# Supplementary material for: O,S-Acetals in a New Modification of oxo-Friedel–Crafts–Bradsher Cyclization—Synthesis of Fluorescent (Hetero)acenes and Mechanistic Considerations
Source: MDPI journal article supplement (doi:10.3390/molecules28062474), 2023-03-08
Supplement: s1 [file s1]

## Supplementary Materials (SM)

### ***O,S*-Acetals in a new modification of the *oxo*-Friedel-Crafts-Bradsher cyclization – synthesis of fluorescent (hetero)acenes and mechanistic considerations.**

Krzysztof Owsianik <sup>1,\*</sup>, Ewa Różycka-Sokołowska <sup>2\*</sup> and Piotr Bałczewski <sup>1,2,\*</sup>

<sup>1</sup>Division of Organic Chemistry, Centre of Molecular and Macromolecular Studies, Polish Academy of Sciences, Sienkiewicza 112, Łódź, 90-363, Poland

<sup>2</sup>Institute of Chemistry, Faculty of Science and Technology, Jan Długosz University in Częstochowa, Armii Krajowej 13/15, Częstochowa, 42-201, Poland.

\*Correspondence: krzysztof.owsianik@cbmm.lodz.pl (K.O.); e.sokolowska@ujd.edu.pl (E.R.-S.); piotr.balczewski@cbmm.lodz.pl (P.B.)

### Table of contents

|                                                                     |         |
|---------------------------------------------------------------------|---------|
| <sup>1</sup> H and <sup>13</sup> C NMR spectra                      | S2-S41  |
| Crystal structure determination                                     | S42-S42 |
| Calculations                                                        | S43-43  |
| Cartesian coordinates and total energies for investigated compounds | S44-    |
| S50                                                                 |         |
| References                                                          | S50-S50 |

# <sup>1</sup>H and <sup>13</sup>C NMR spectra

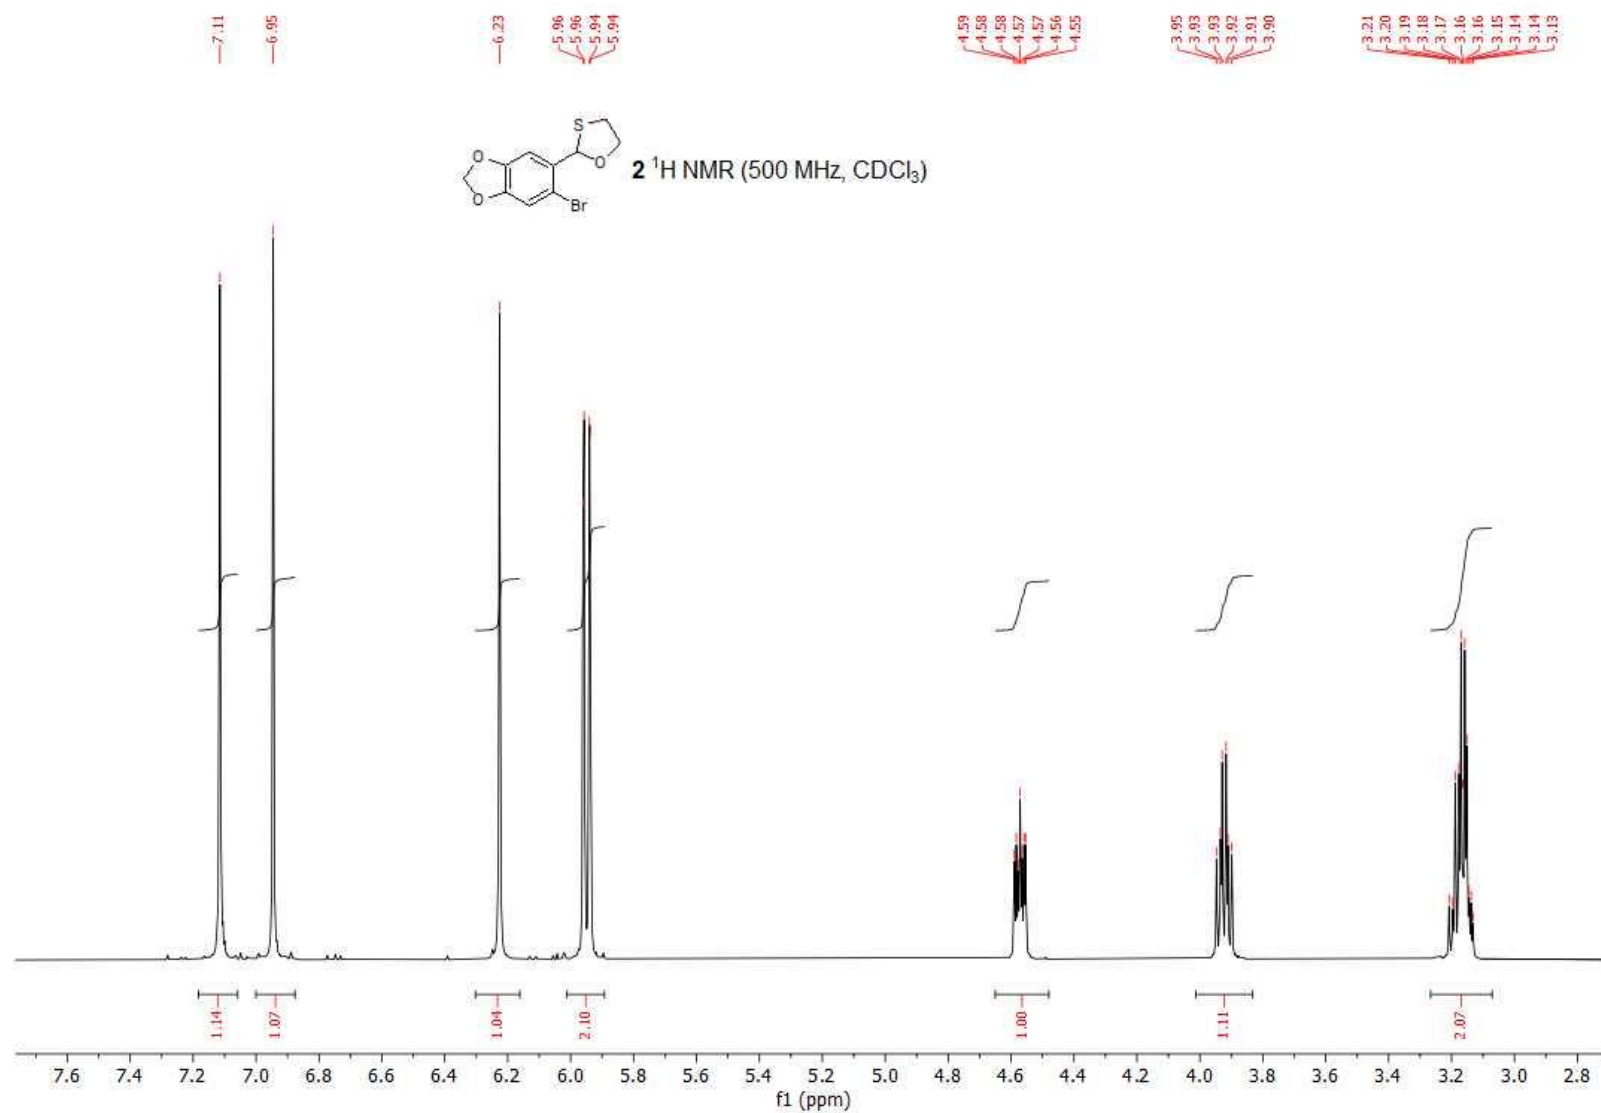



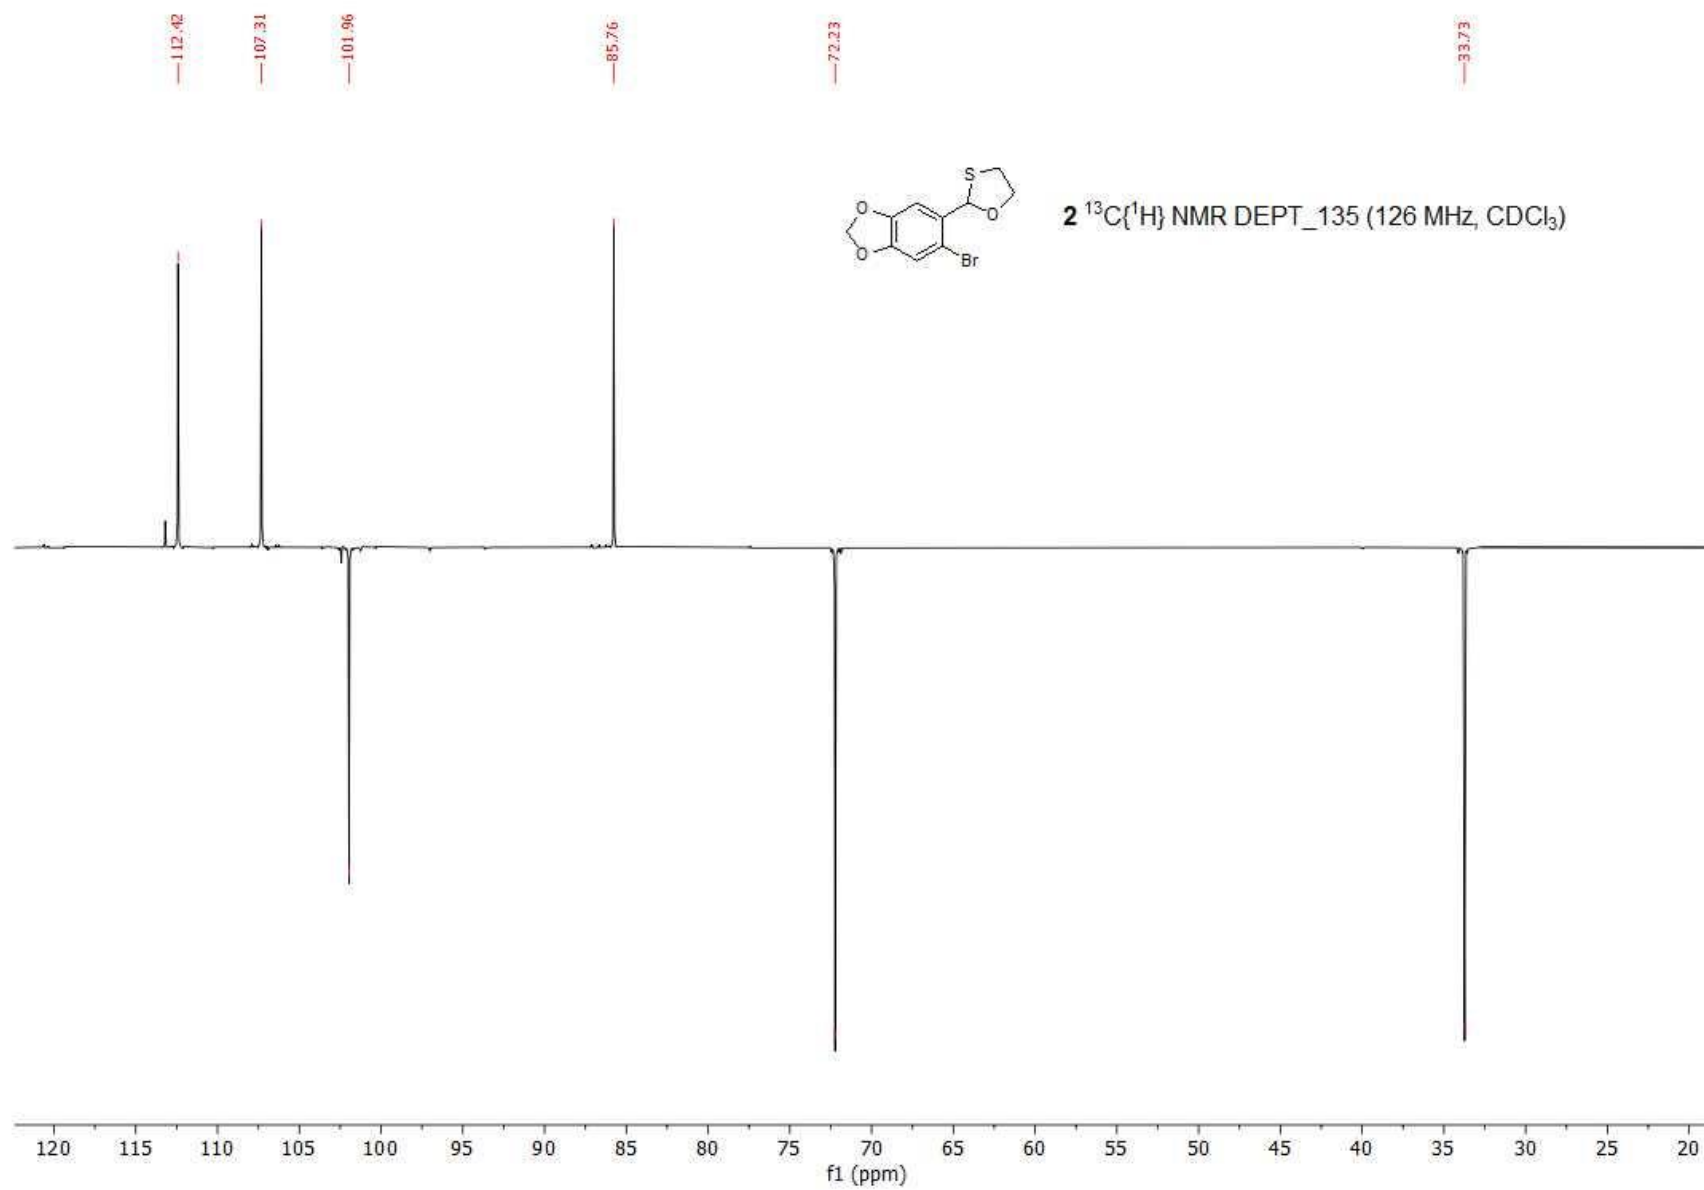

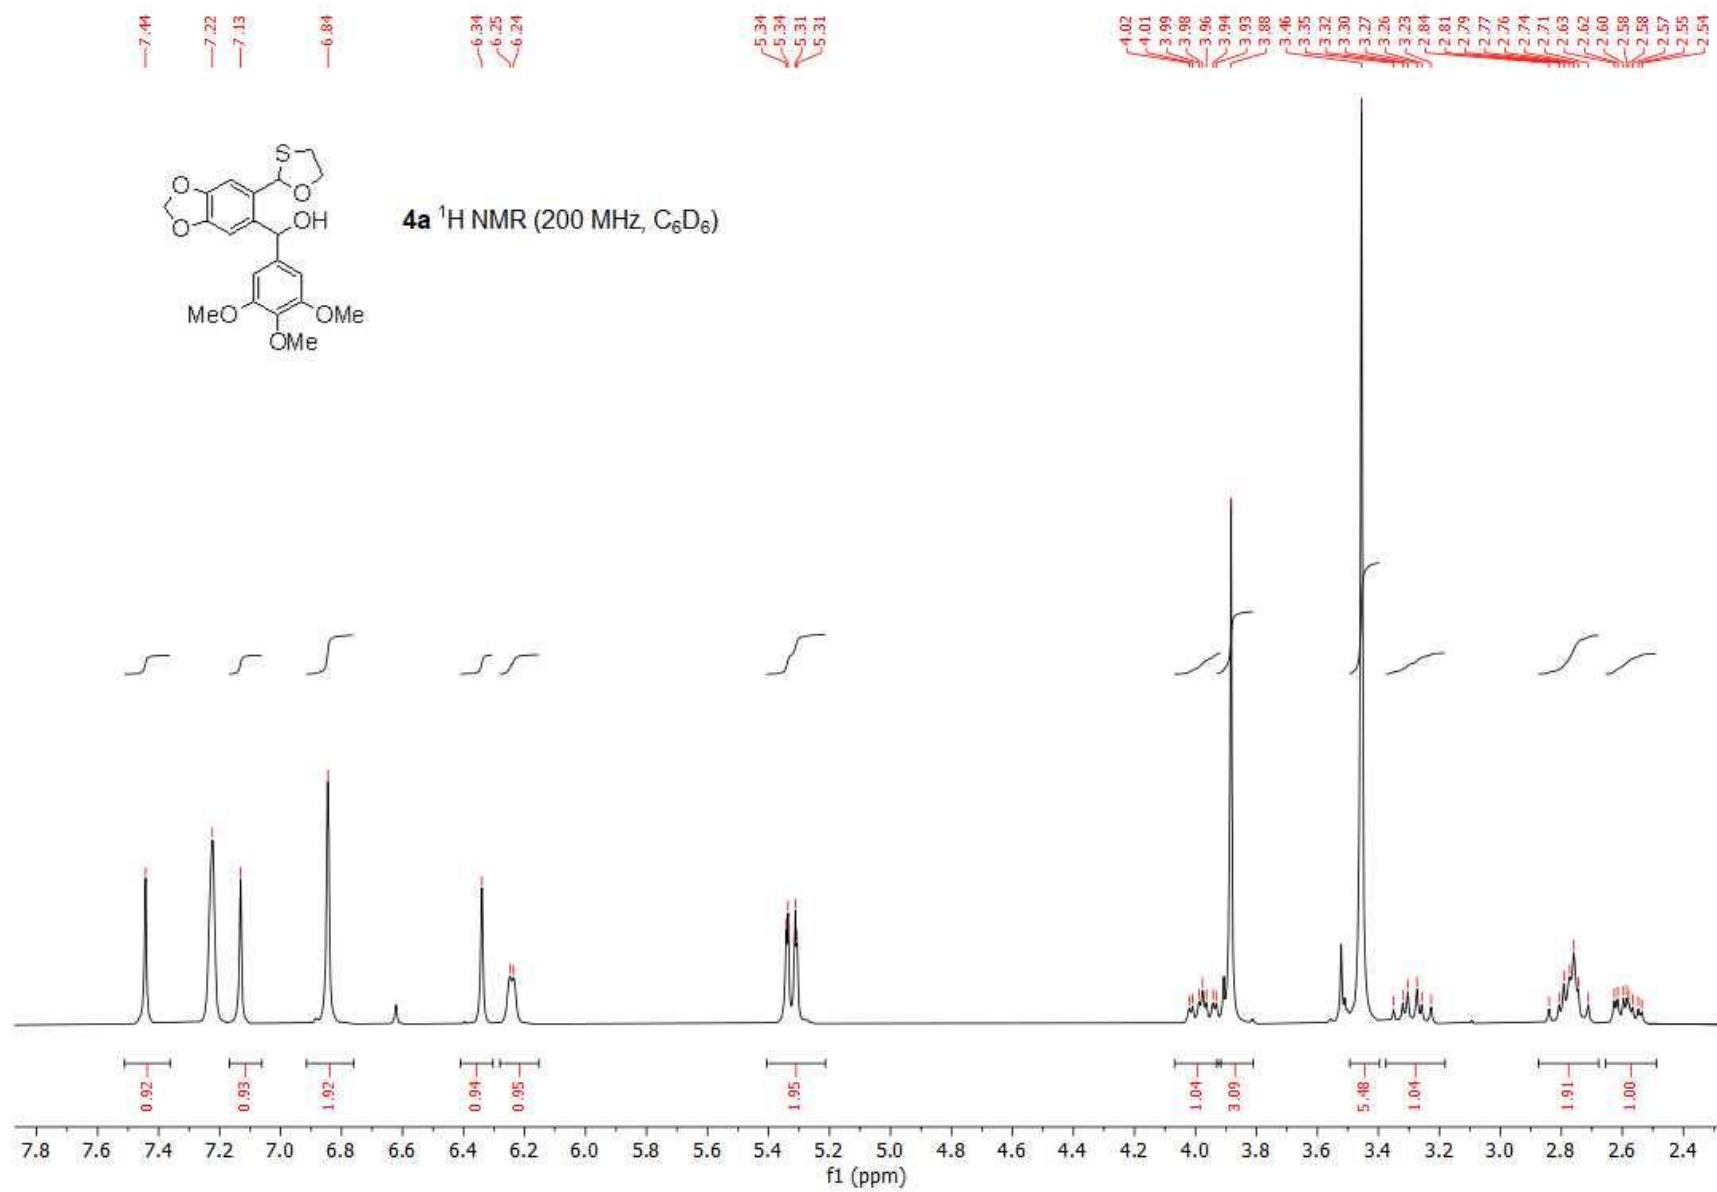



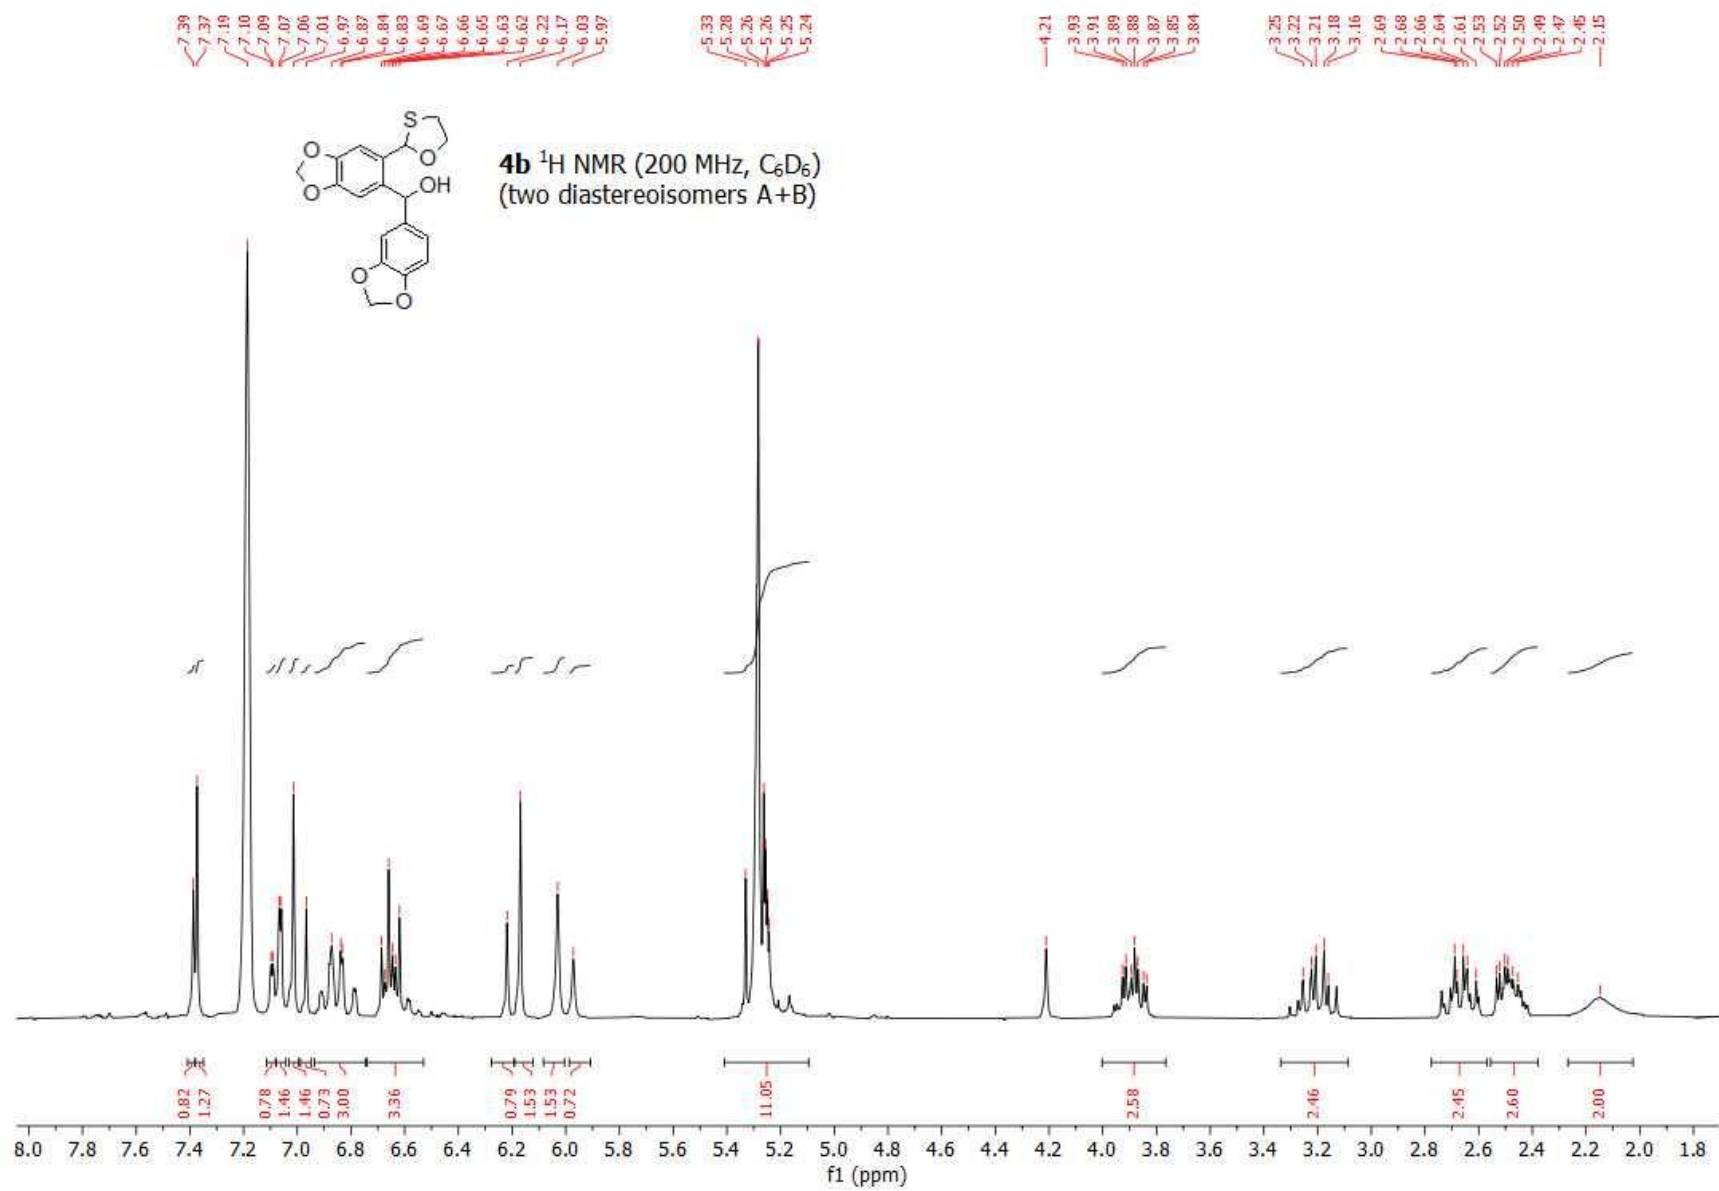

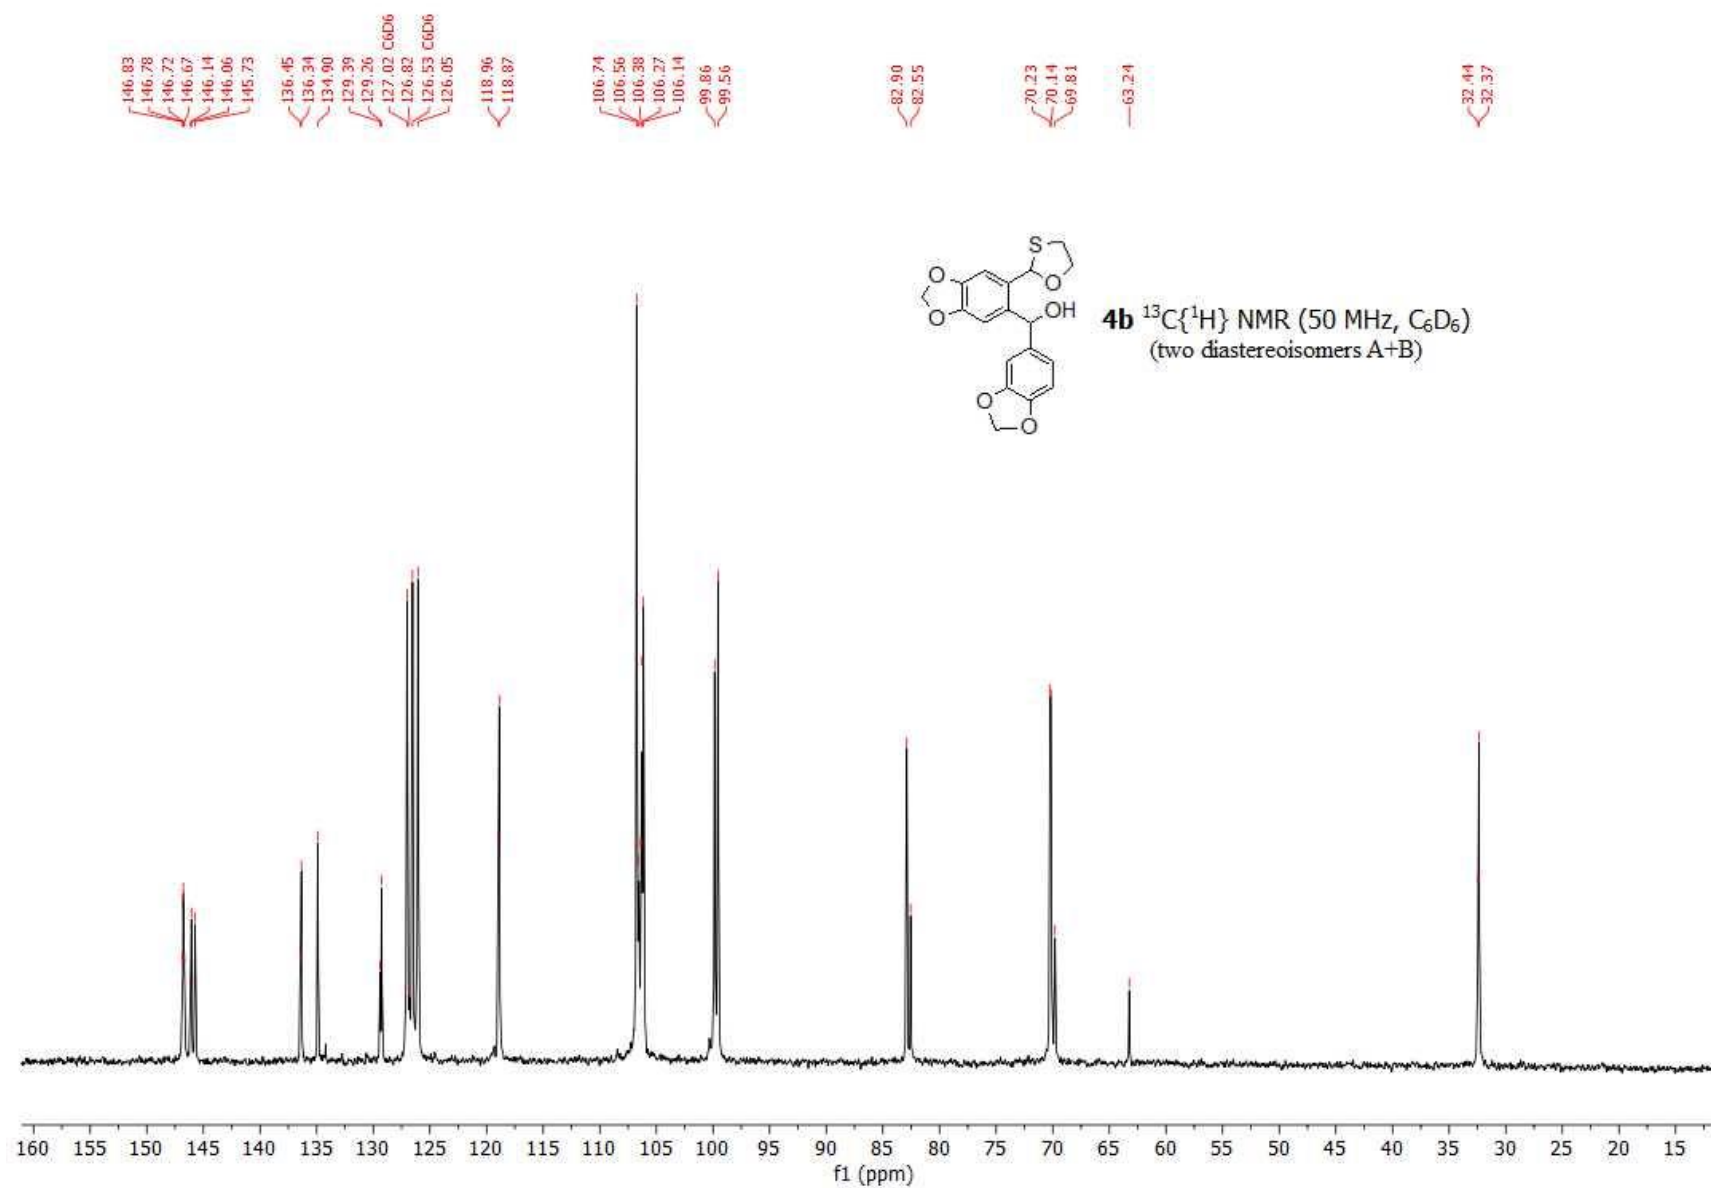



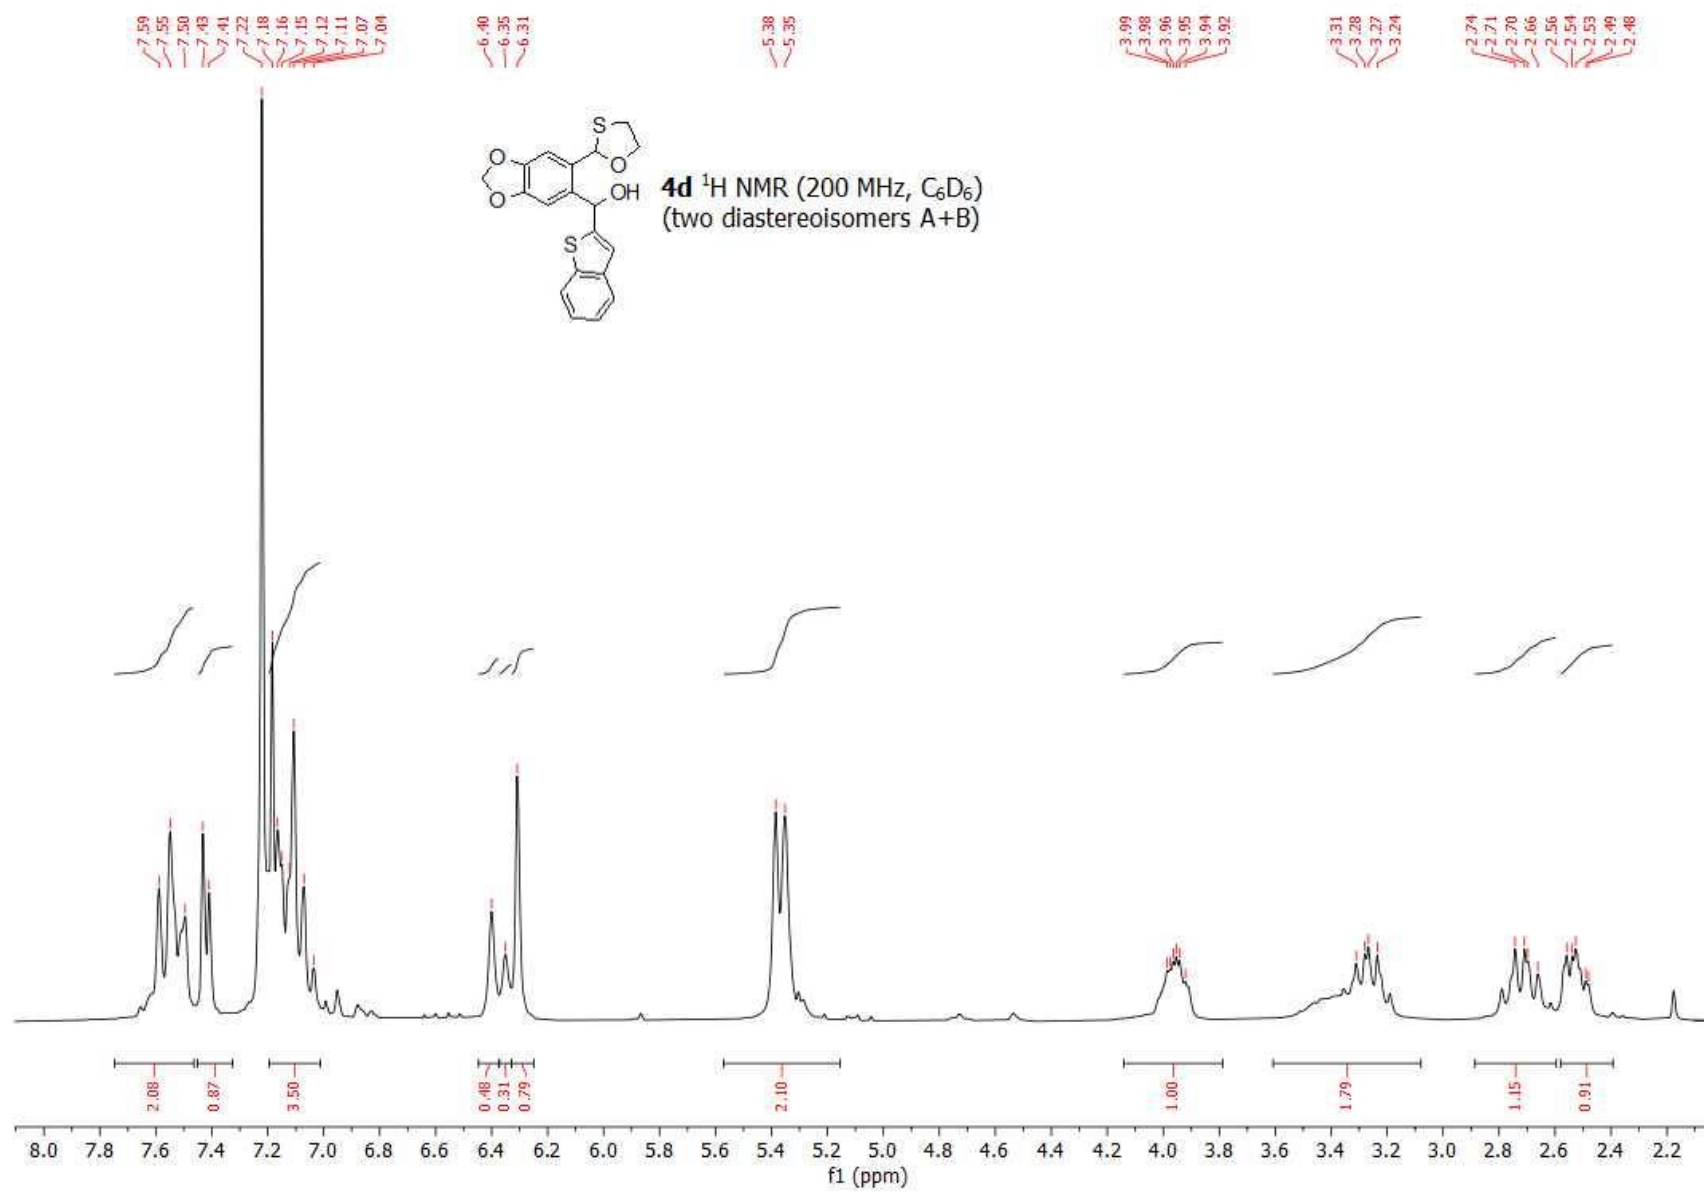

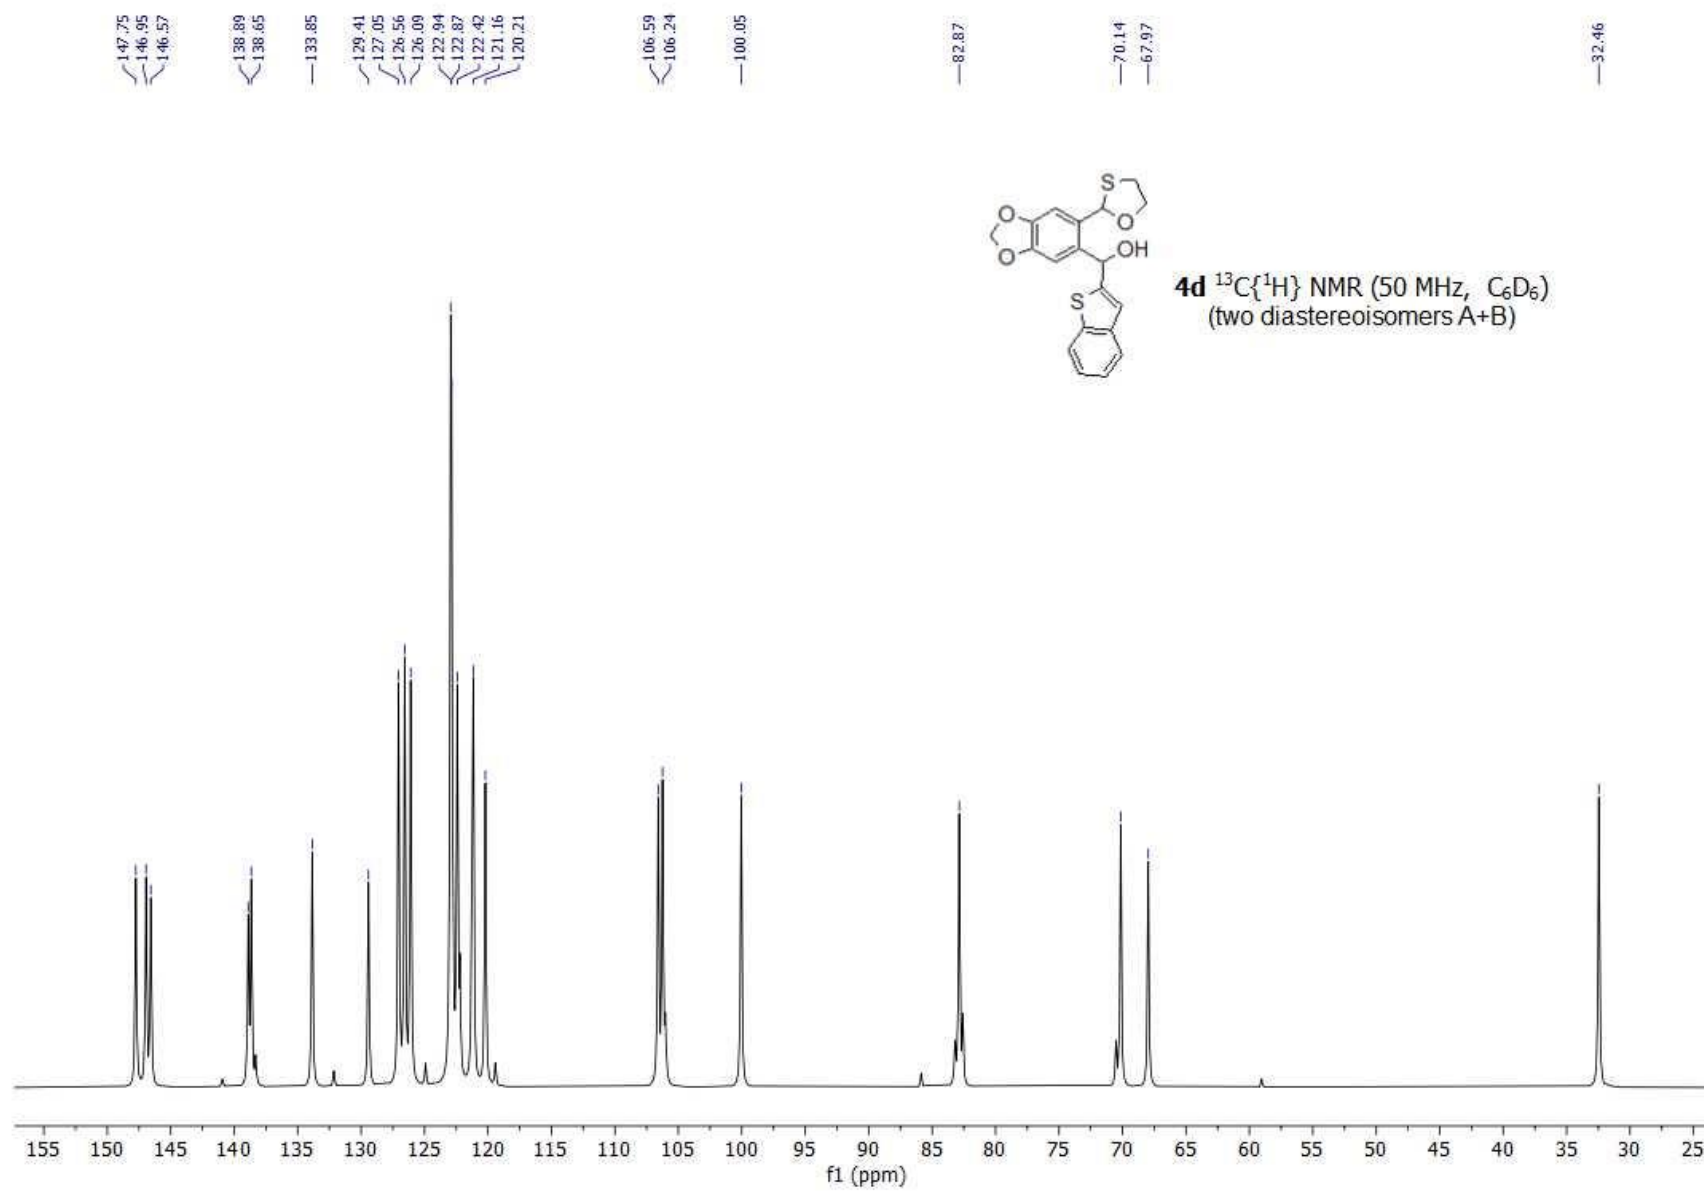

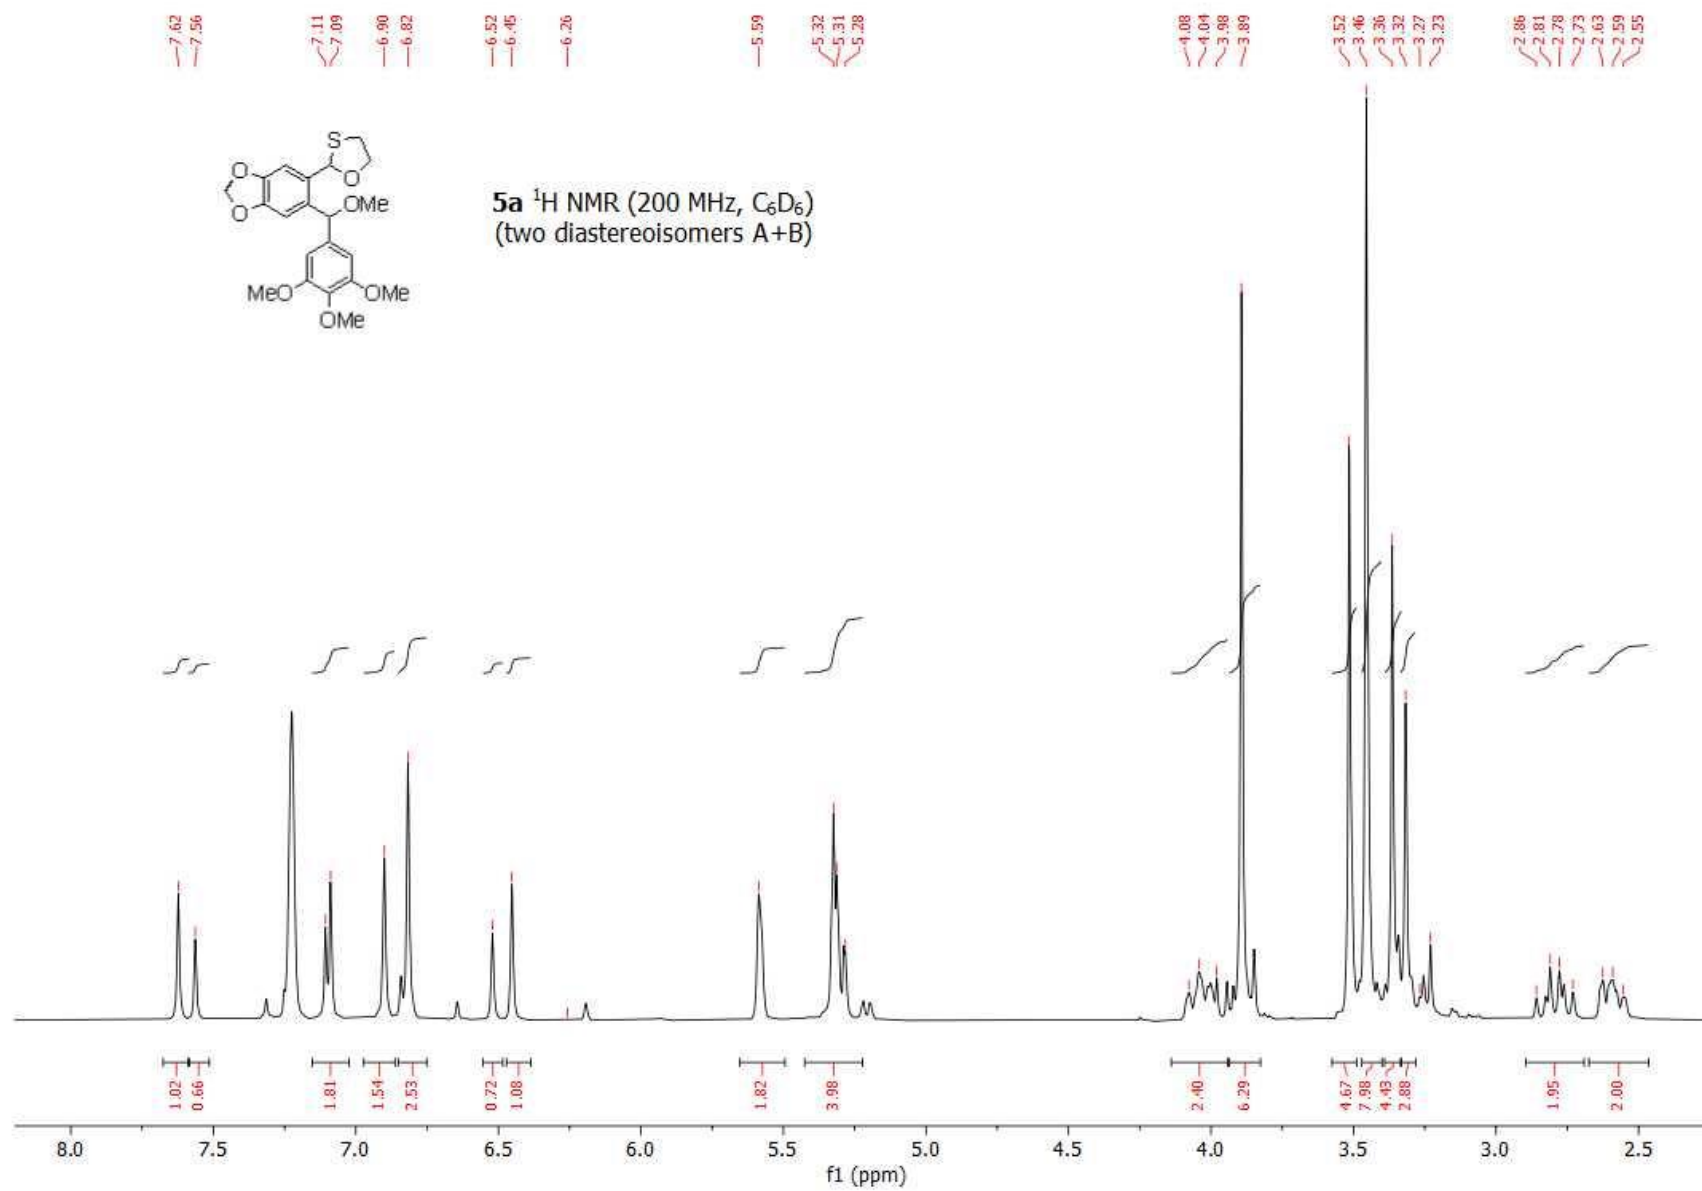

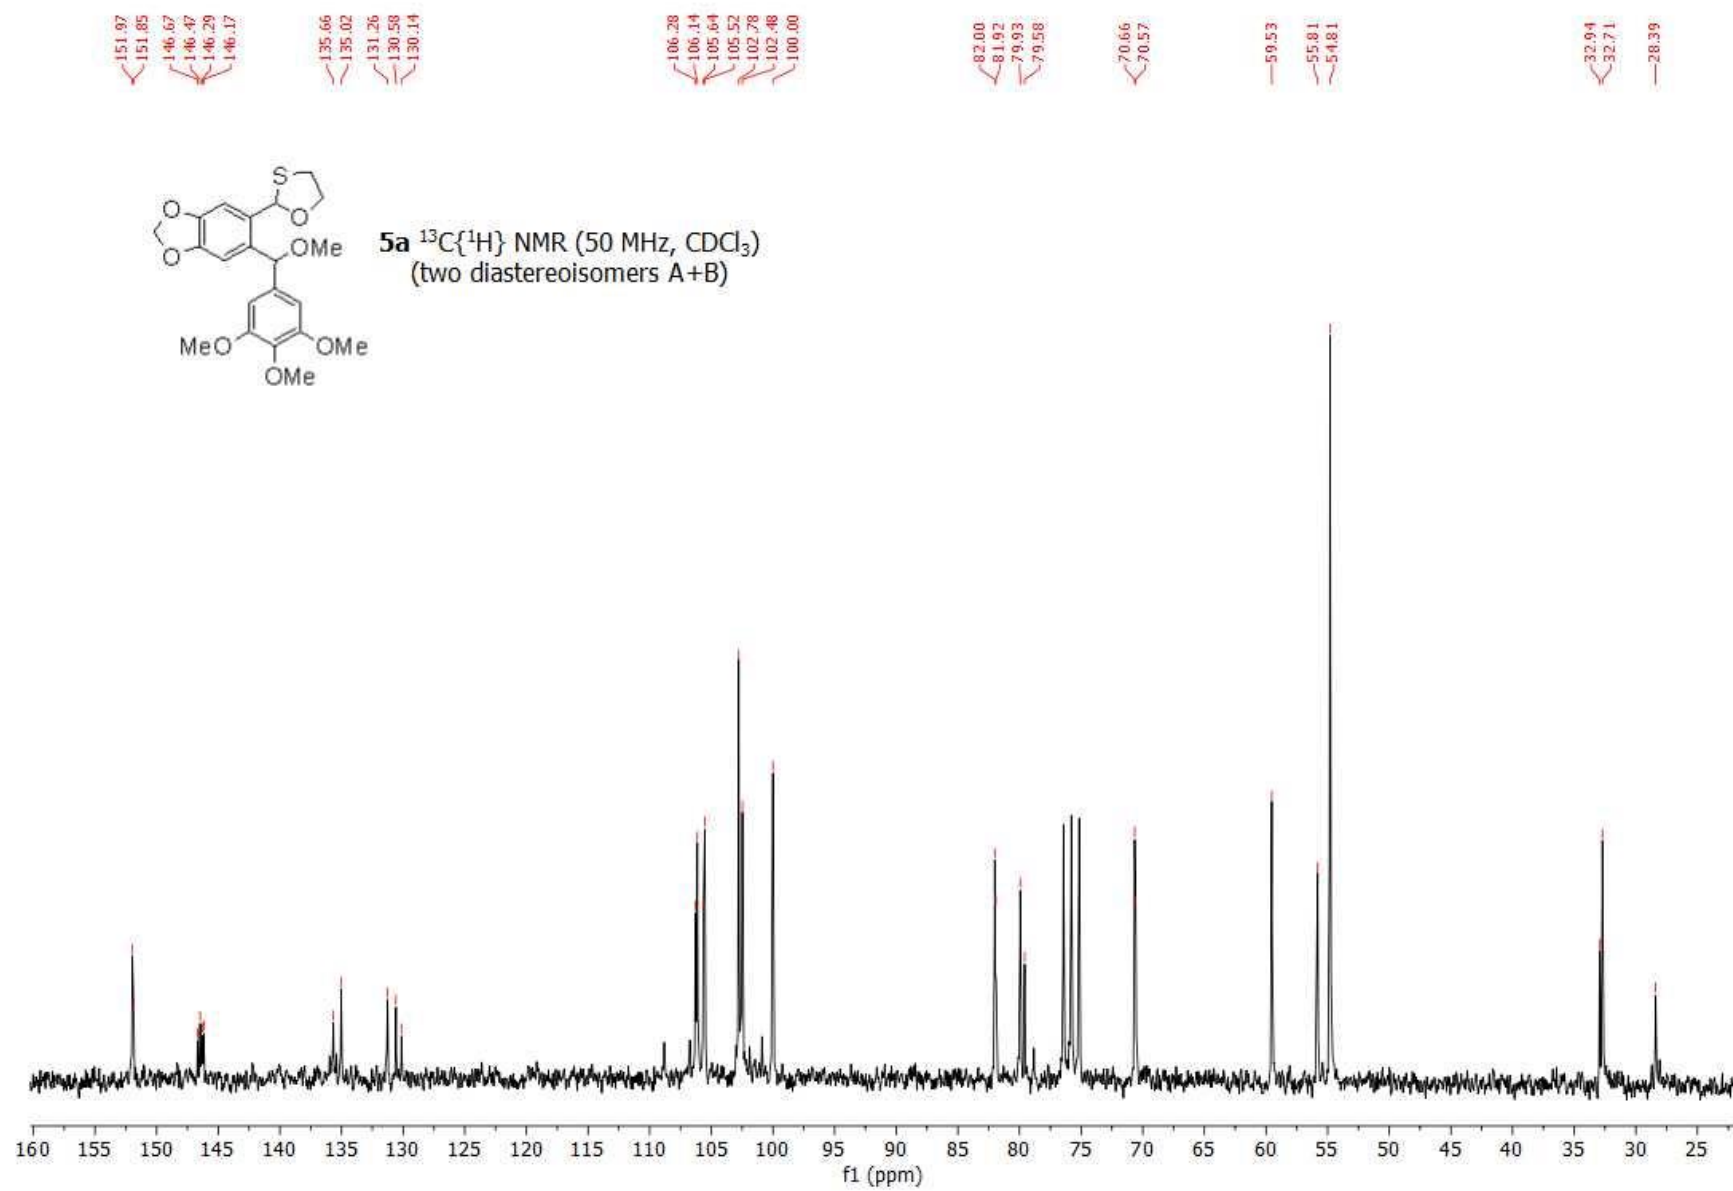

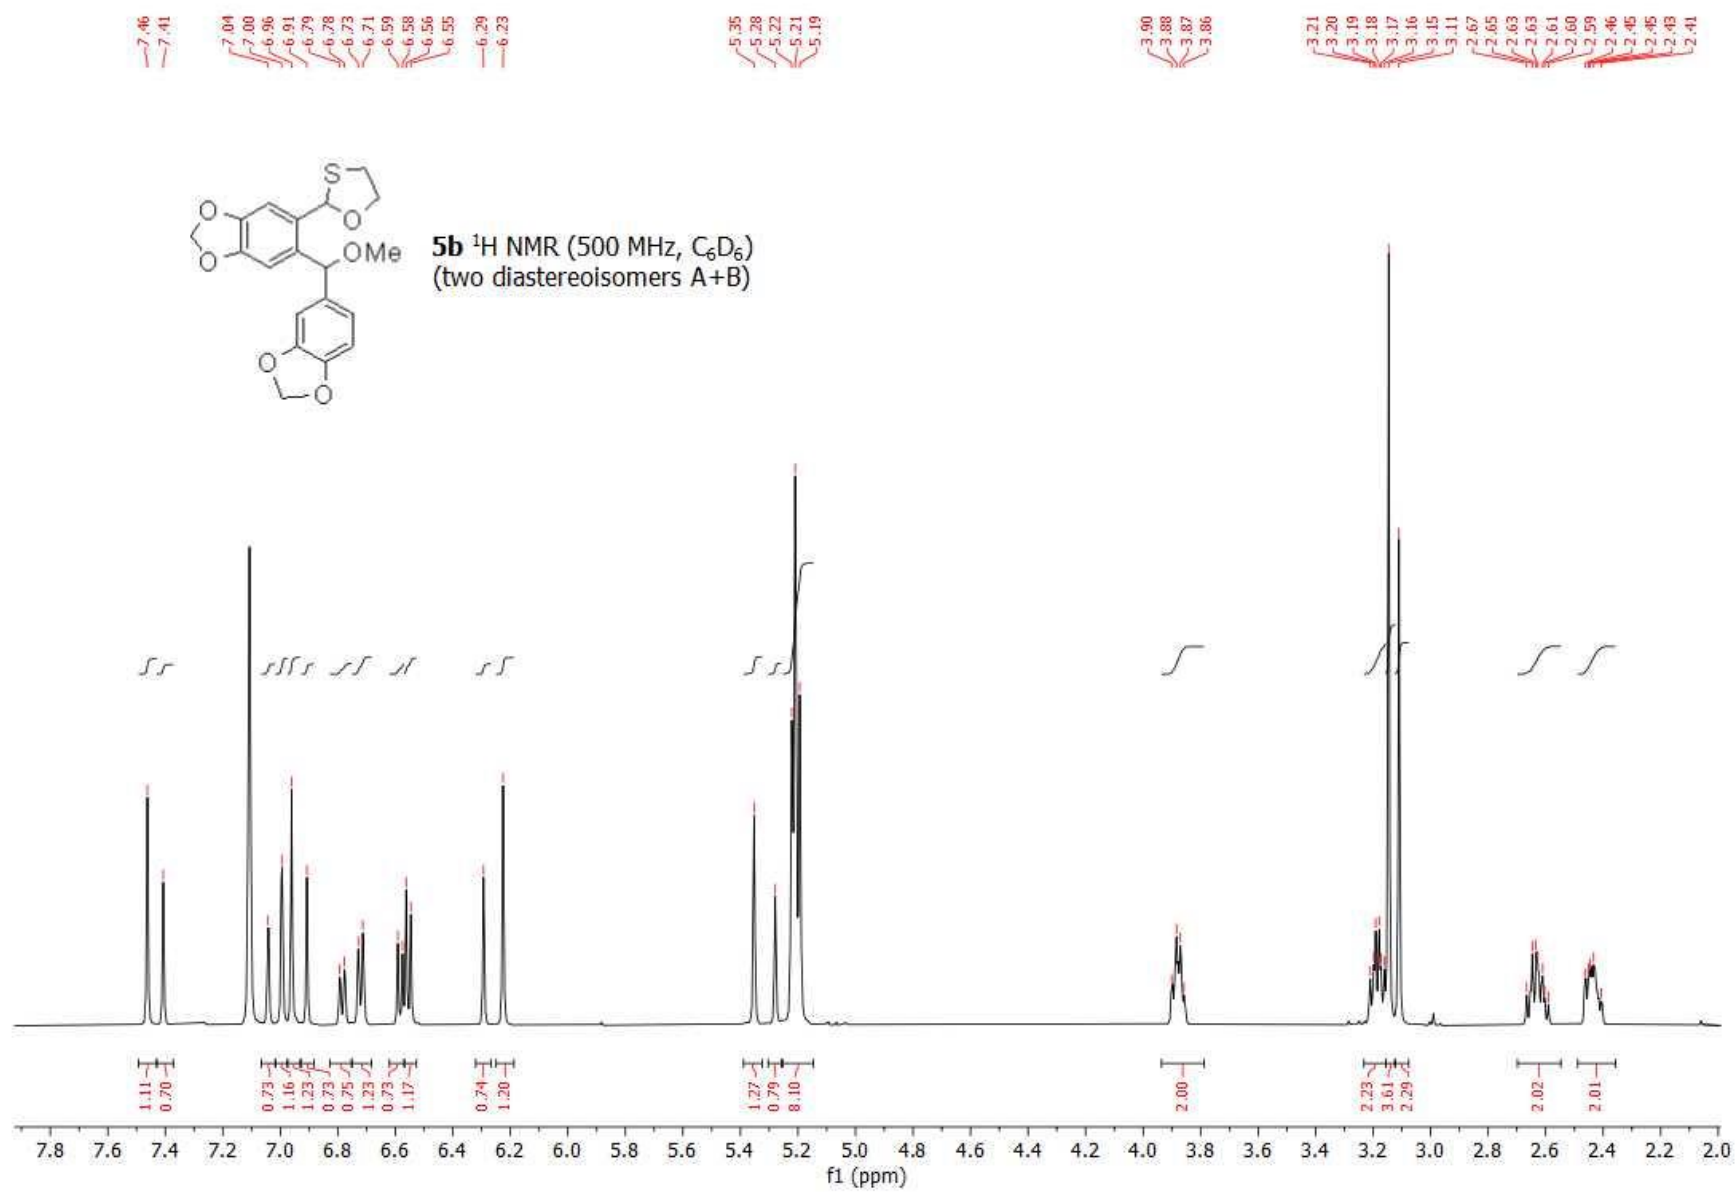

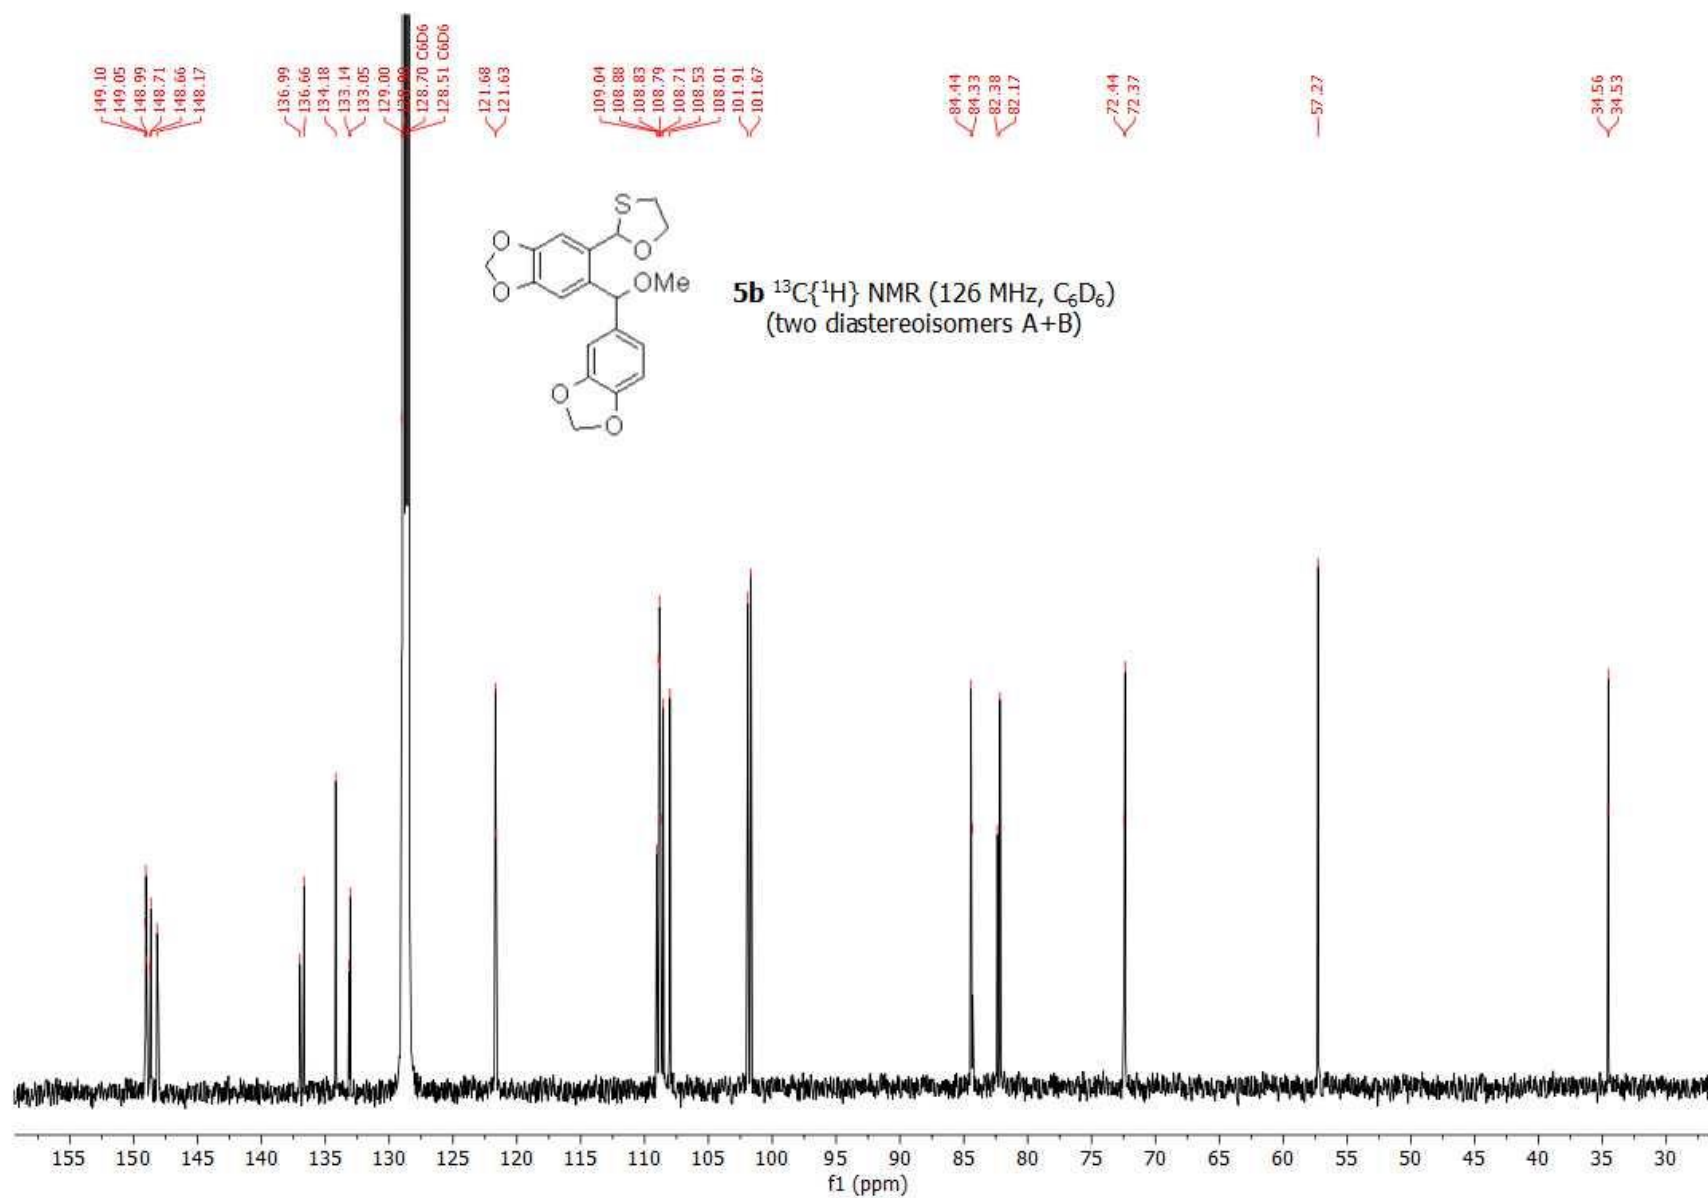



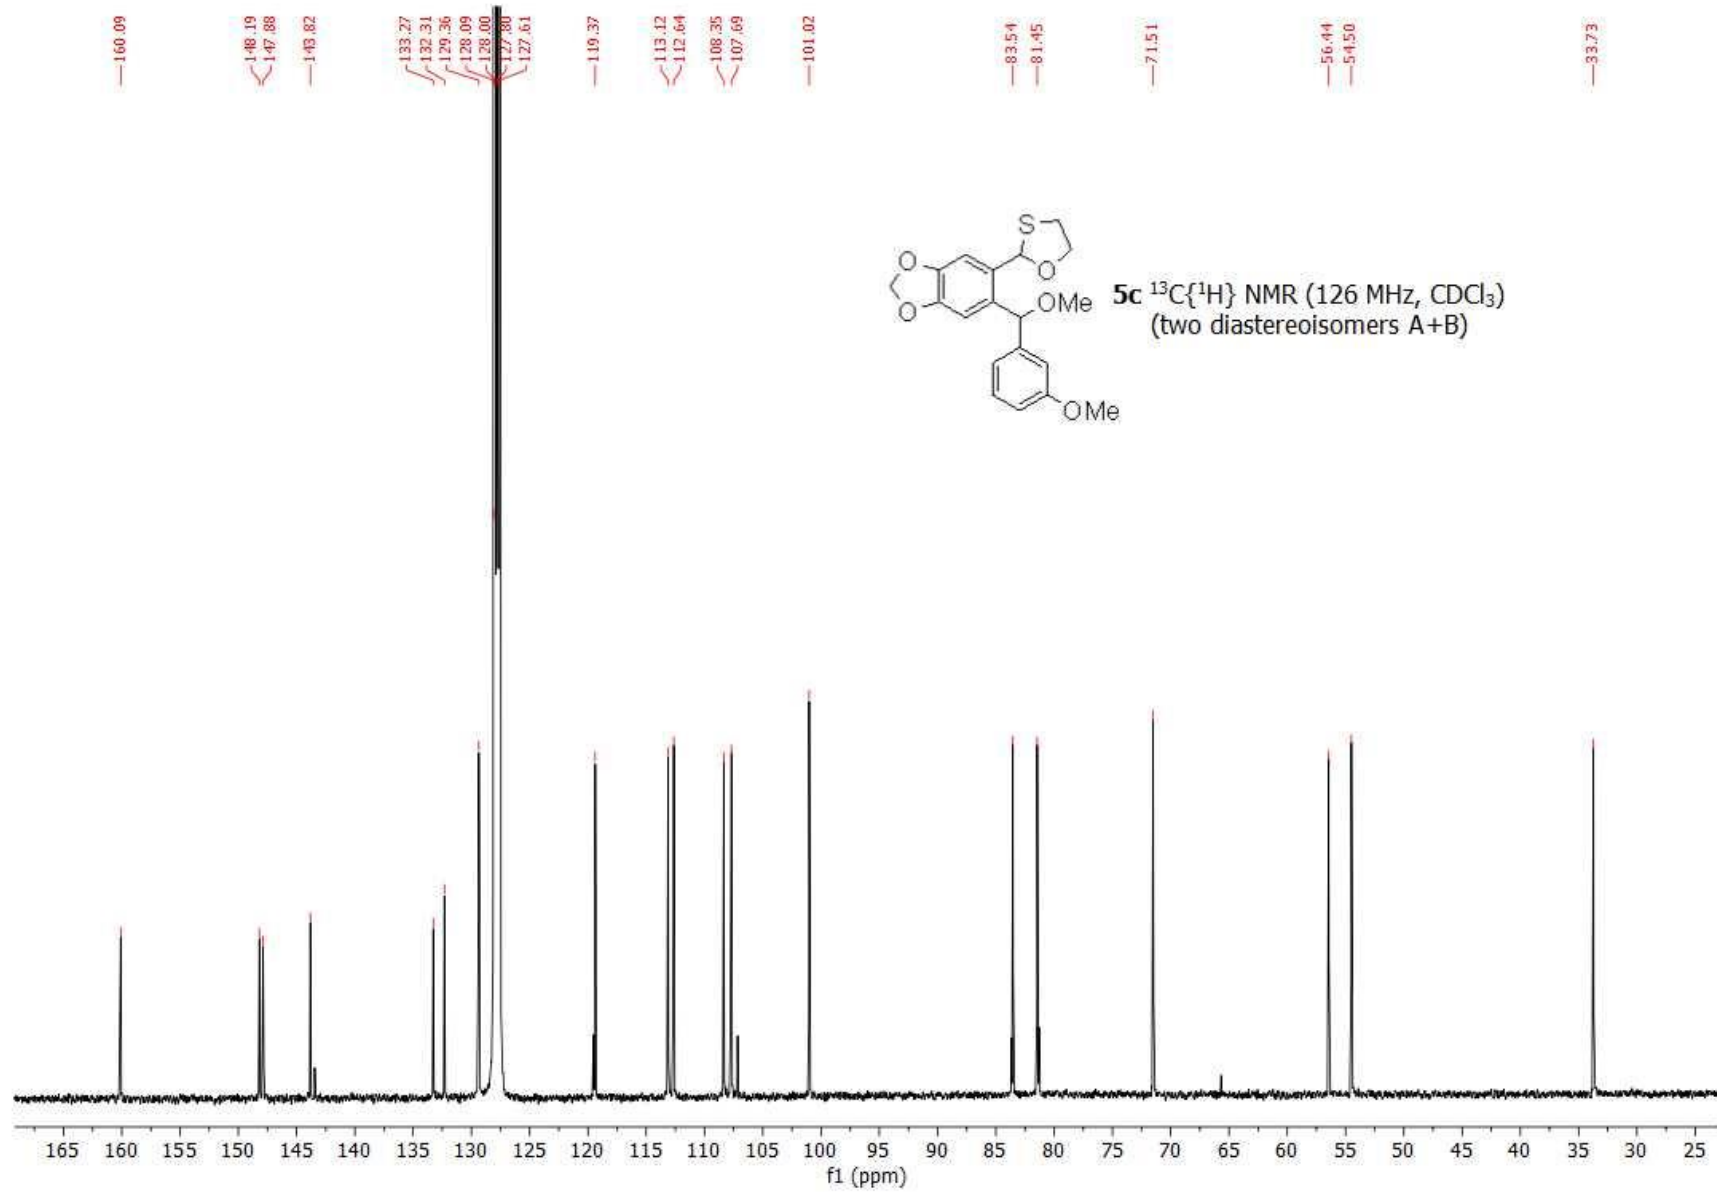



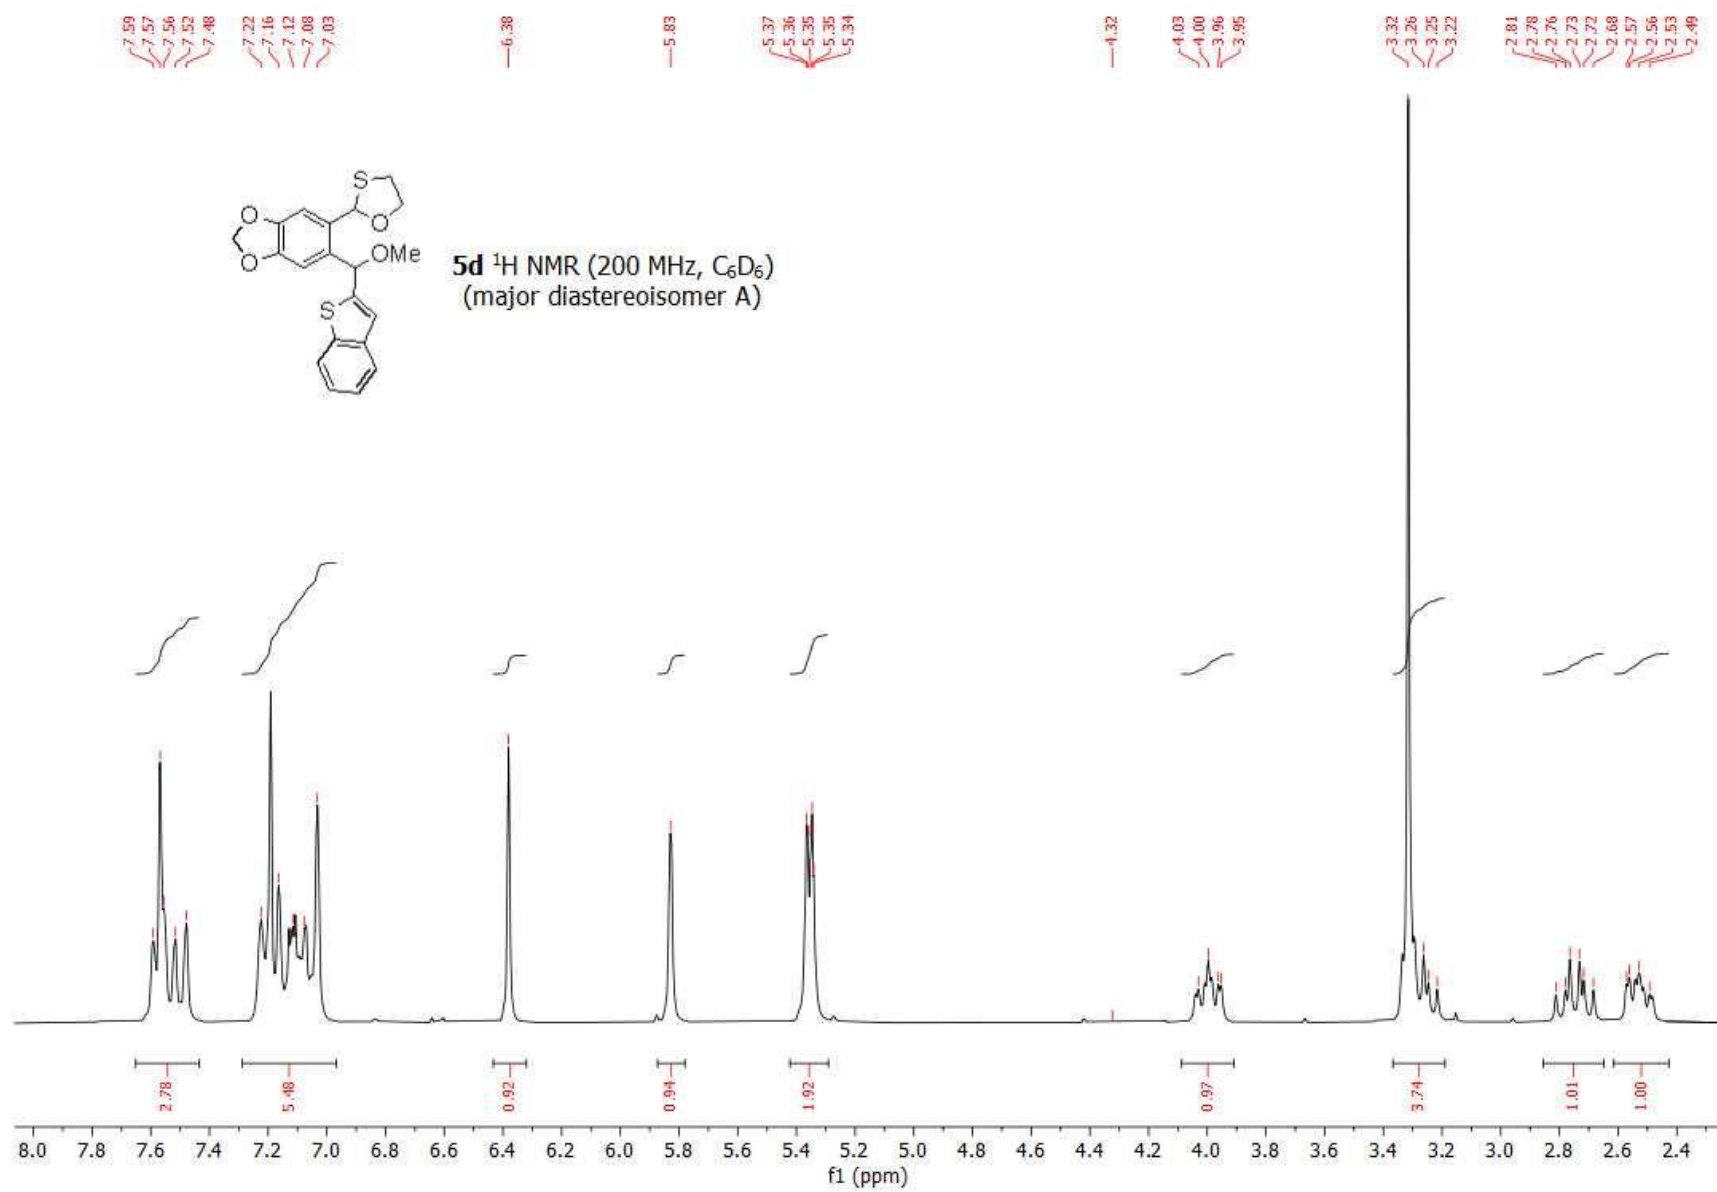

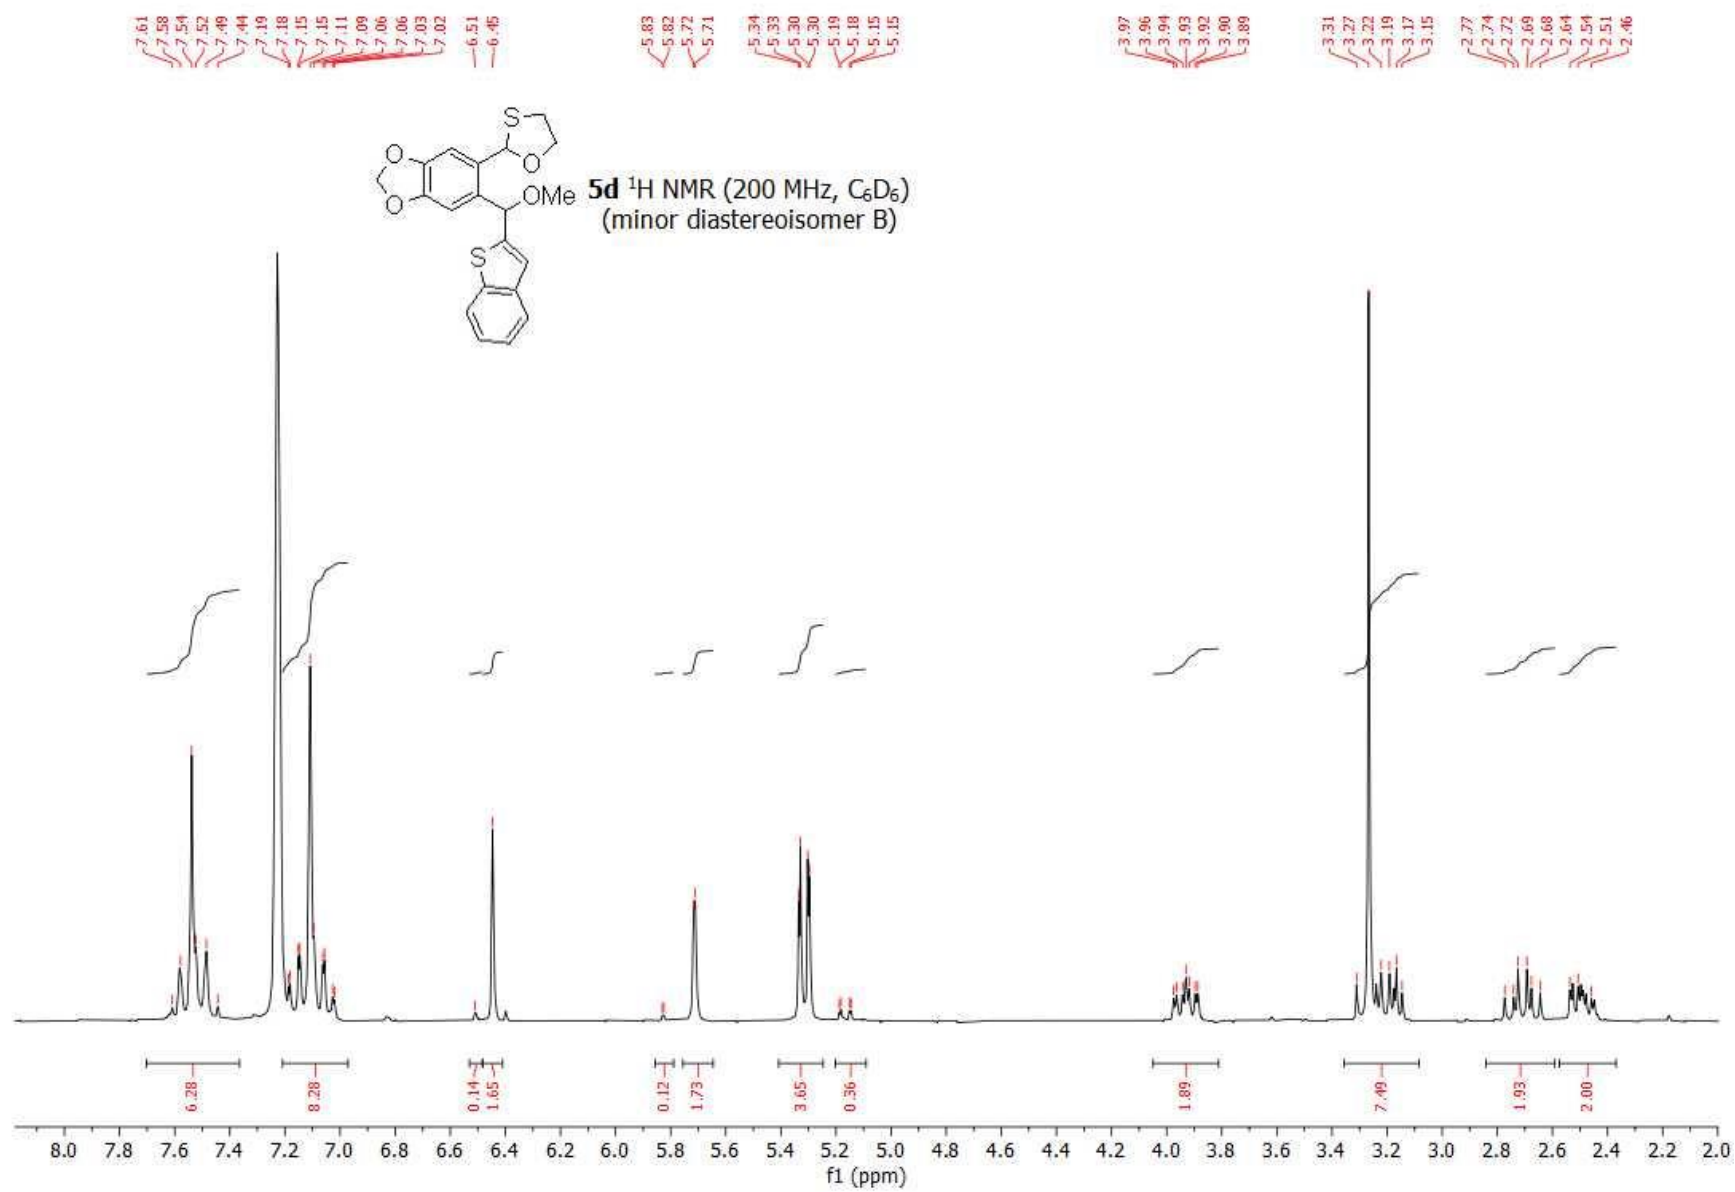

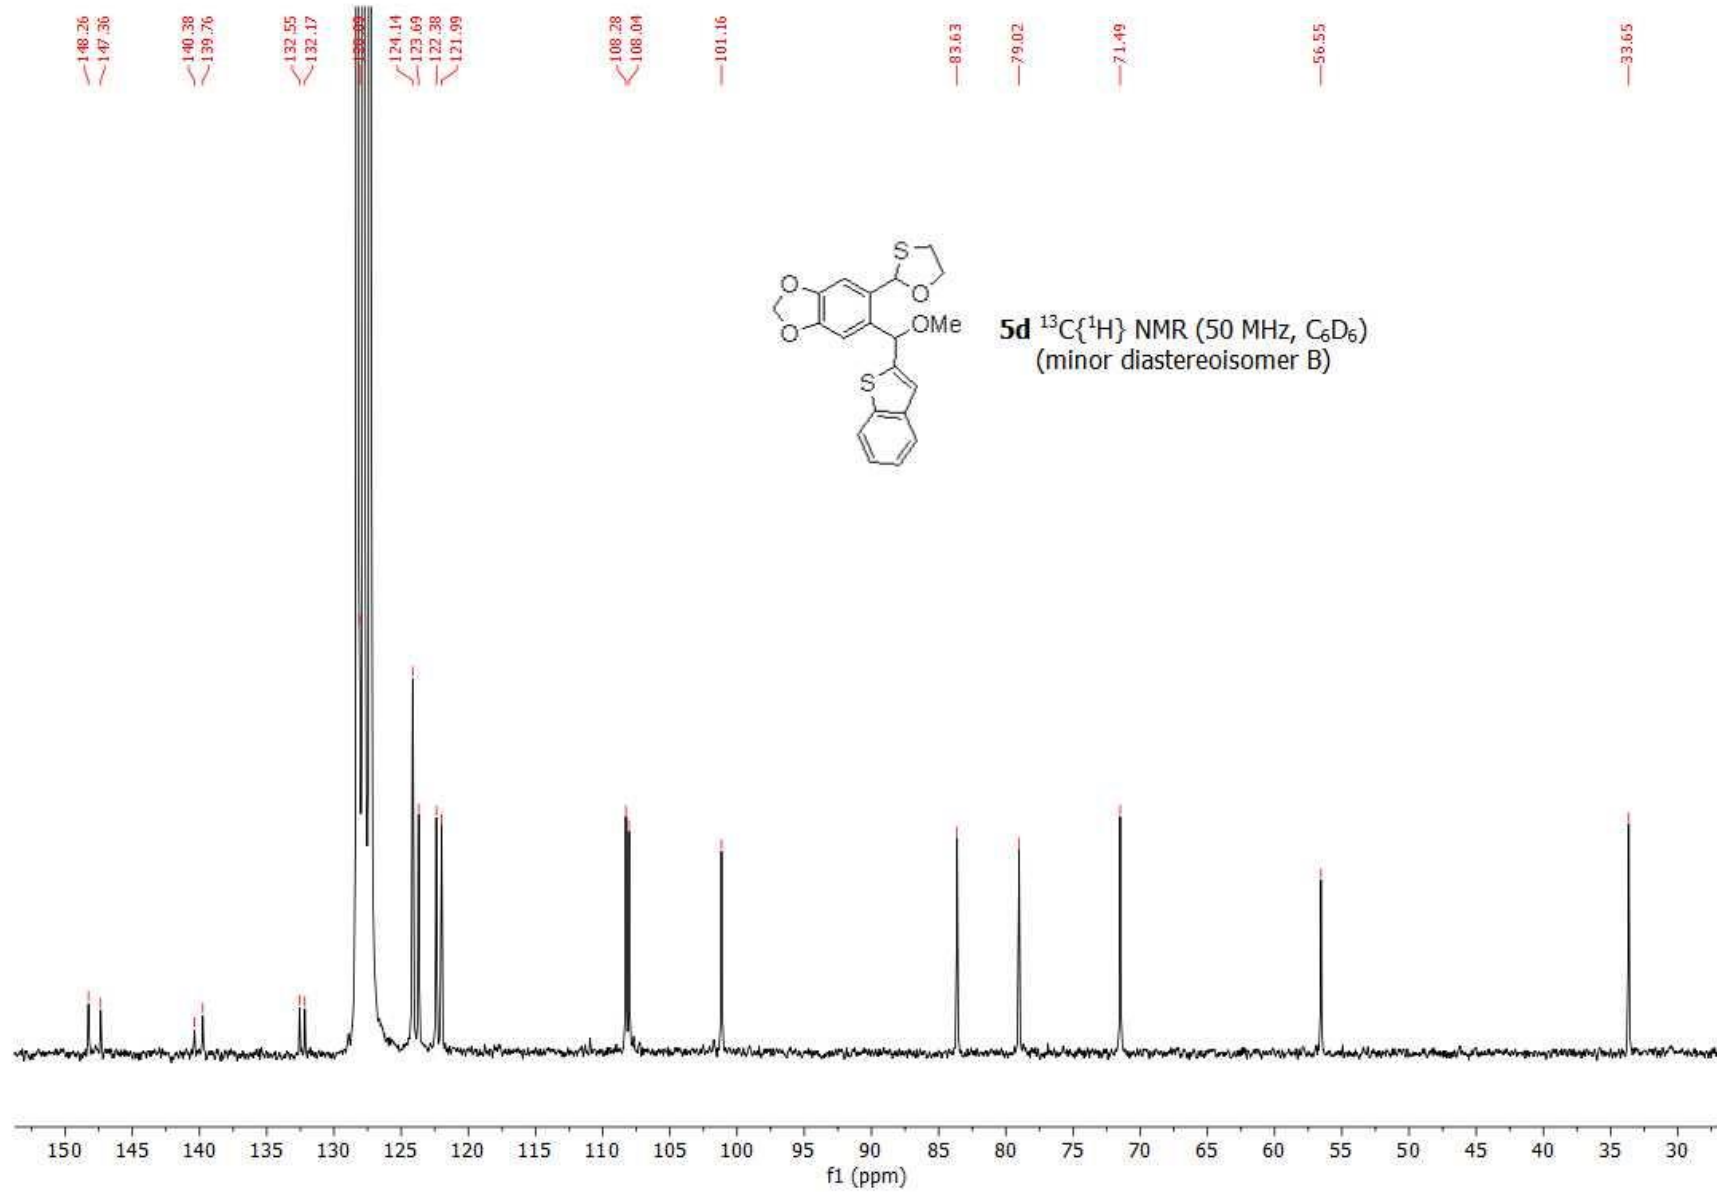



ows12109  
KCE-20/1

8.52

7.74

7.37

7.20

5.35

4.01

3.93

3.81

3.56

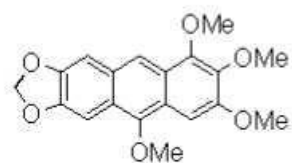

**7a**  $^1\text{H}$  NMR (200 MHz,  $\text{C}_6\text{D}_6$ )

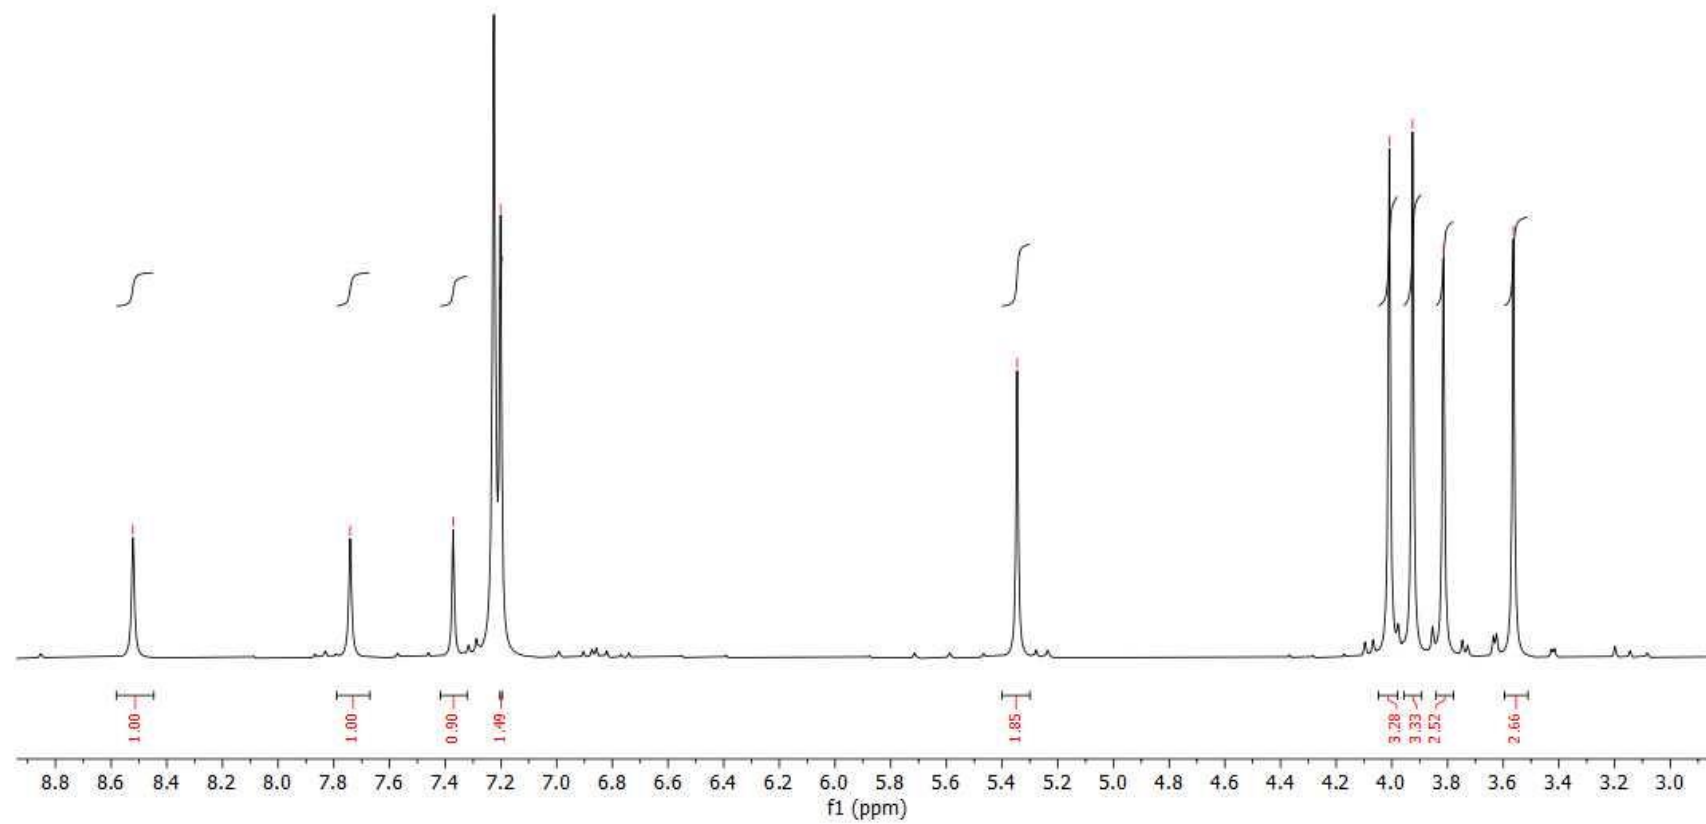

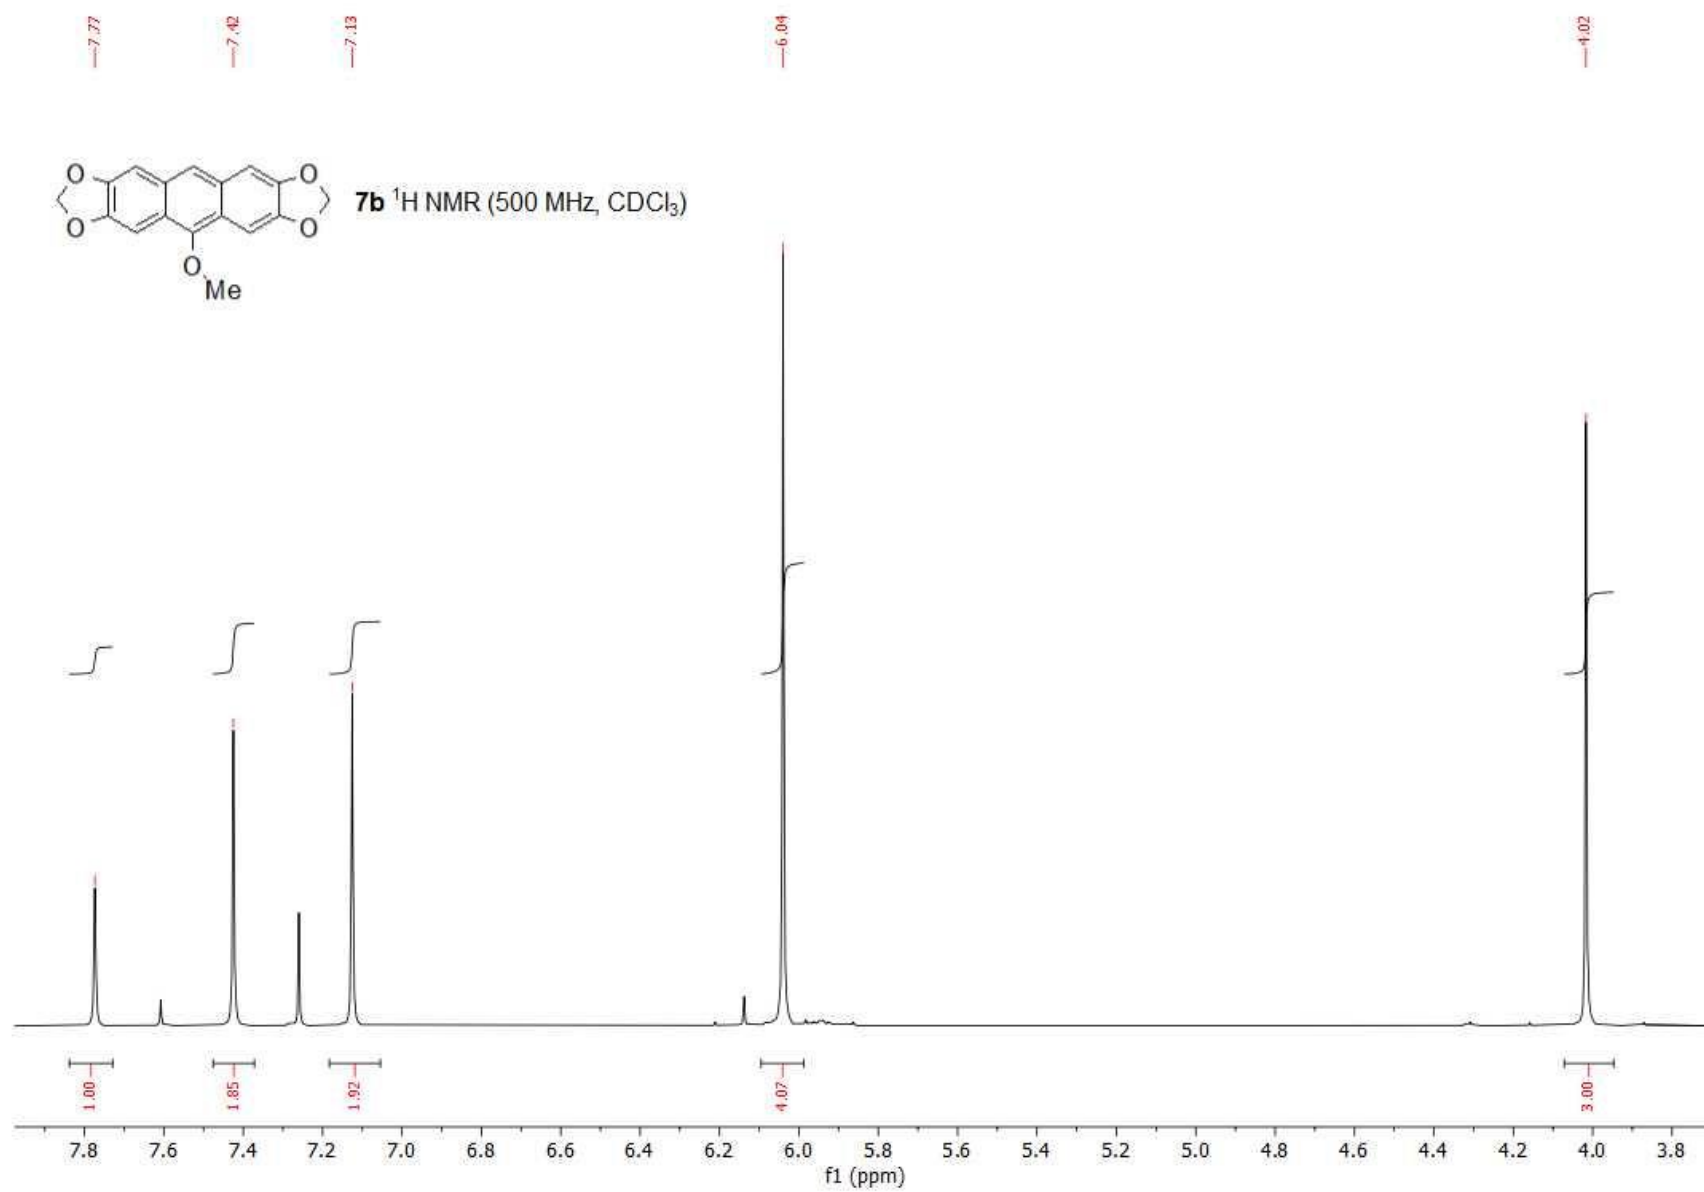

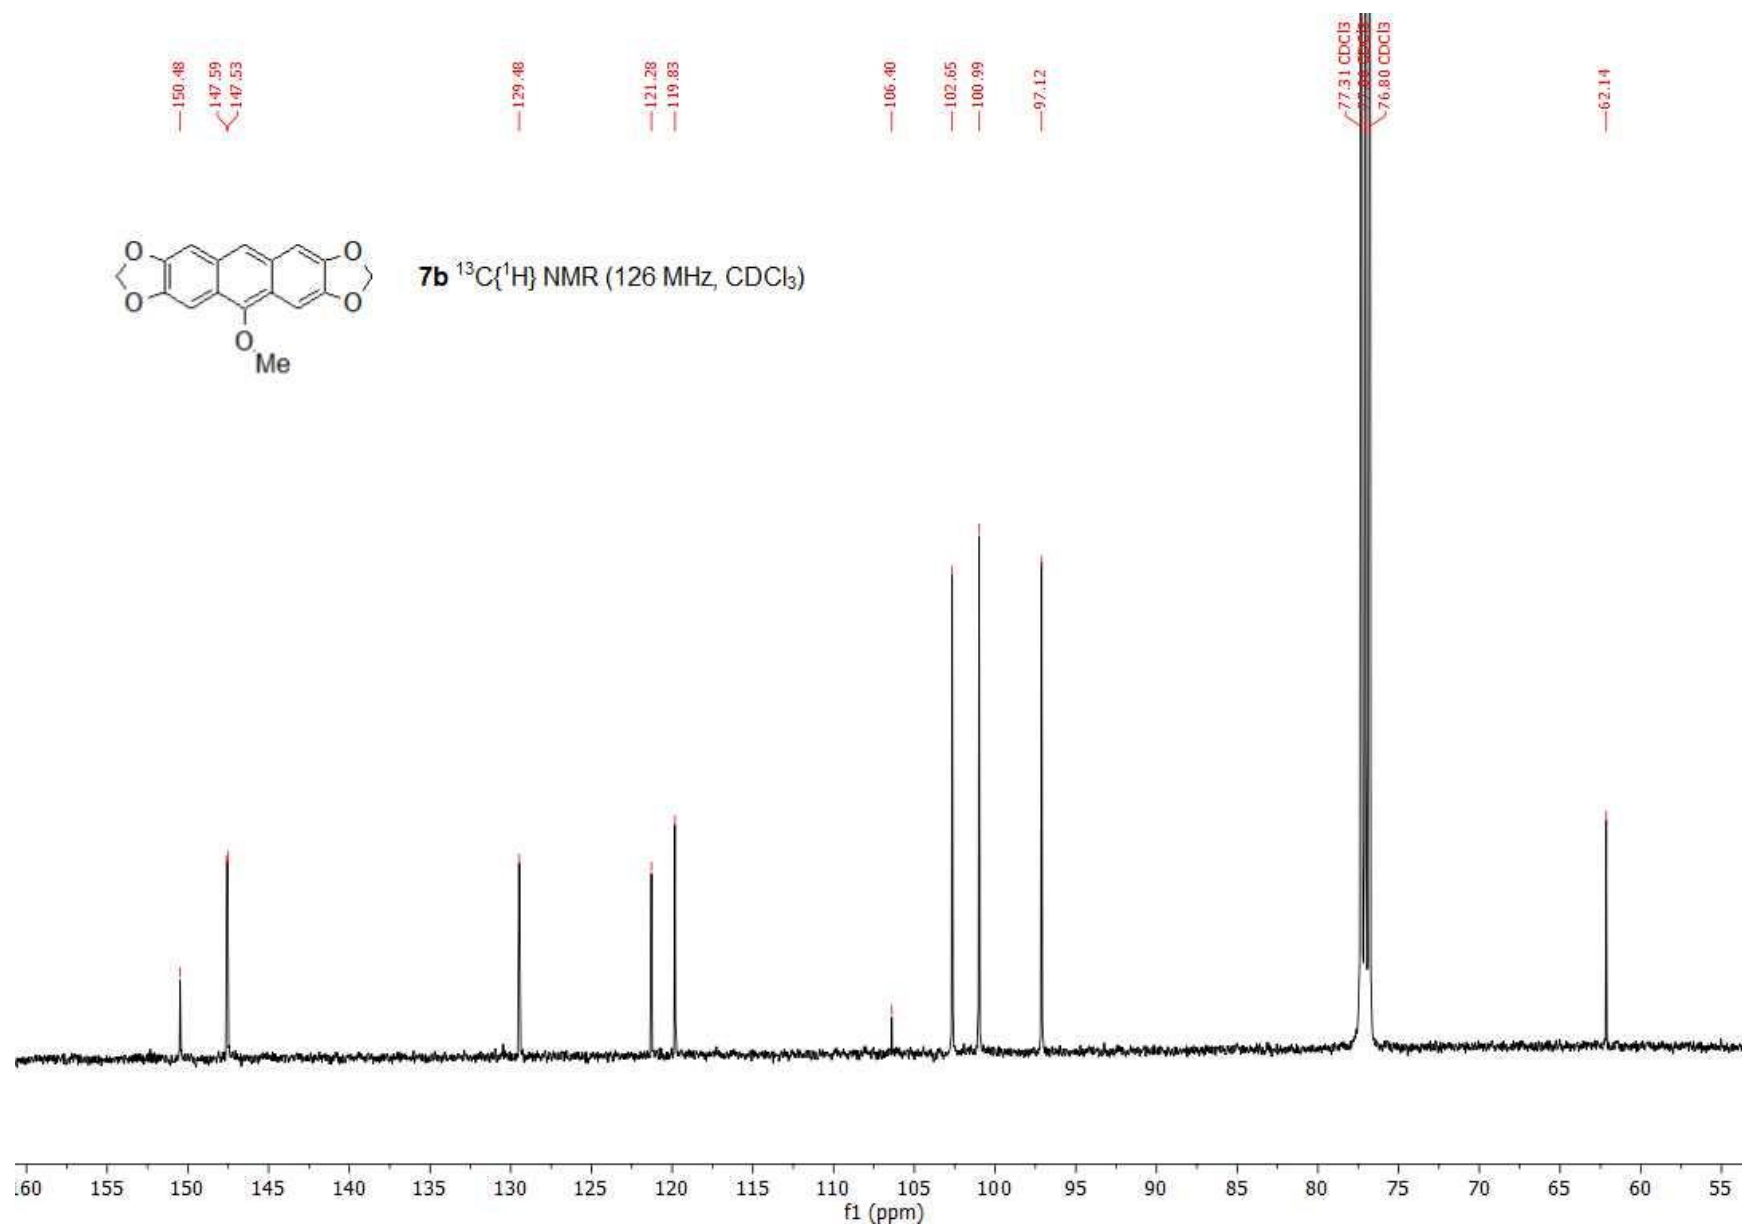

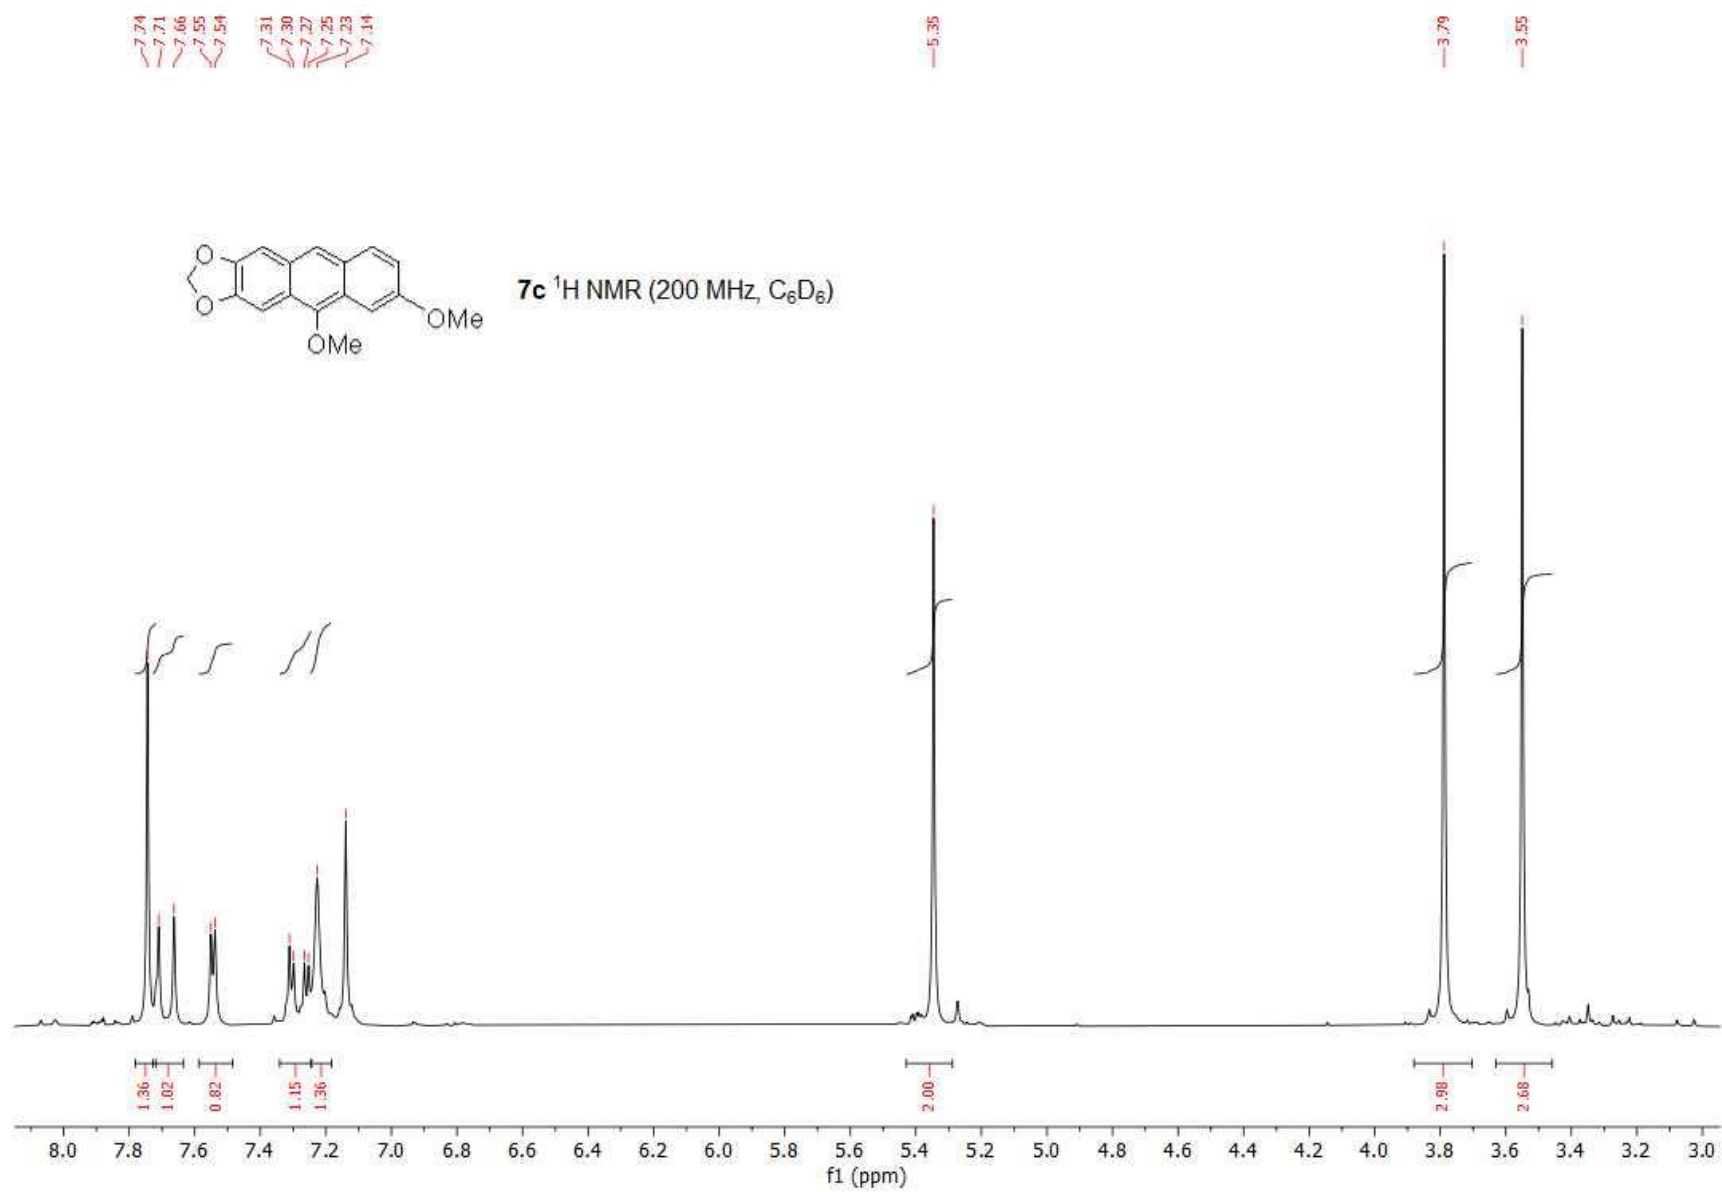



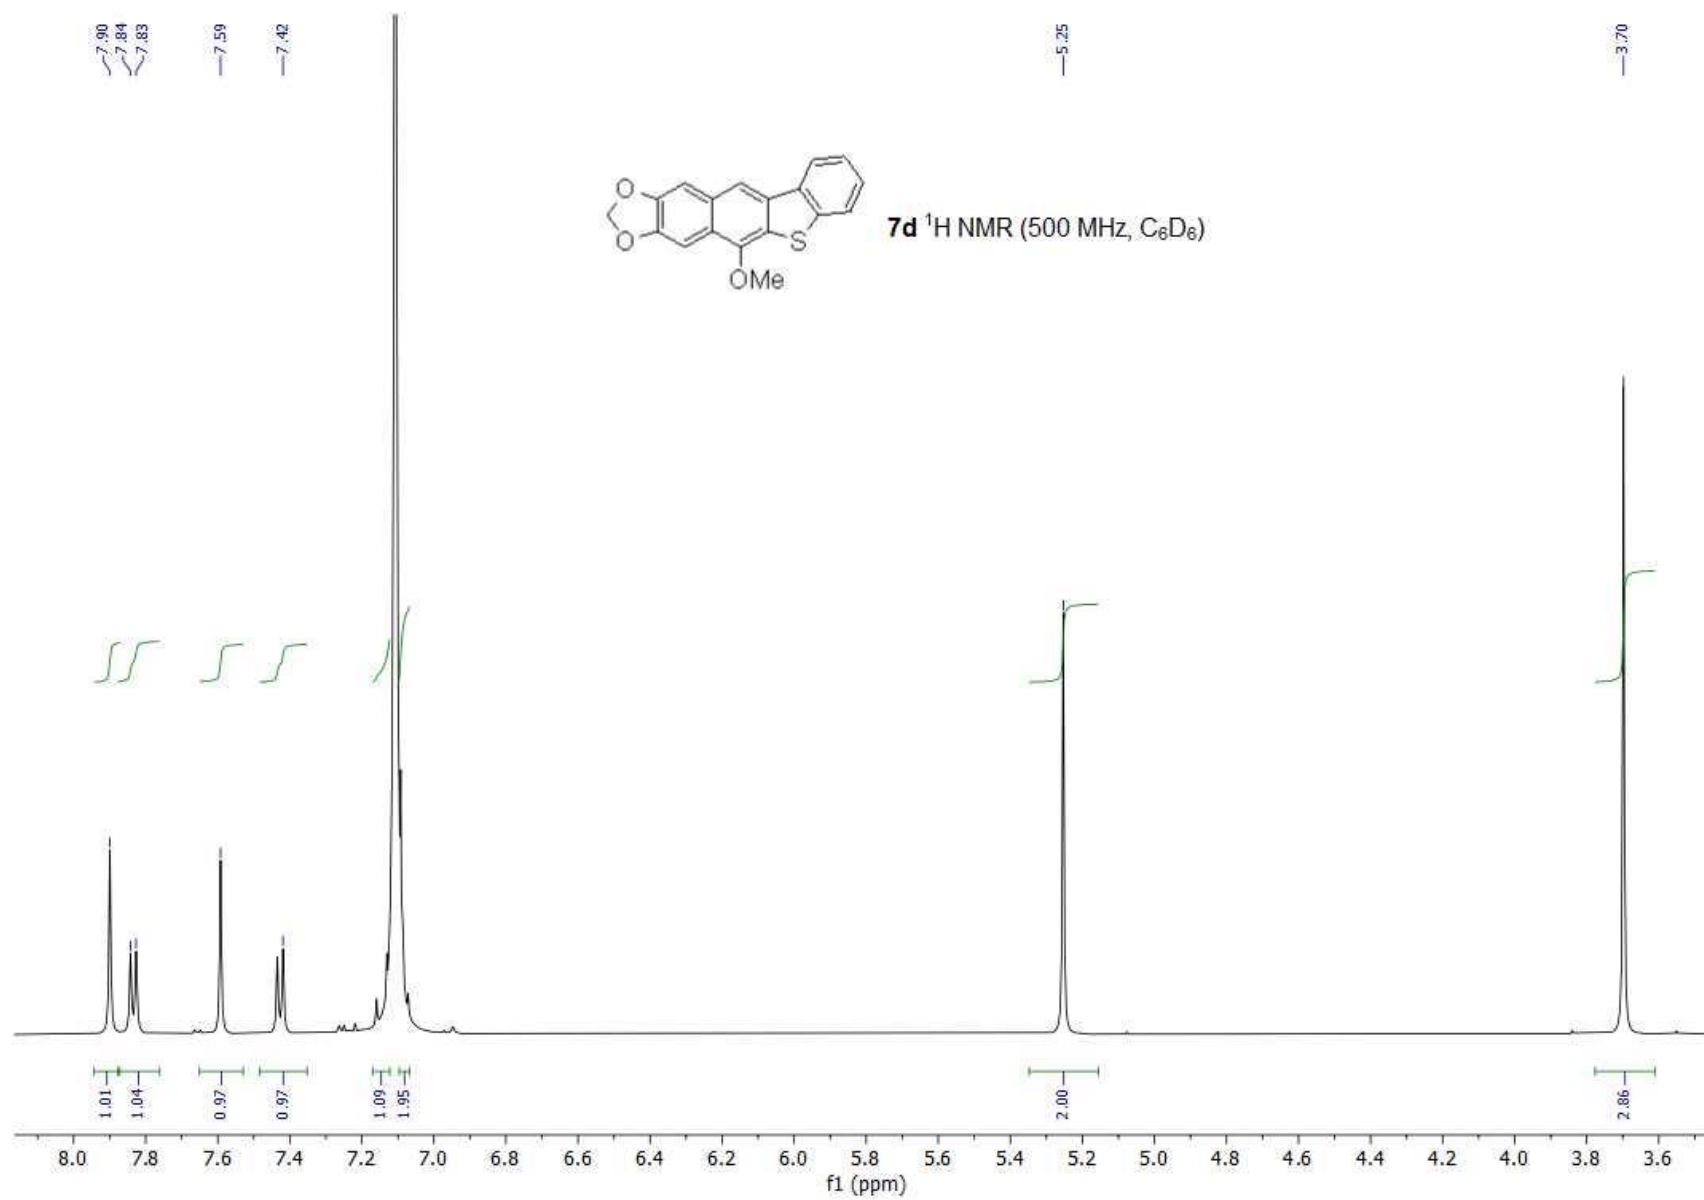

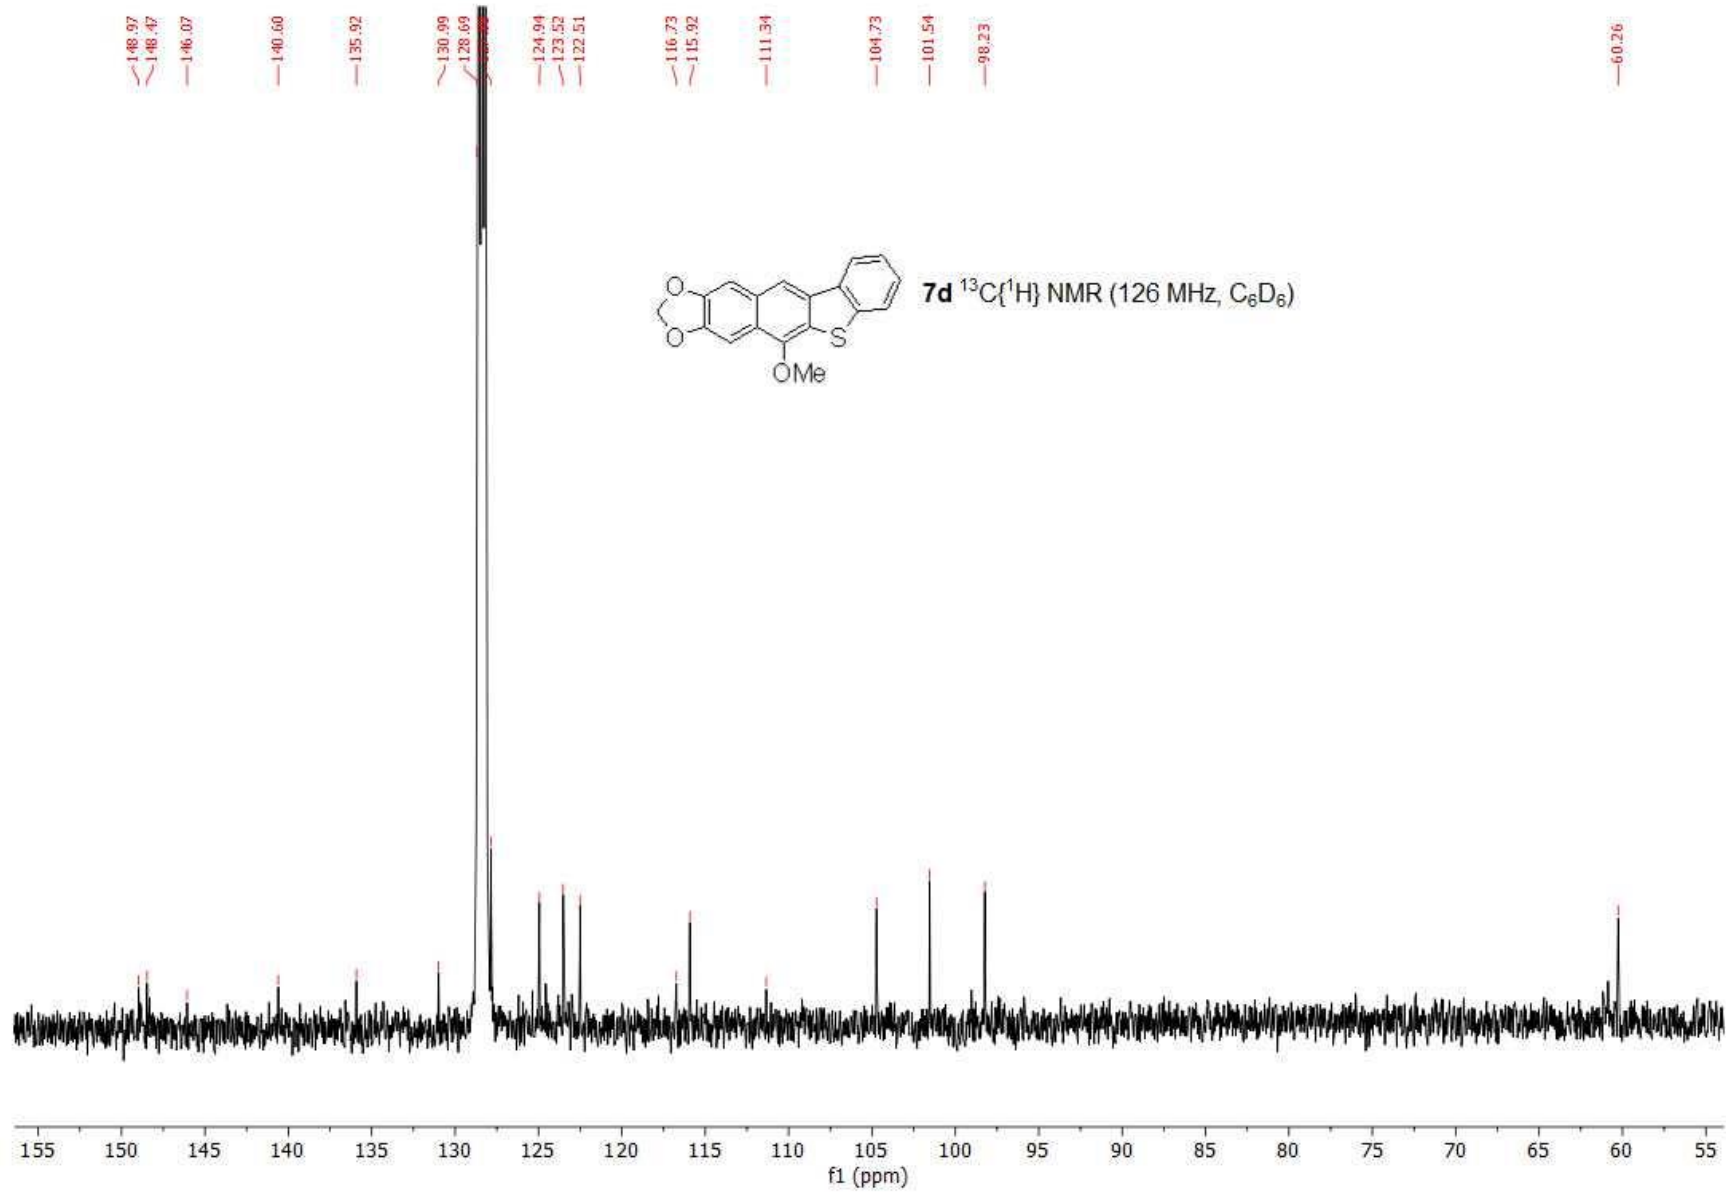

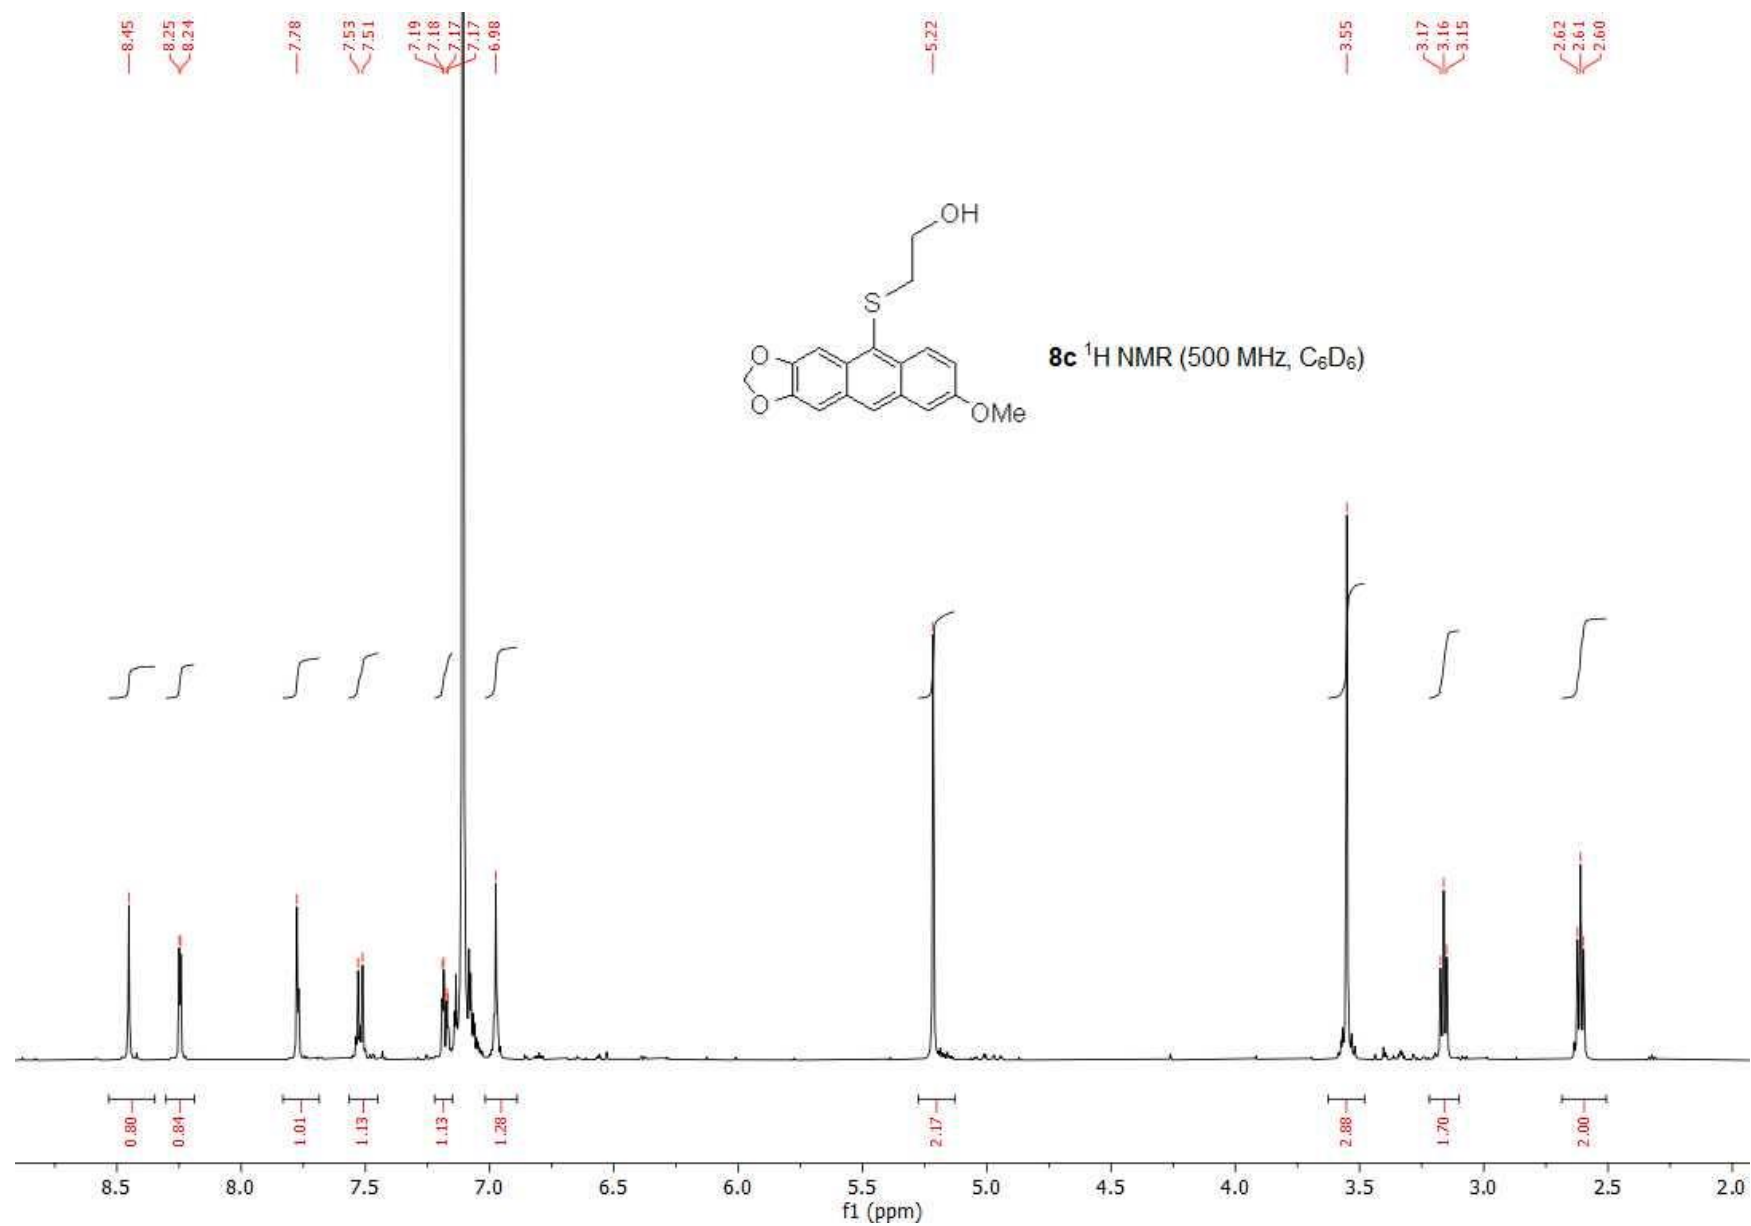

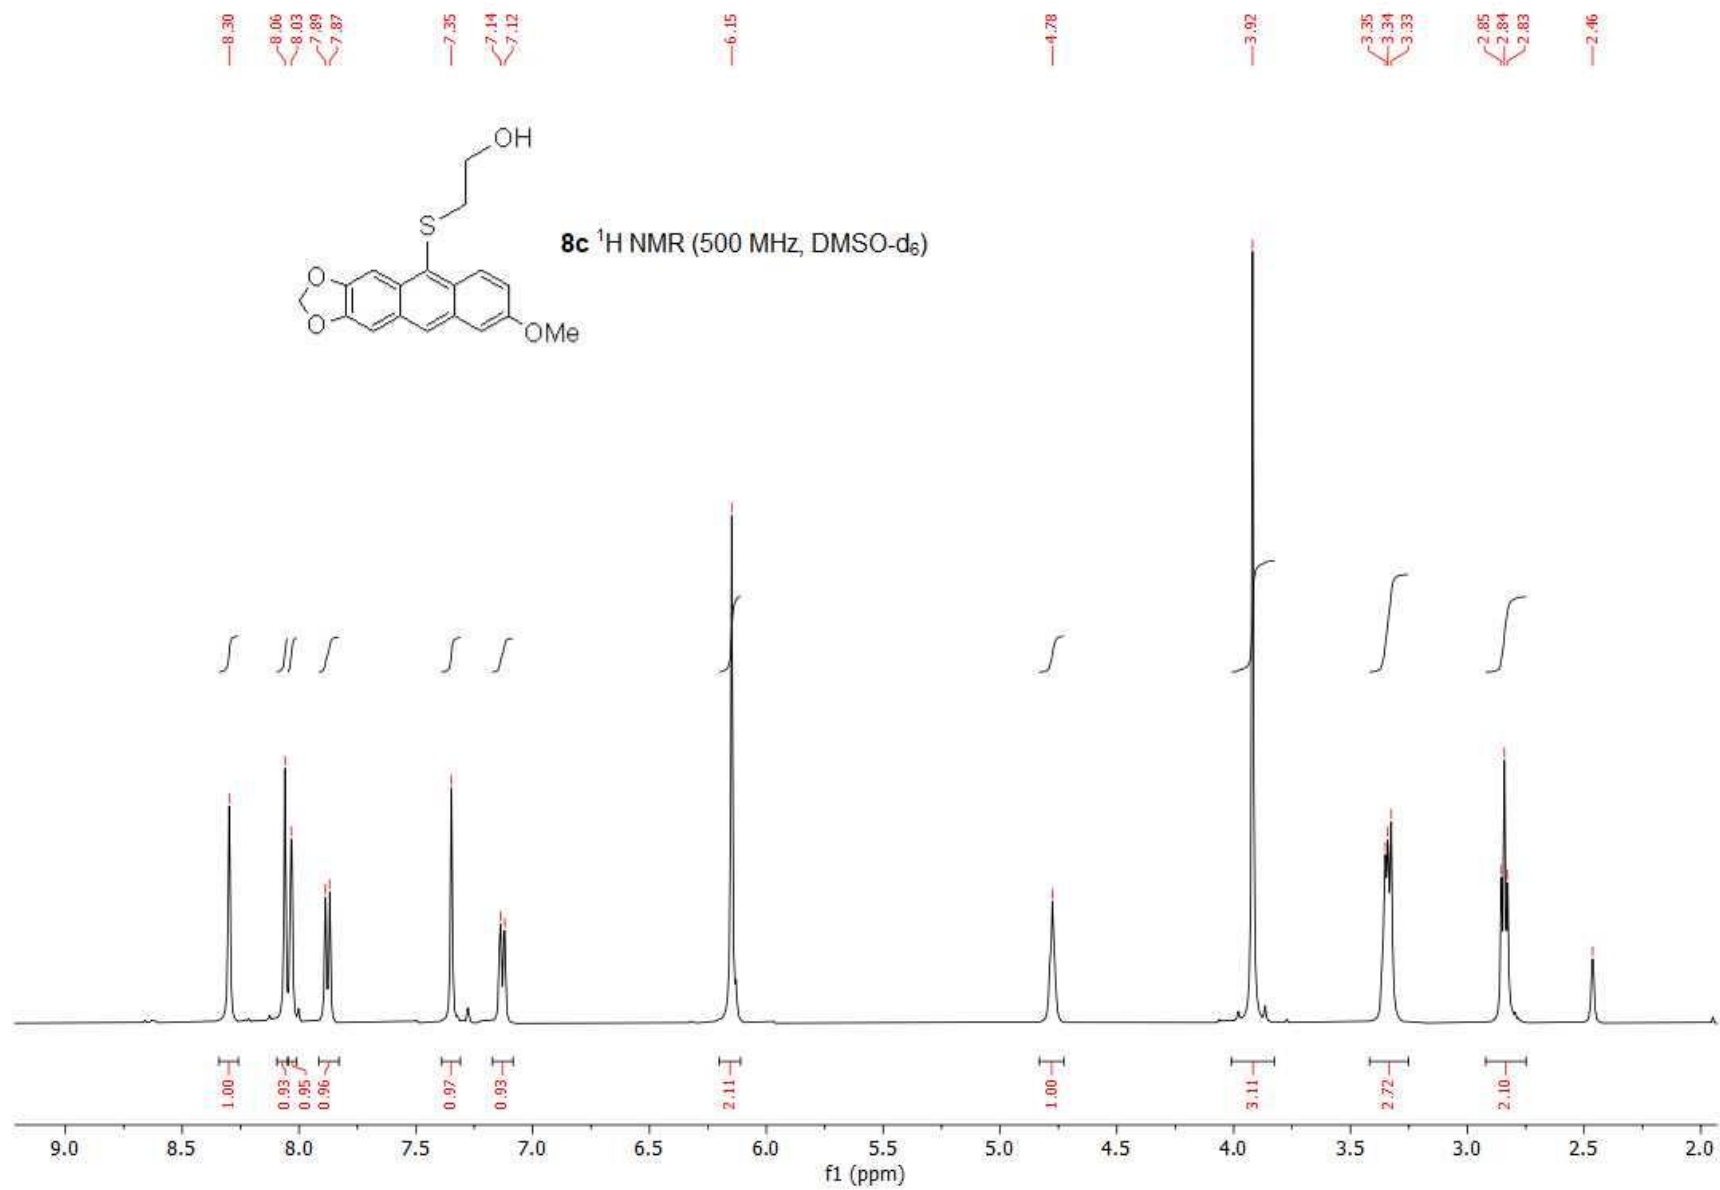

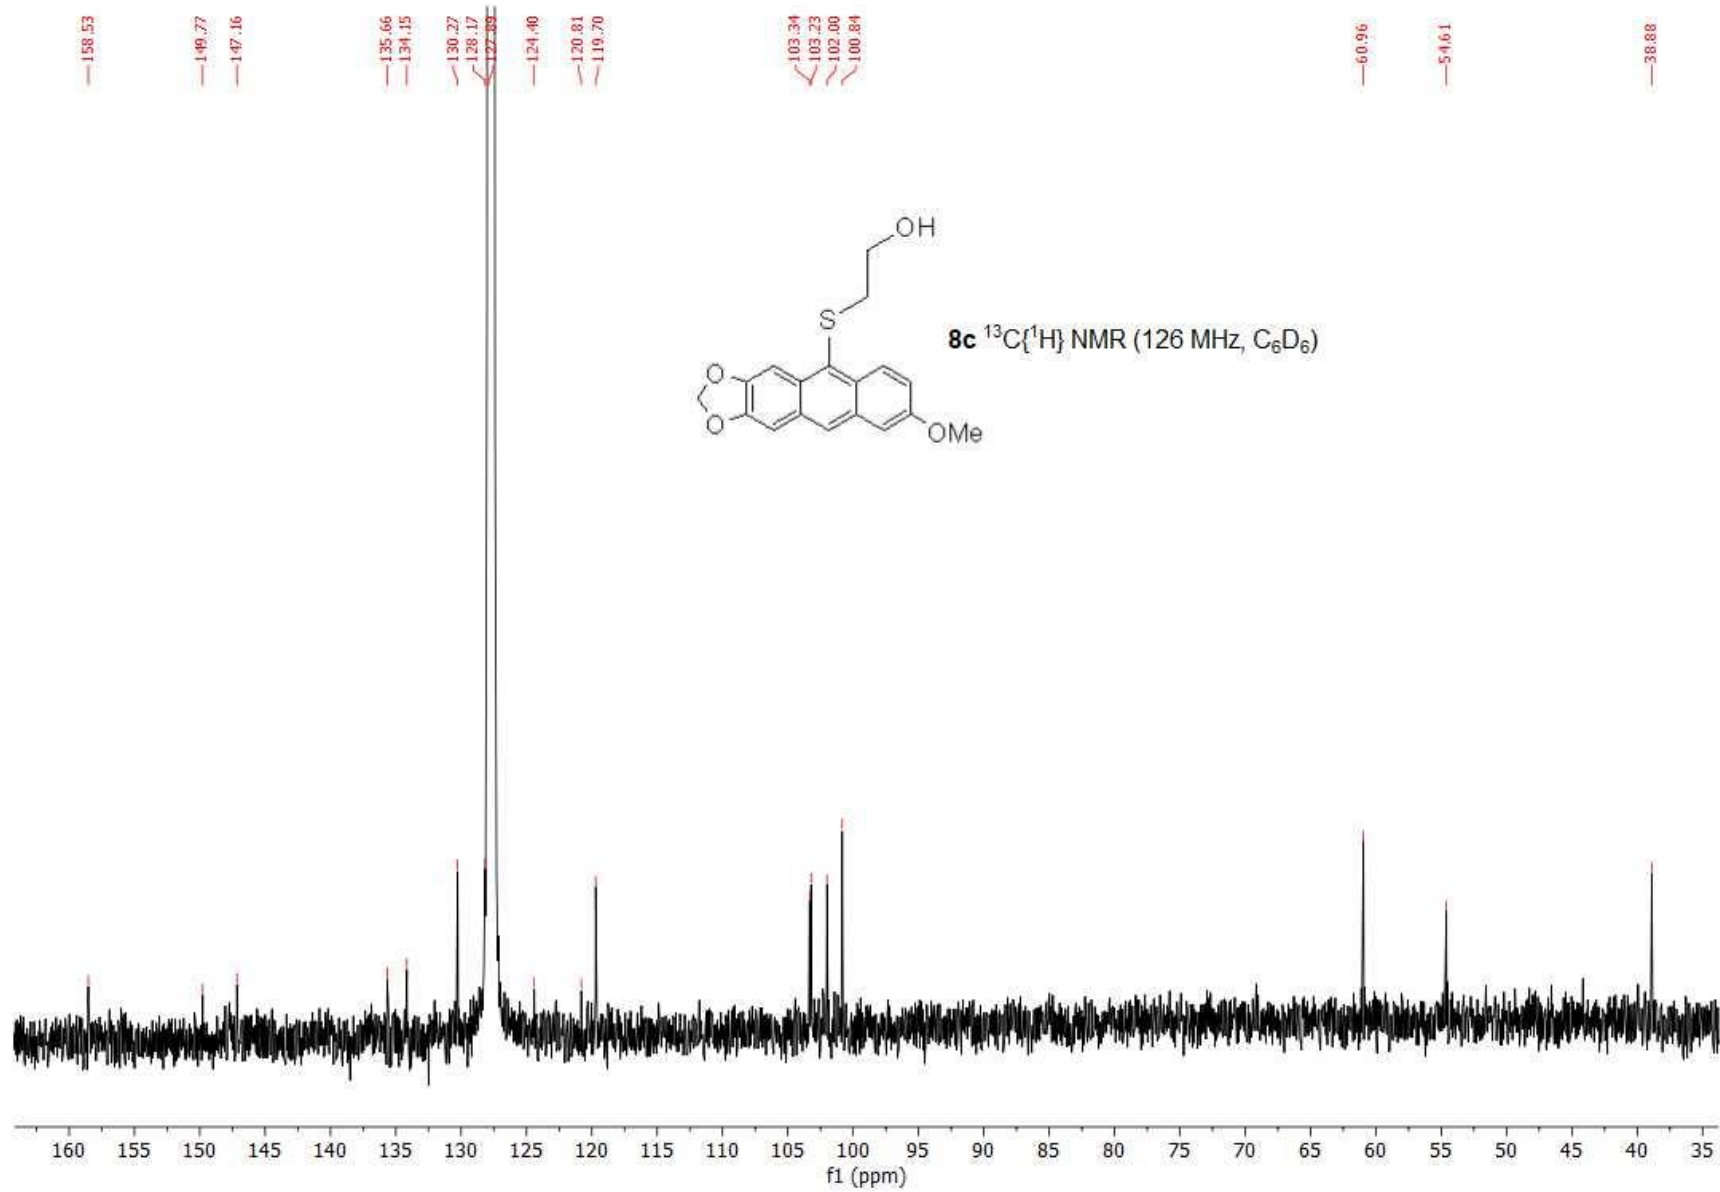

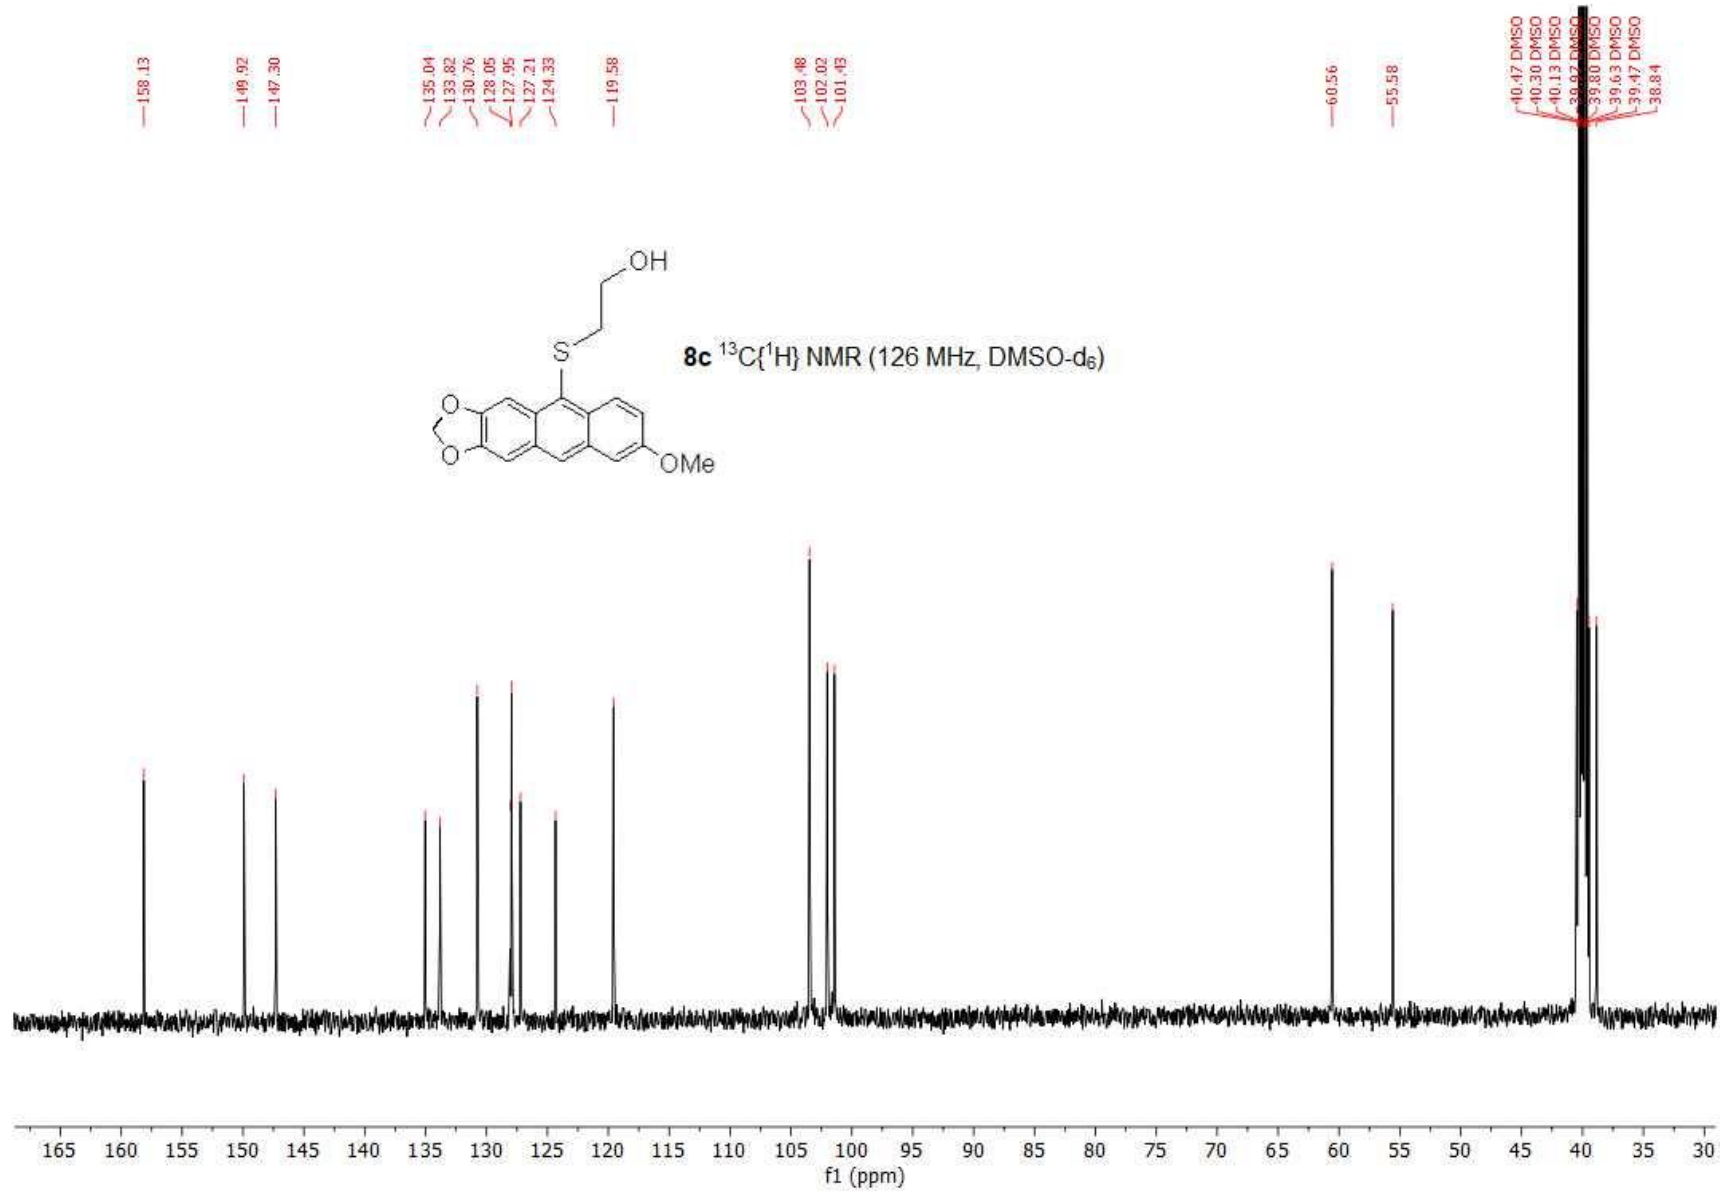

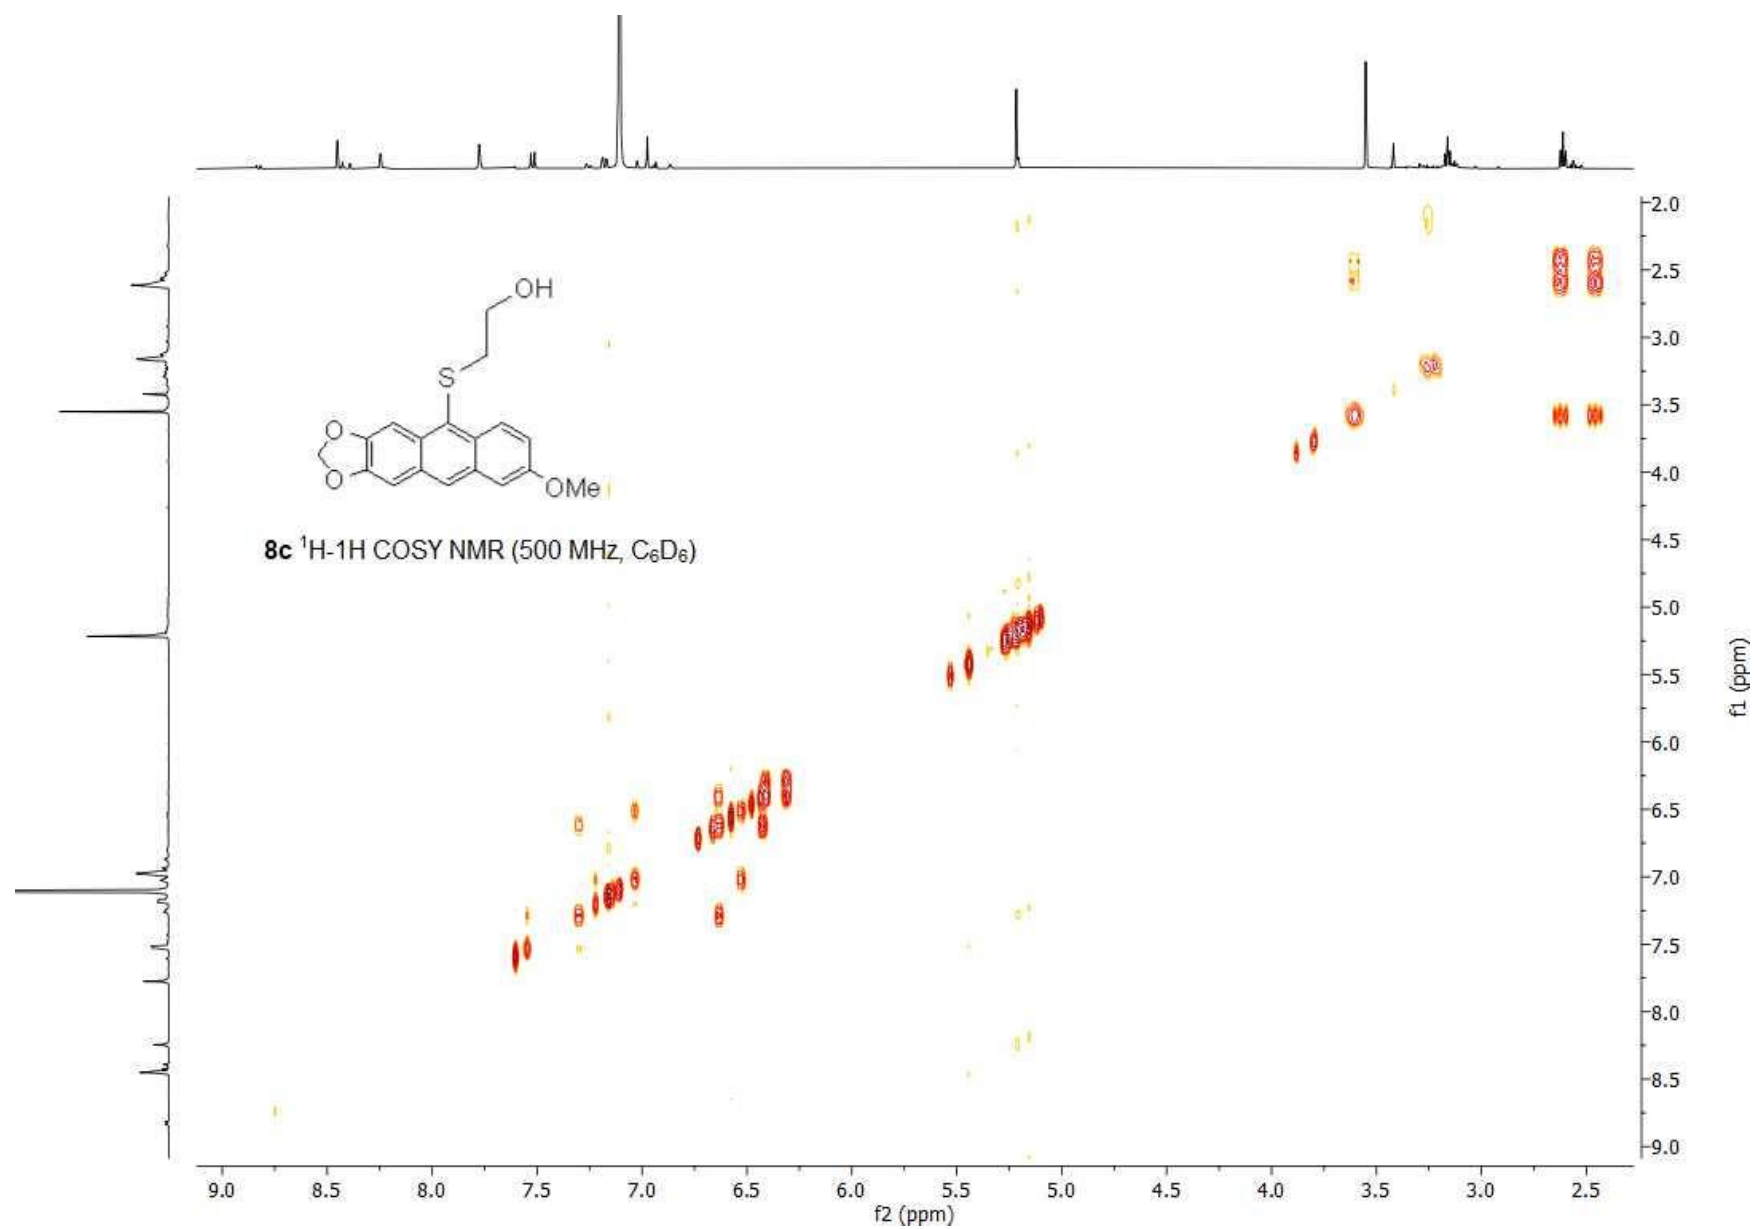

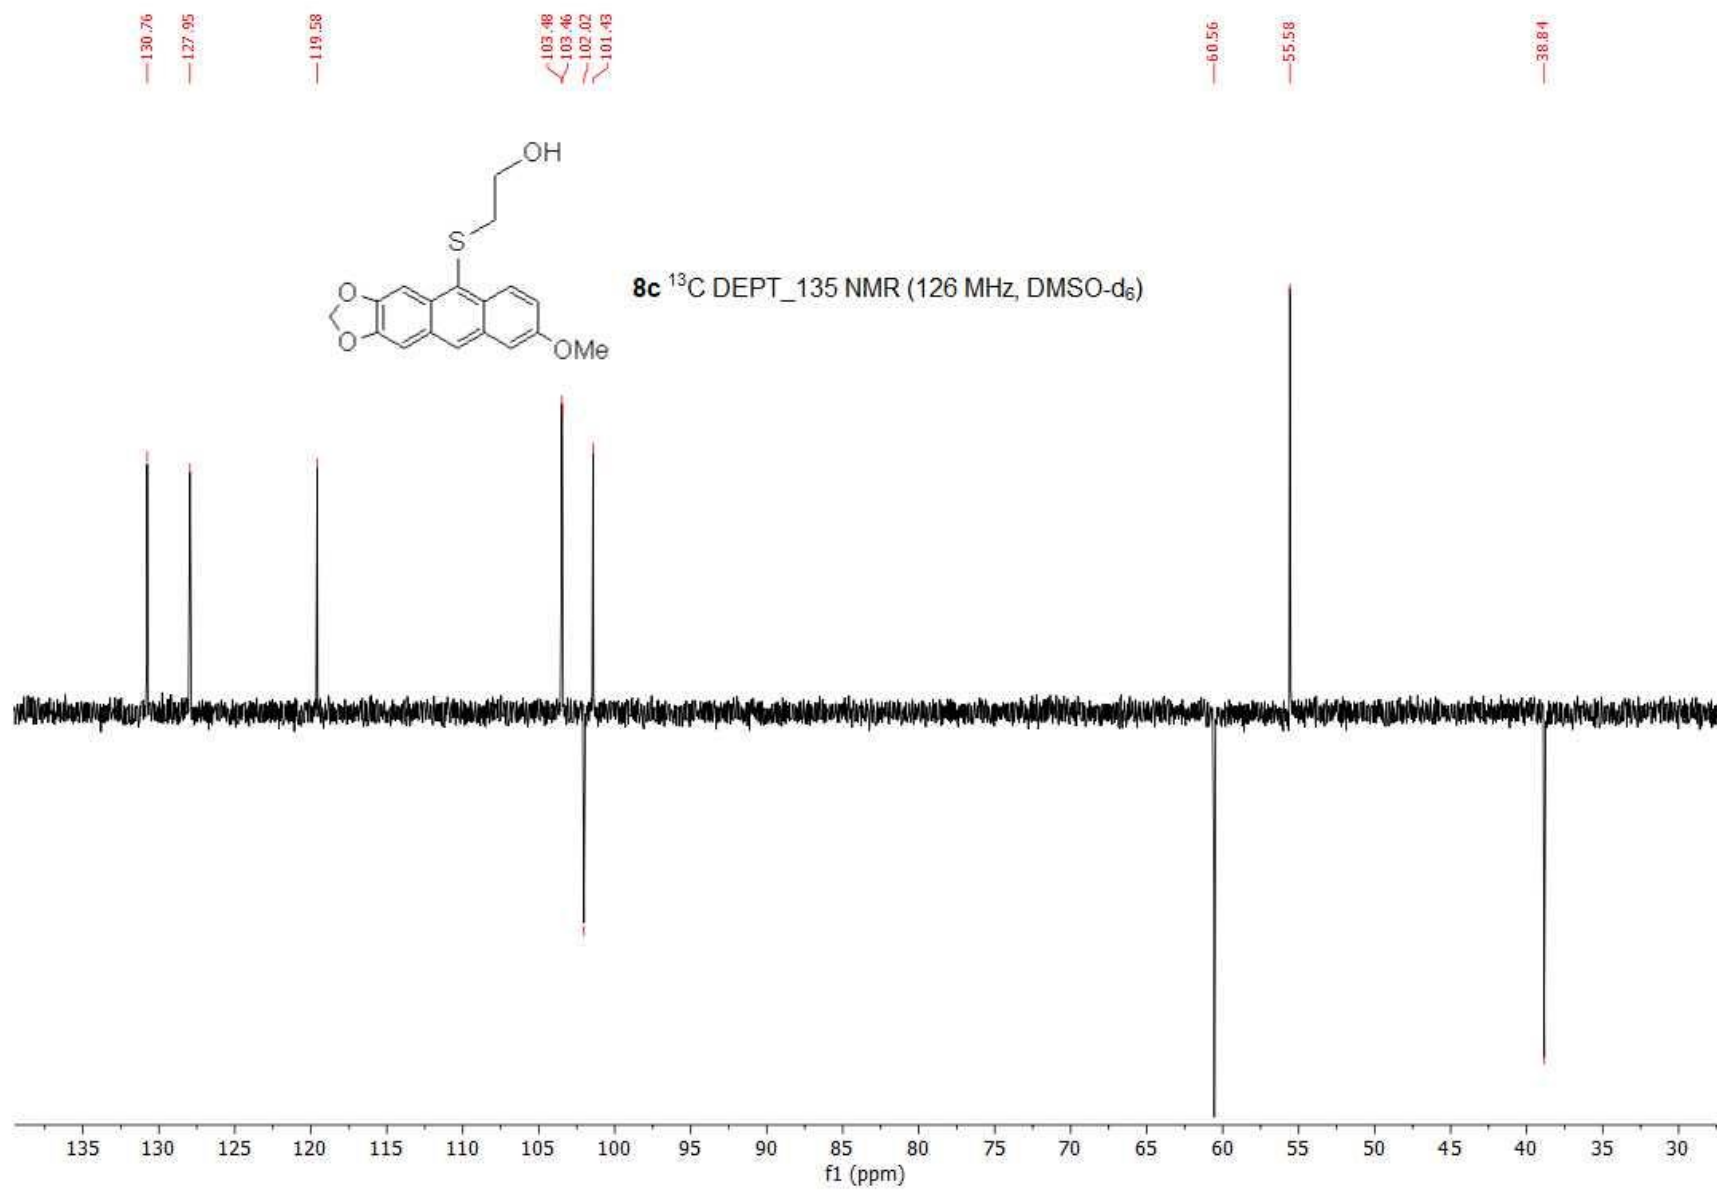



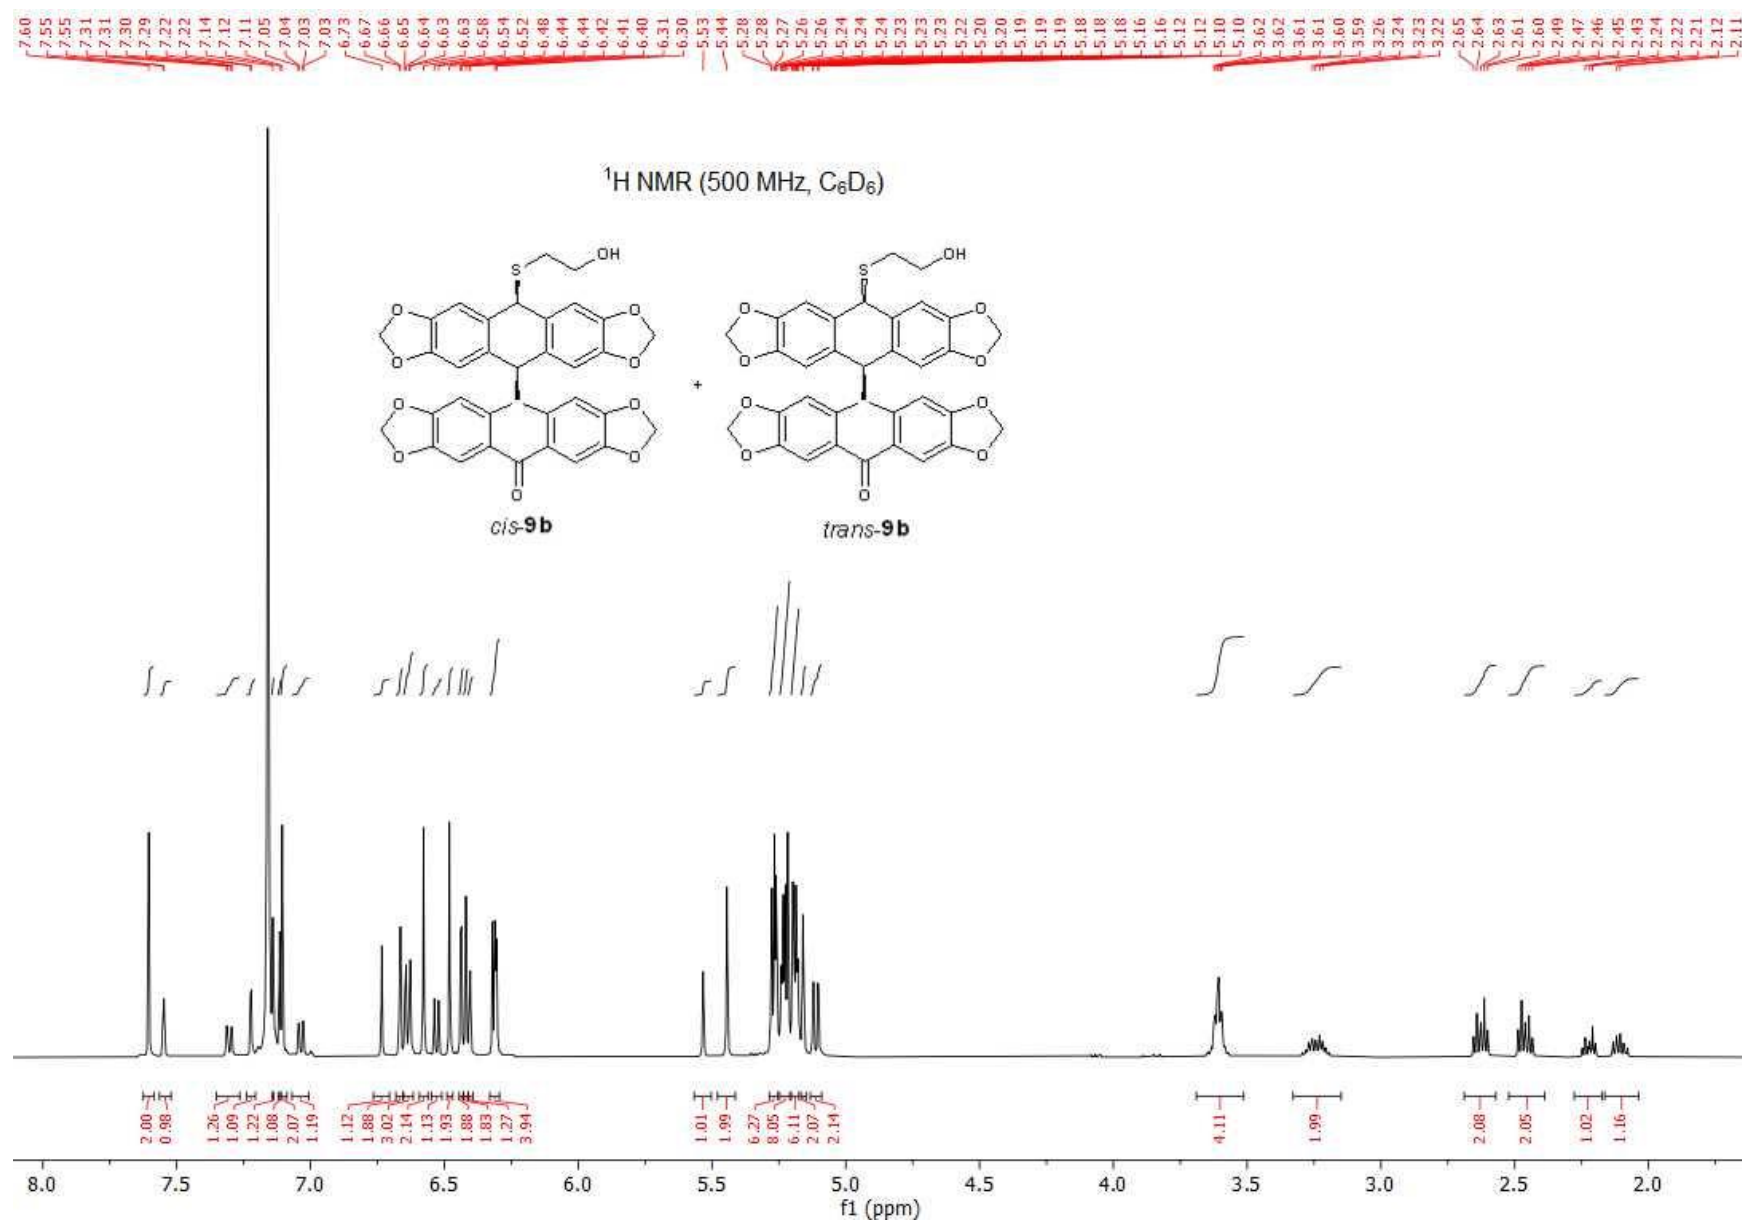

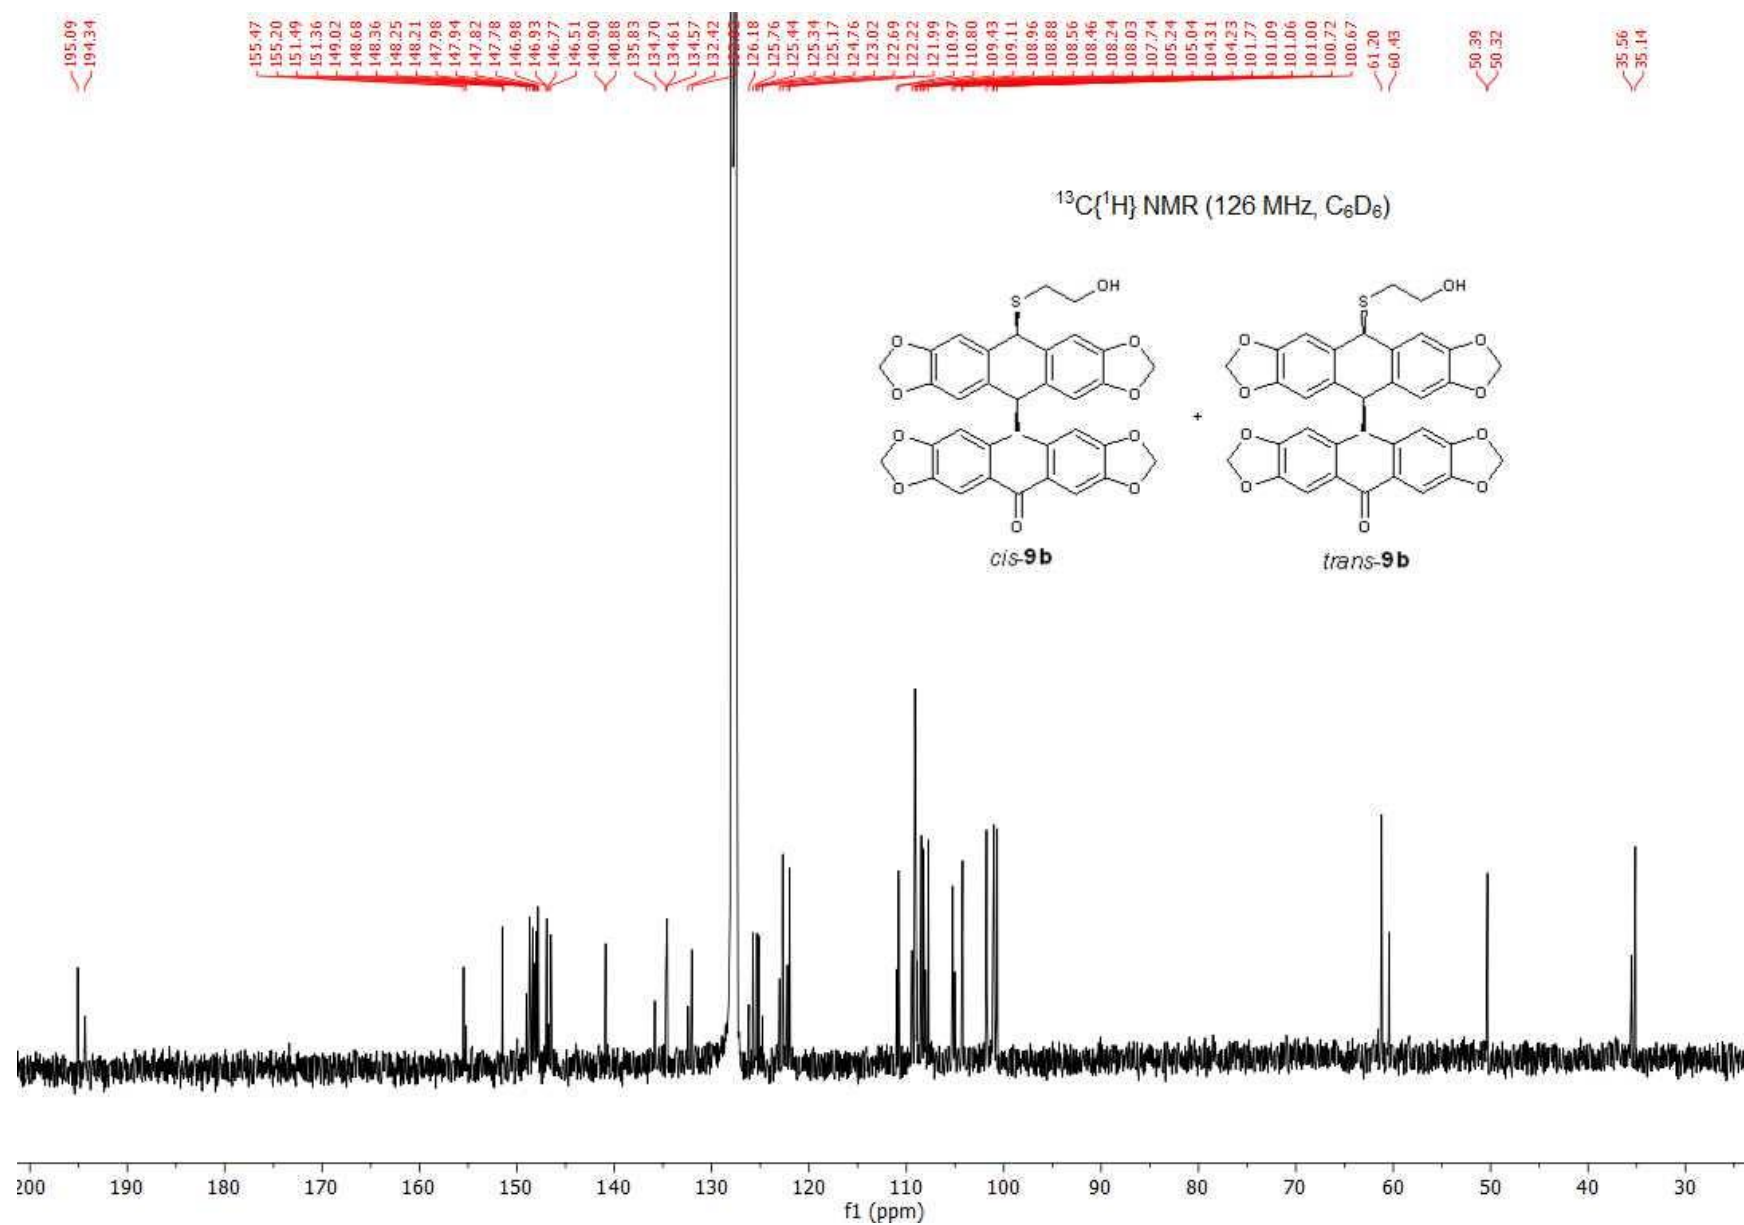

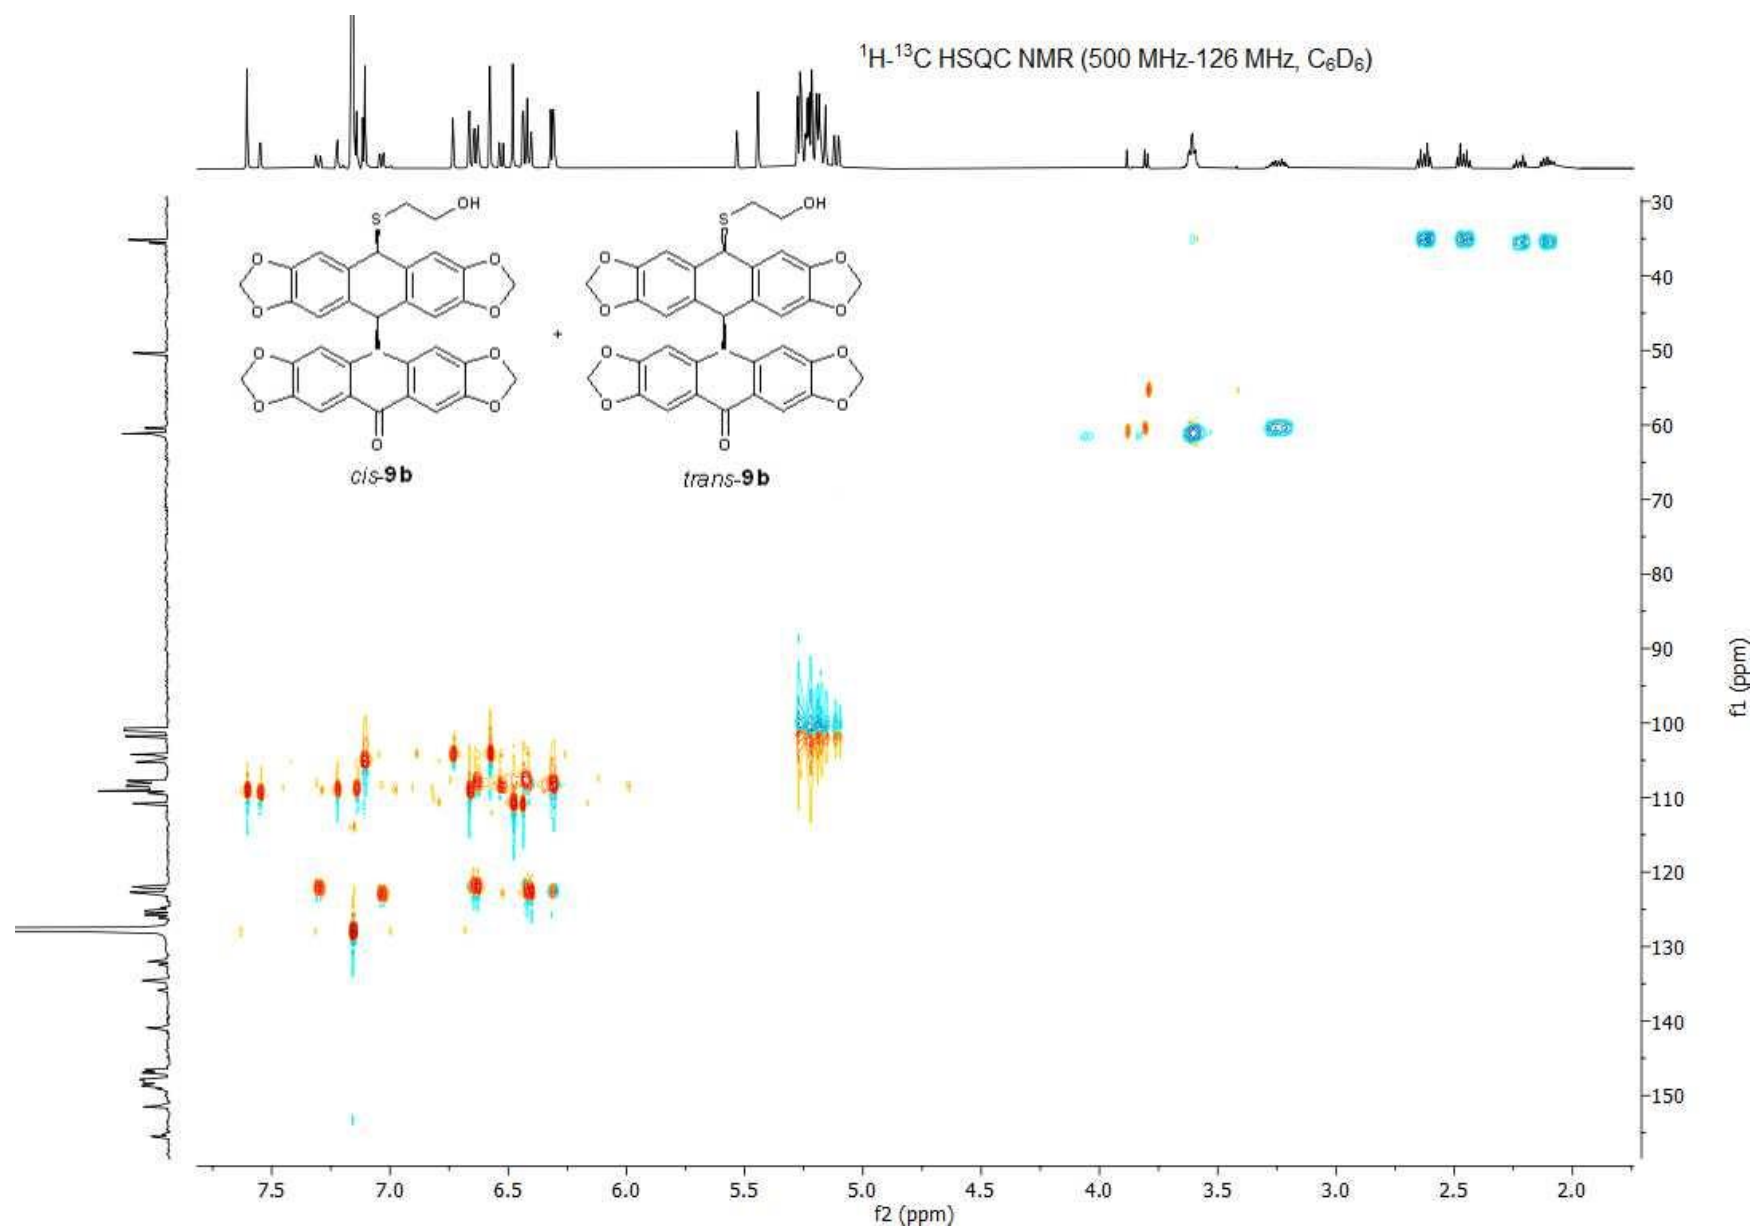

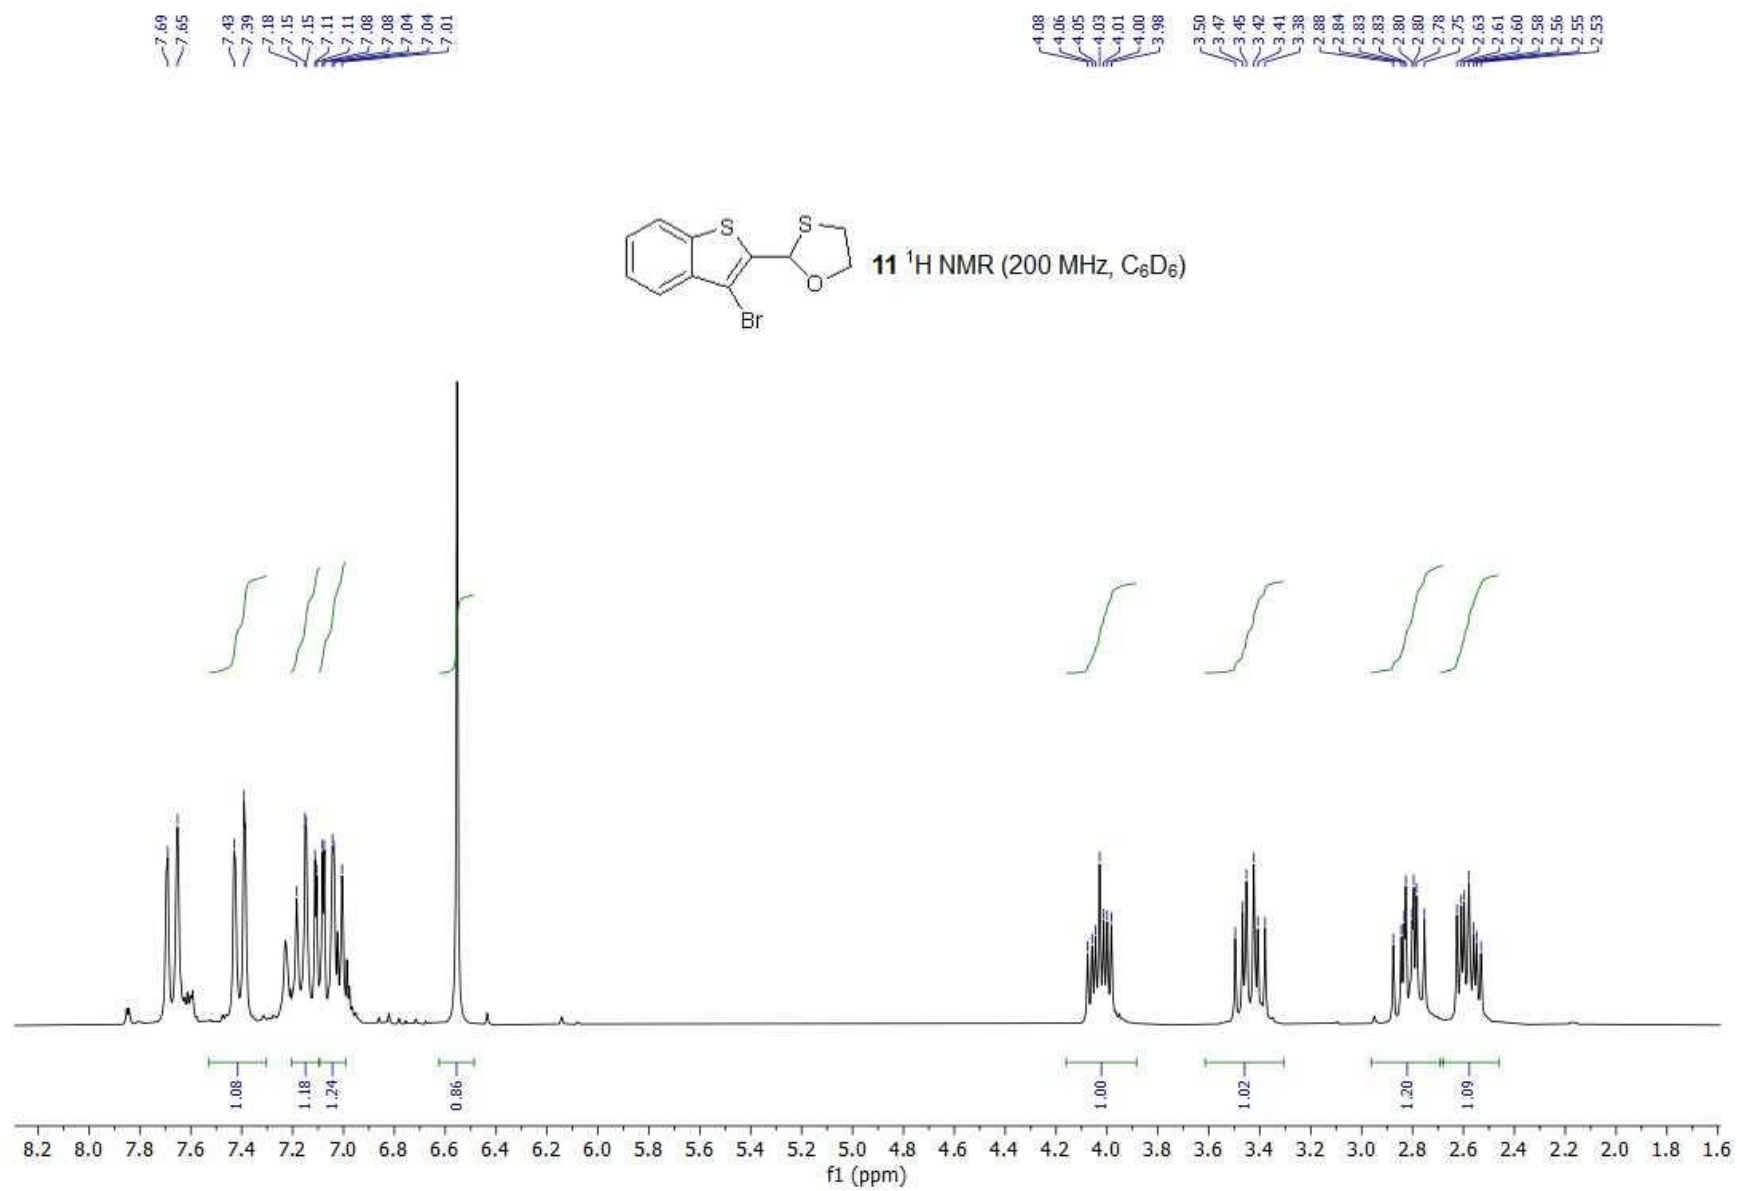

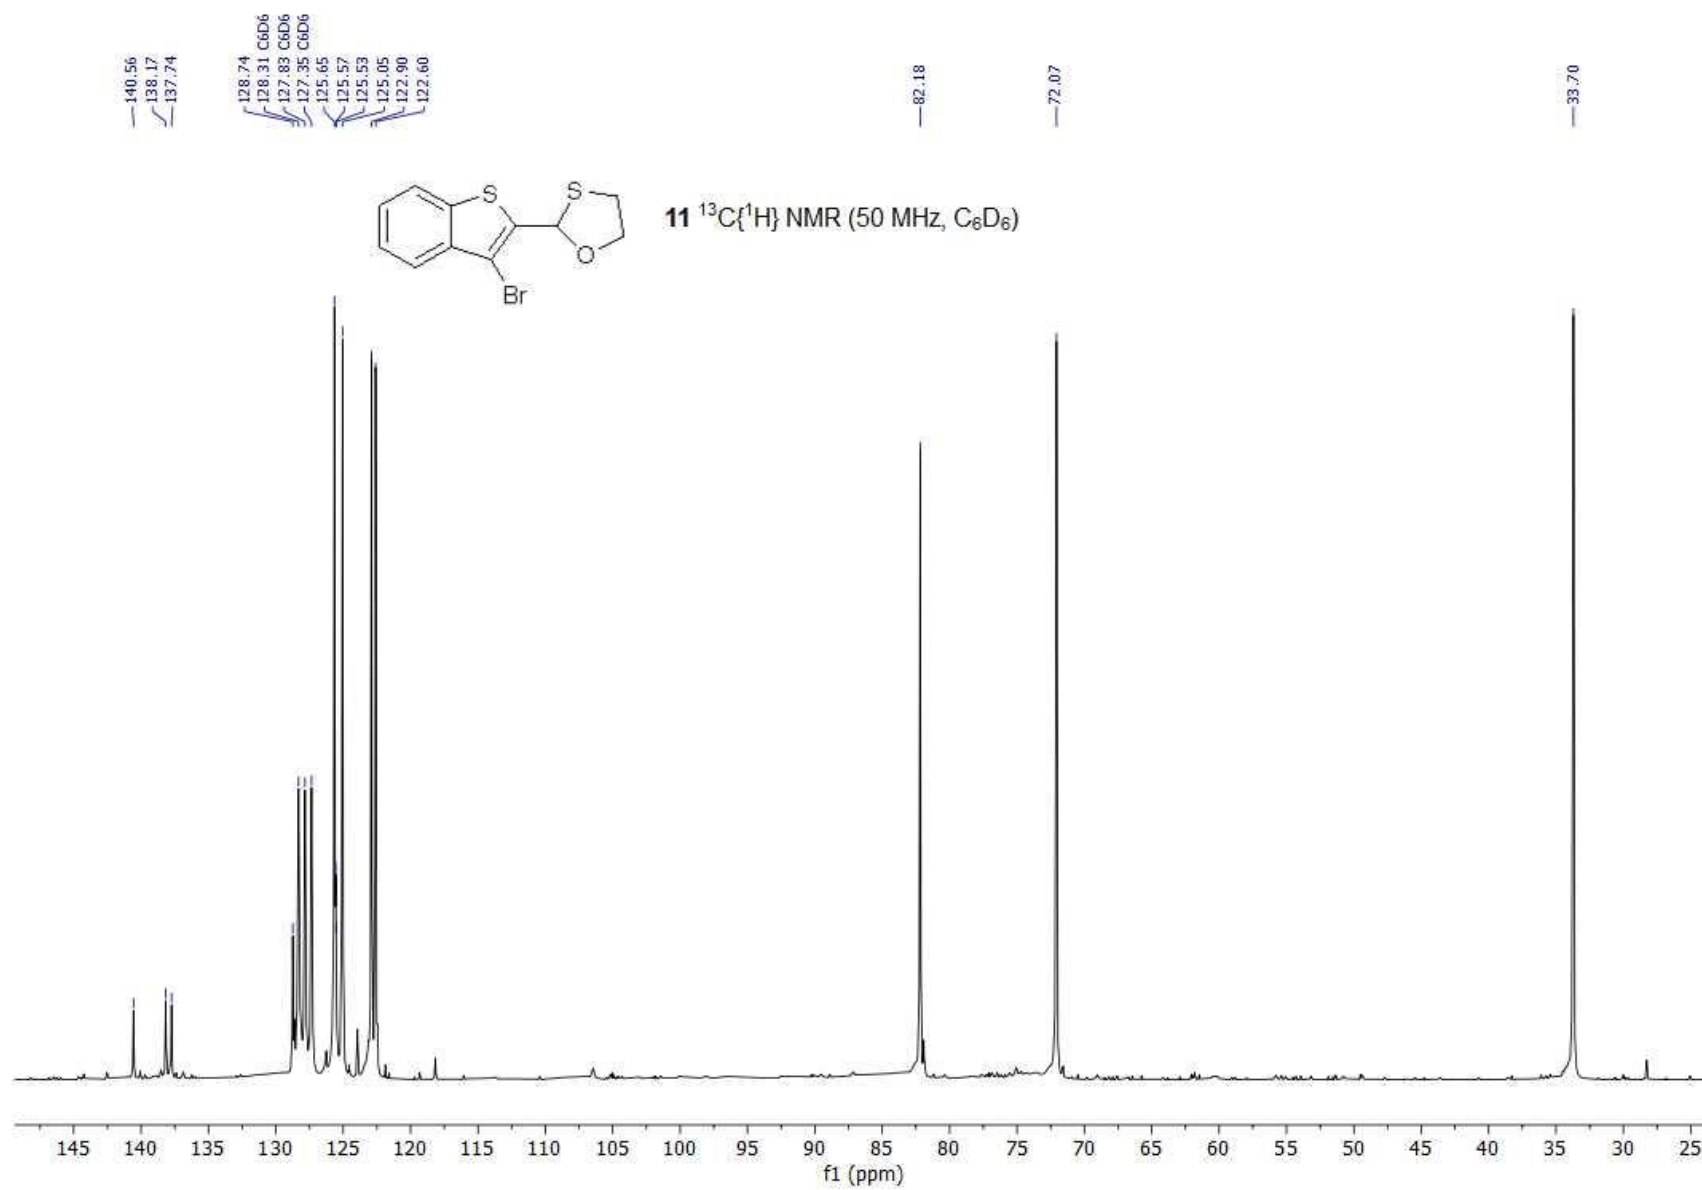

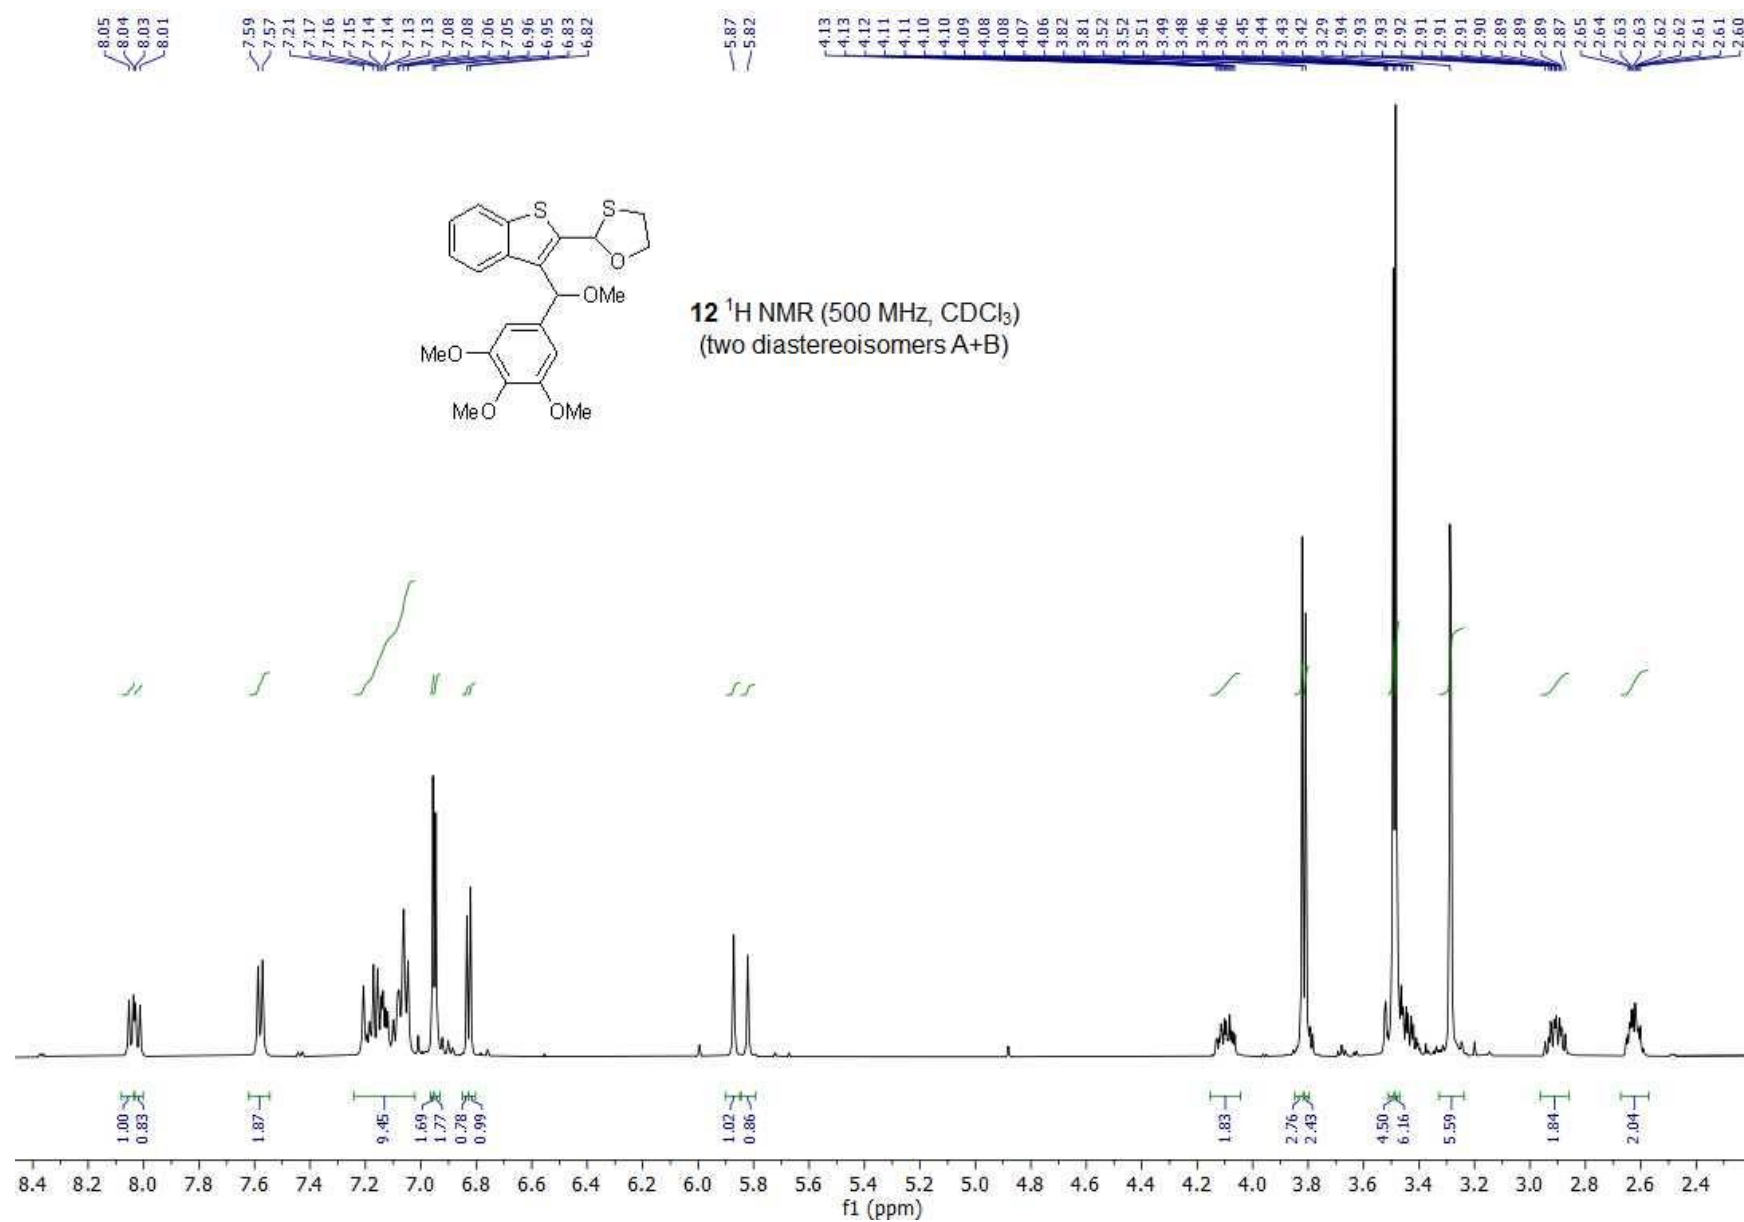

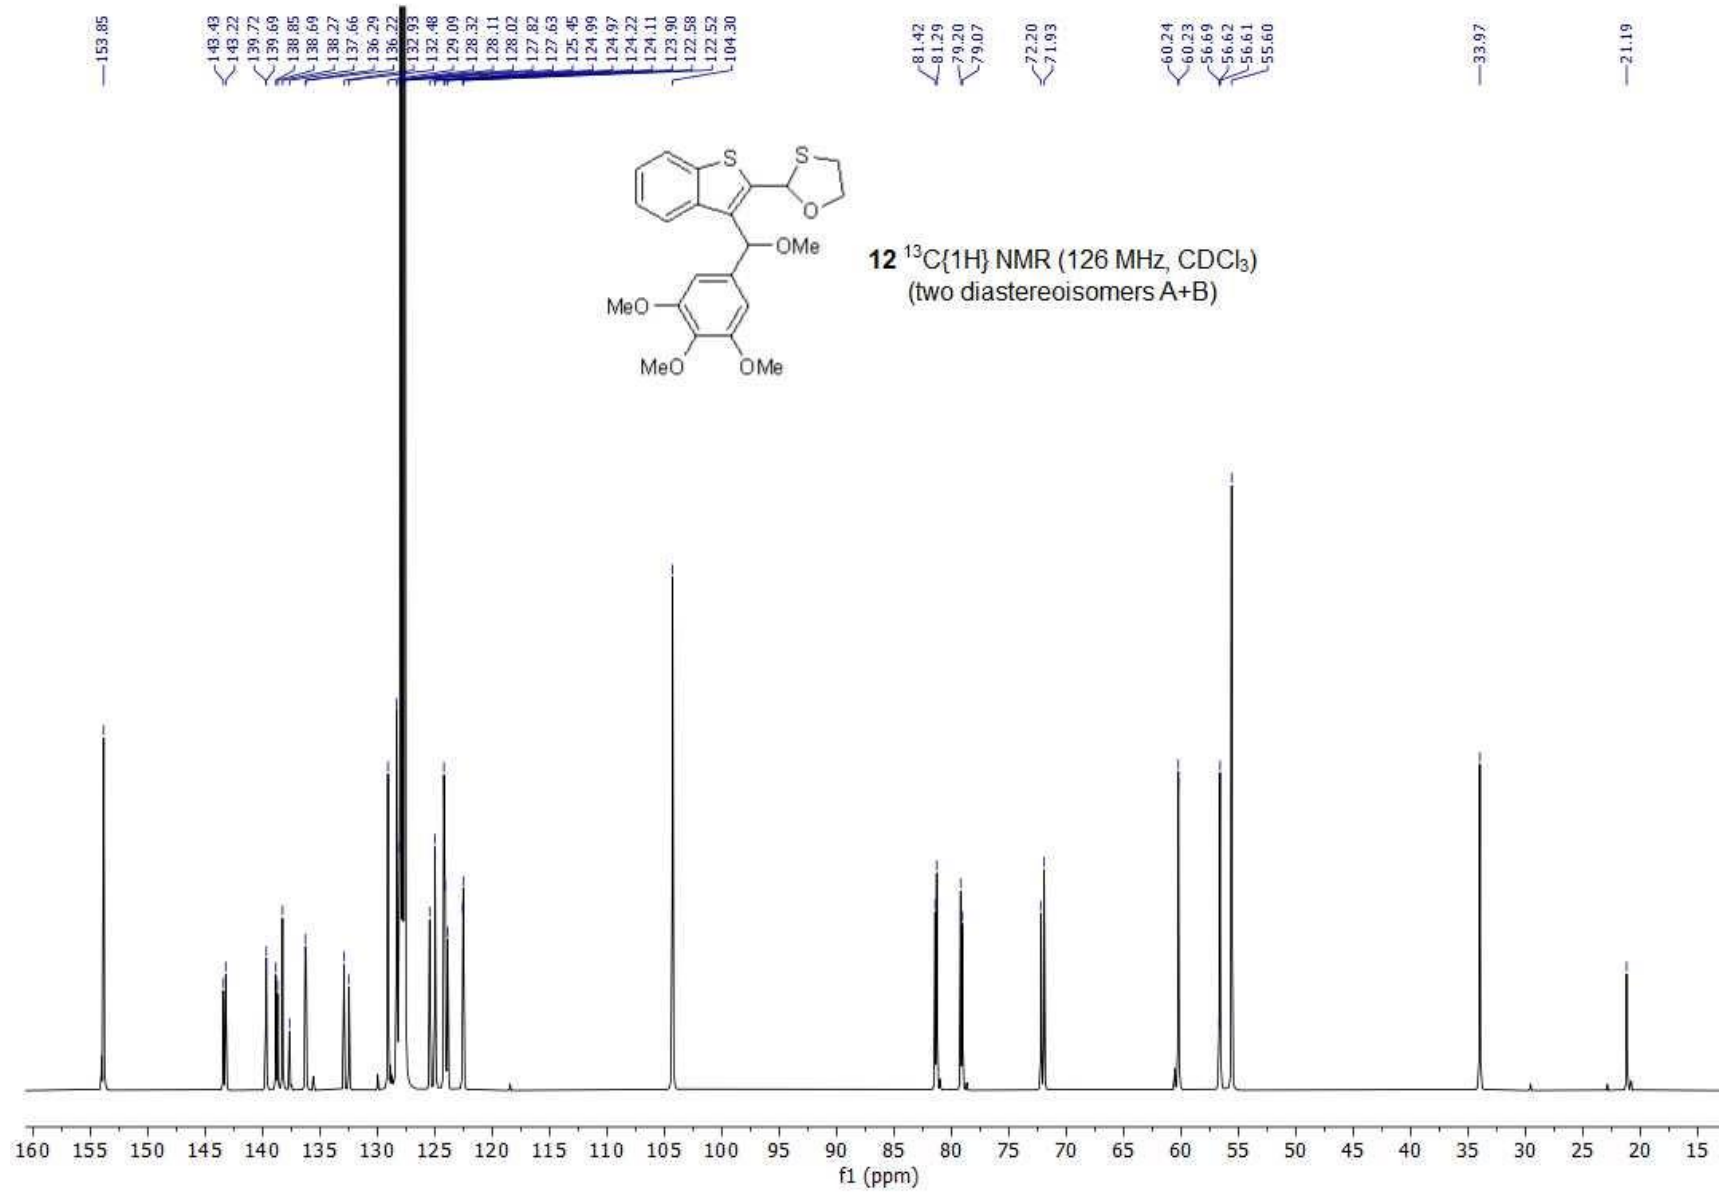

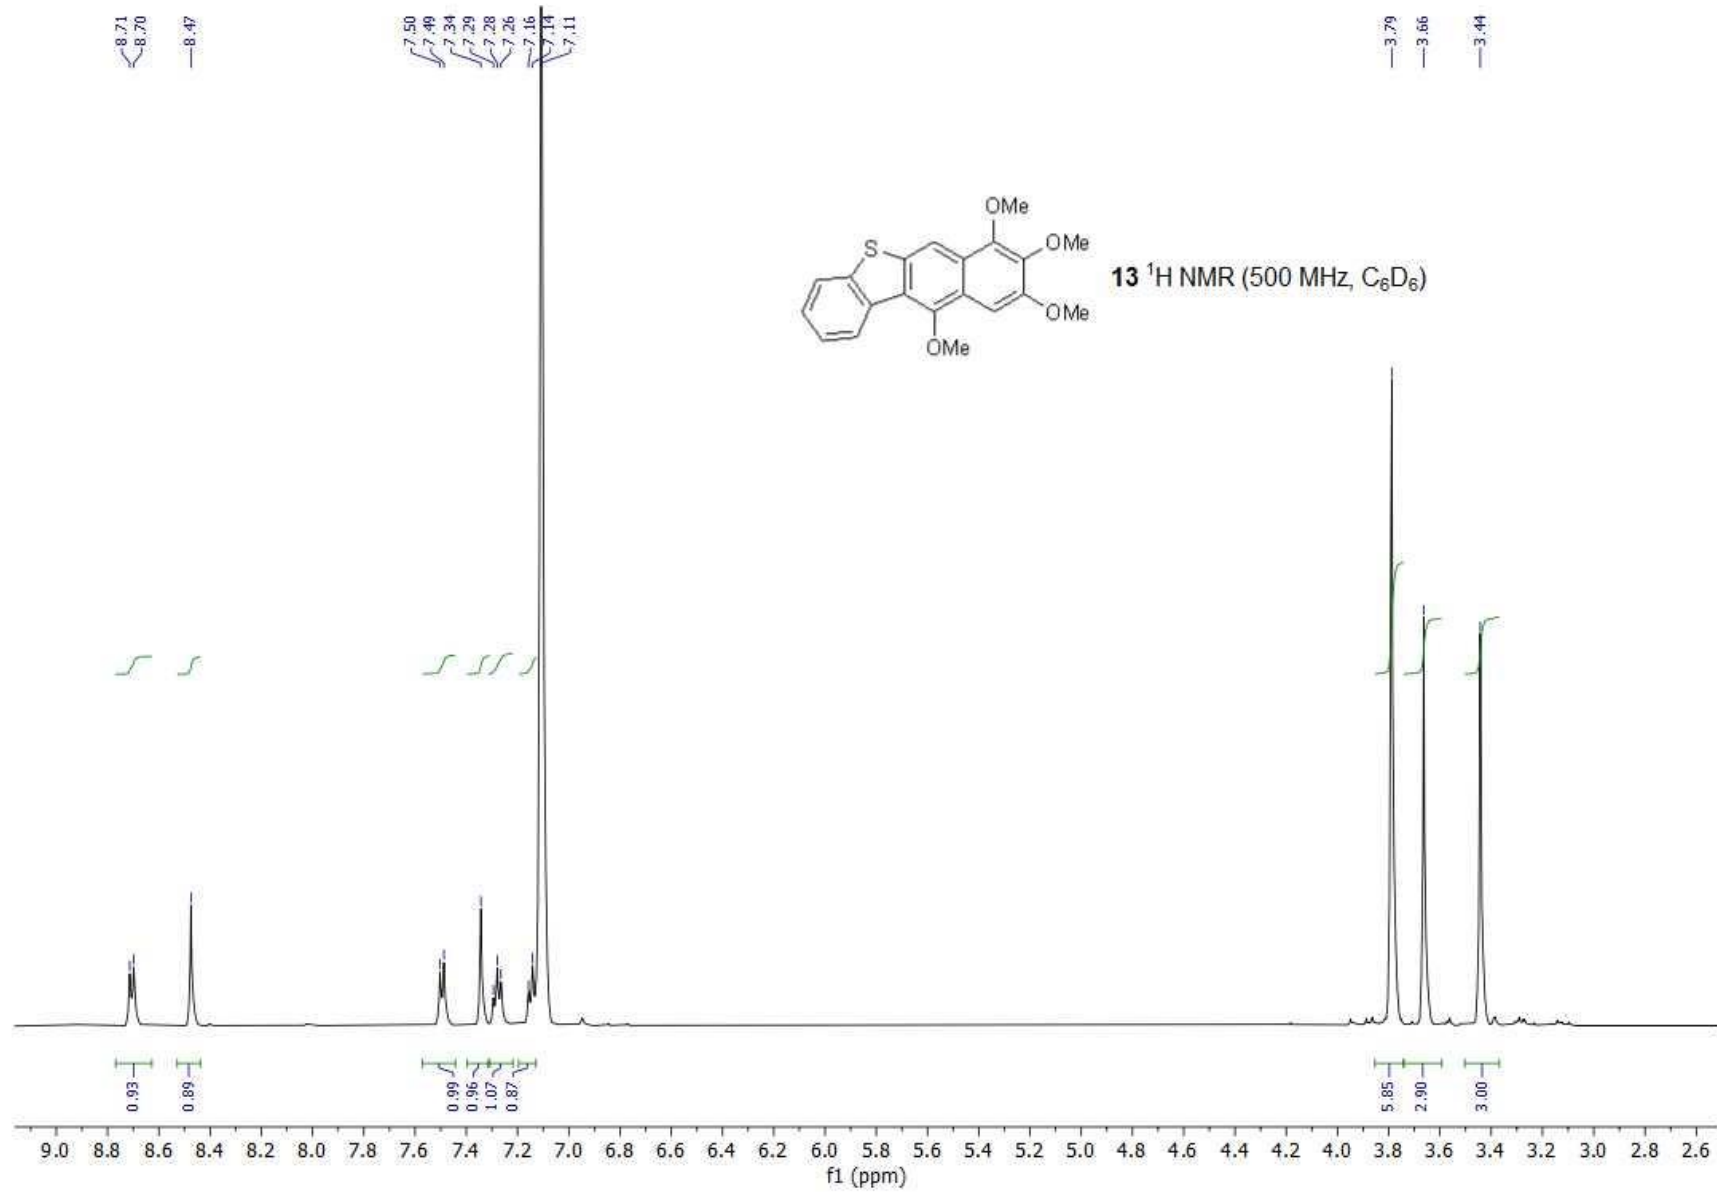



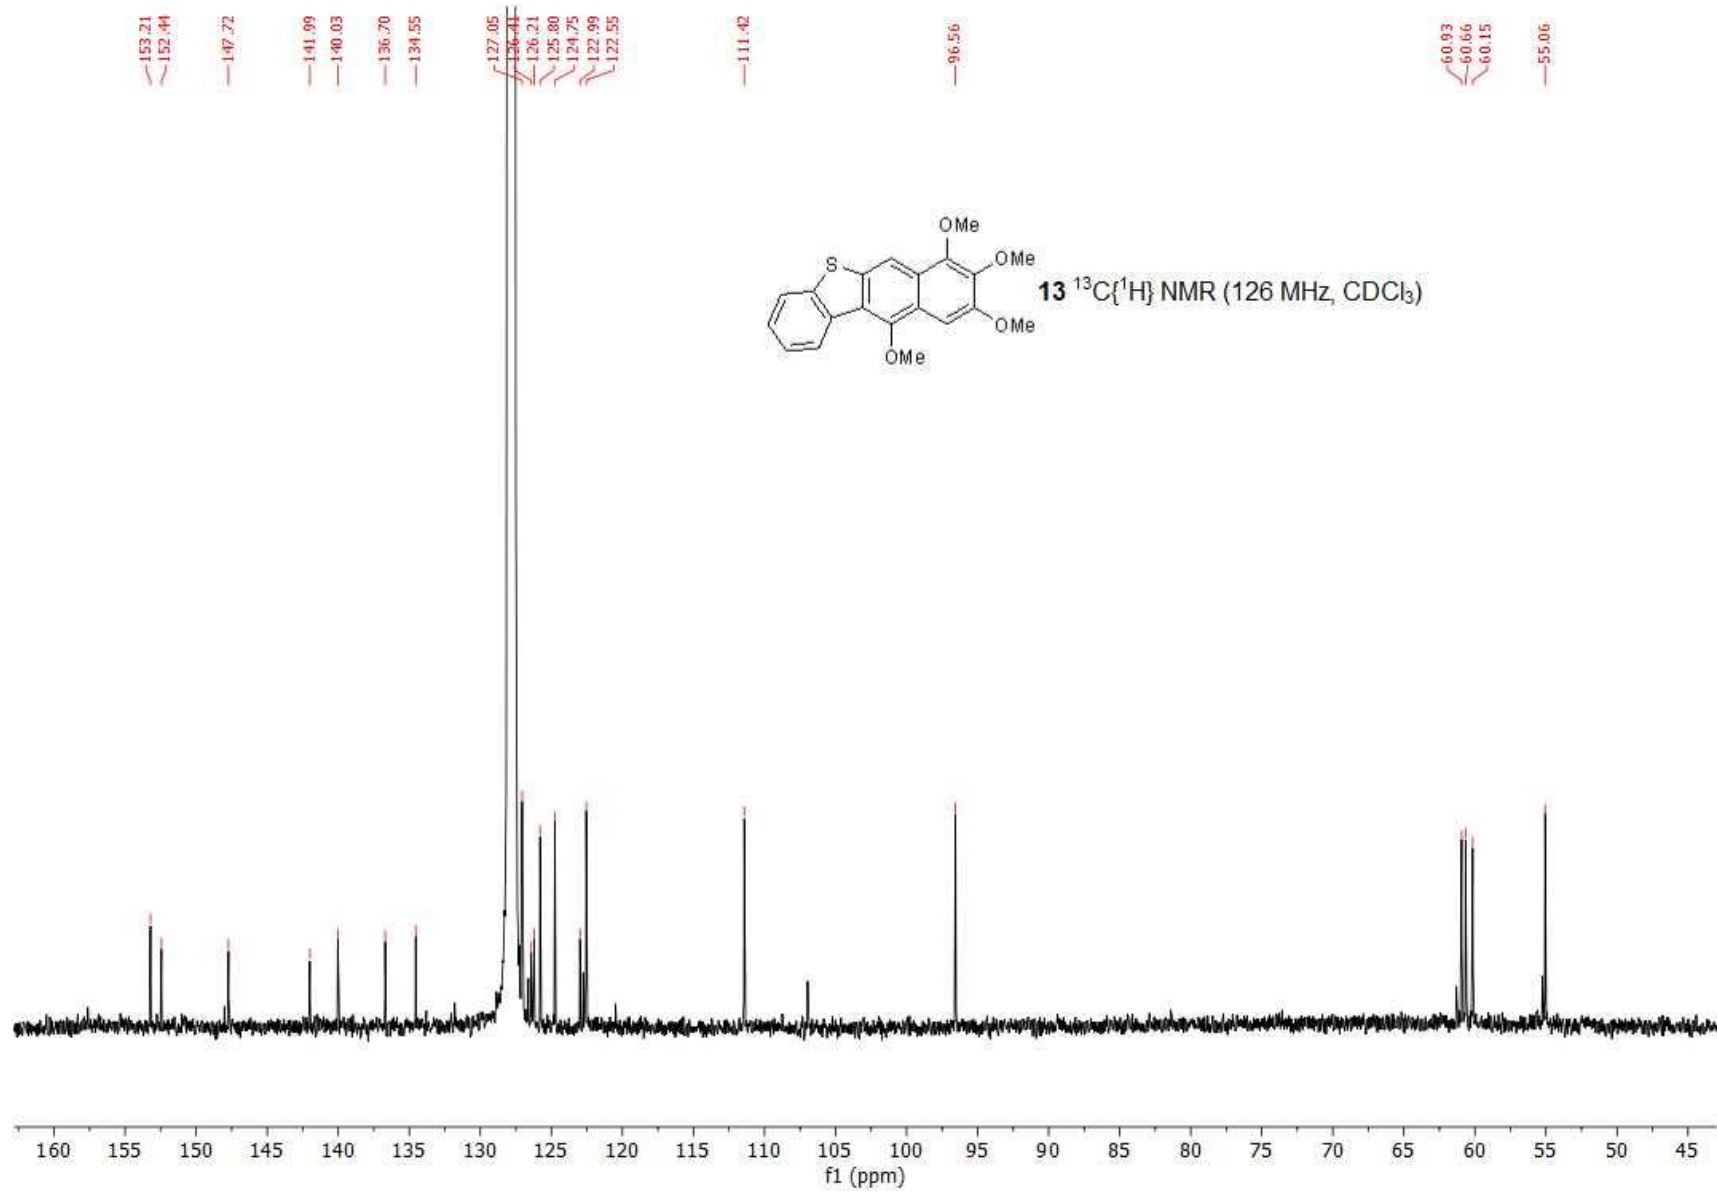

## Crystal structure determination

X-ray diffraction data for **13** were collected using an Oxford Diffraction Xcalibur Sapphire 3 diffractometer with CuK $\alpha$  radiation. The structures were solved by direct methods and refined by full-matrix least-squares on  $F^2$  with SHELXL-2014<sup>1</sup>. The carbon, oxygen and sulphur atoms were refined anisotropically. All aromatic H atoms and H atoms of methyl groups were positioned geometrically and constrained to ride on their parent atoms, with C–H distances of 0.93 and 0.96 Å, respectively, and with  $U_{\text{iso}}(\text{H}_{\text{aromatic}})$  and  $U_{\text{iso}}(\text{H}_{\text{methyl}})$  values of  $1.2 U_{\text{eq}}(\text{C}_{\text{aromatic}})$  and  $1.5 U_{\text{eq}}(\text{C}_{\text{methyl}})$ . Details of data collections and structure refinements have been deposited with the Cambridge Crystallographic Data Centre as supplementary publication number CCDC 1475147.

## Calculations

The molecular and electronic structures of *cis*-**9b**, *trans*-**9b**, **5b**, **16a** and **16b** were calculated by DFT method using the gradient corrected three-parameter hybrid functional (B3LYP) with the 6-31++G(d,p) (for *cis*-**9b** and *trans*-**9b**) and 6-311++G(d,p) basis sets (for **5b**, **16a** and **16b**). Full geometry optimizations of compounds in the gas phase were performed using its starting geometries prepared manually. The above computations were performed using GAUSSIAN09 quantum chemistry package. In order to check the structural optimizations, the calculated vibrational frequencies of the compounds were used (no imaginary frequencies). GAUSSIAN09 was also used for the TD-DFT (B3LYP 6-311++G(d,p) calculations performed for **7b**.

The calculations in the framework of the noncovalent interactions (NCI) method <sup>2</sup> were performed with the Multiwfn (A Multifunctional Wavefunction Analyzer) software <sup>3</sup>. This method is based on the relationship between the electron density ( $\rho$ ) and the reduced density gradient ( $RDG = \frac{1}{2(3\pi^2)^{1/3}} \frac{|\nabla\rho|}{\rho^{4/3}}$ ), and is a very useful tool for the analysis and visualization of different types of non-covalent interactions. Chemcraft program <sup>4</sup> was employed to visualize the chemical structures and molecular orbitals of investigated compounds, and VMD (Visual Molecular Dynamics) <sup>5</sup> and Multiwfn software<sup>3</sup> were used for visualization of their RDG isosurfaces. The latter software was also used to perform the quantitative analysis of molecular surfaces of **5b**, **16a** and **16b**.

**Cartesian coordinates and total energies for the geometries of *cis*-9b  
and *trans*-9b optimized using Gaussian 09**

**Table S1.** Atom coordinates (Å), total energy (Hartree) and the number of imaginary vibrational frequencies for the geometry of *cis*-9b optimized at the B3LYP/6-31++(d,p) level in the gas phase using Gaussian 09.

|   |           |           |           |
|---|-----------|-----------|-----------|
| H | 0.515590  | -3.776210 | 0.065460  |
| C | 0.343632  | -2.702158 | 0.172555  |
| C | 1.458119  | -1.952754 | -0.513957 |
| C | 2.711596  | -2.584562 | -0.683454 |
| C | 3.686621  | -1.897029 | -1.375815 |
| O | 4.954823  | -2.311444 | -1.717134 |
| C | 5.592135  | -1.143211 | -2.255601 |
| O | 4.557124  | -0.216292 | -2.613136 |
| C | 3.446196  | -0.636884 | -1.915718 |
| C | 2.226327  | -0.007548 | -1.779079 |
| C | 1.218969  | -0.674027 | -1.049490 |
| C | -0.145246 | -0.026123 | -0.886016 |
| H | -0.293606 | 0.669623  | -1.719168 |
| C | -0.248703 | 0.890152  | 0.442795  |
| H | -0.098402 | 0.217177  | 1.290334  |
| C | 0.844824  | 1.937684  | 0.441758  |
| C | 2.106780  | 1.638274  | 0.993633  |
| C | 3.088880  | 2.603513  | 0.895589  |
| O | 4.387451  | 2.537380  | 1.333082  |
| C | 4.917479  | 3.863254  | 1.156089  |
| O | 4.036859  | 4.562899  | 0.271000  |
| C | 2.870259  | 3.827772  | 0.258983  |
| C | 1.650537  | 4.151811  | -0.284017 |
| C | 0.620561  | 3.187009  | -0.167841 |
| C | -0.745145 | 3.571878  | -0.614353 |
| O | -0.941872 | 4.568084  | -1.312177 |
| C | -1.868956 | 2.765541  | -0.067085 |
| C | -3.163975 | 3.337923  | -0.088908 |
| C | -4.163140 | 2.639547  | 0.544603  |
| O | -5.501377 | 2.952089  | 0.658712  |
| C | -6.030364 | 2.015544  | 1.602807  |

|                                             |           |              |           |
|---------------------------------------------|-----------|--------------|-----------|
| O                                           | -5.083910 | 0.938238     | 1.718412  |
| C                                           | -3.917295 | 1.420193     | 1.180685  |
| C                                           | -2.668721 | 0.831148     | 1.188482  |
| C                                           | -1.622367 | 1.519953     | 0.542032  |
| C                                           | -1.232575 | -1.086015    | -0.956317 |
| C                                           | -2.459991 | -0.789507    | -1.589722 |
| C                                           | -3.422166 | -1.776138    | -1.618430 |
| O                                           | -4.667379 | -1.745273    | -2.206182 |
| C                                           | -5.324375 | -2.935360    | -1.748122 |
| O                                           | -4.308809 | -3.829289    | -1.268973 |
| C                                           | -3.206361 | -3.031845    | -1.054174 |
| C                                           | -2.009735 | -3.357962    | -0.454105 |
| C                                           | -1.007661 | -2.362685    | -0.415305 |
| H                                           | 2.894765  | -3.587067    | -0.311227 |
| H                                           | 6.157921  | -1.417541    | -3.147251 |
| H                                           | 6.233885  | -0.692429    | -1.485274 |
| H                                           | 2.047379  | 0.966745     | -2.220707 |
| H                                           | 2.301949  | 0.683485     | 1.468216  |
| H                                           | 5.910126  | 3.797603     | 0.707052  |
| H                                           | 4.943104  | 4.372132     | 2.129634  |
| H                                           | 1.449728  | 5.101447     | -0.765779 |
| H                                           | -3.324082 | 4.294306     | -0.572550 |
| H                                           | -6.980078 | 1.623137     | 1.234916  |
| H                                           | -6.141844 | 2.501703     | 2.581949  |
| H                                           | -2.503630 | -0.128019    | 1.666001  |
| H                                           | -2.641416 | 0.182532     | -2.035123 |
| H                                           | -5.853837 | -3.401120    | -2.580754 |
| H                                           | -6.003149 | -2.680665    | -0.921771 |
| H                                           | -1.837565 | -4.344662    | -0.037183 |
| S                                           | 0.229749  | -2.404550    | 2.039398  |
| C                                           | 1.838711  | -3.014481    | 2.667770  |
| H                                           | 1.963566  | -2.548650    | 3.650130  |
| H                                           | 2.650103  | -2.653476    | 2.029498  |
| C                                           | 1.900535  | -4.530868    | 2.809400  |
| H                                           | 1.718896  | -5.014925    | 1.838528  |
| H                                           | 1.122433  | -4.868928    | 3.506735  |
| O                                           | 3.206512  | -4.852774    | 3.295439  |
| H                                           | 3.264511  | -5.804579    | 3.447583  |
| Total energy                                |           | -2460.004177 |           |
| Number of imaginary vibrational frequencies |           | 0            |           |

**Table S2.** Atom coordinates (Å), total energy (Hartree) and the number of imaginary vibrational frequencies for the geometry of *trans*-**9b** optimized at the B3LYP/6-31++(d,p) level in the gas phase using Gaussian 09.

| Atom | X         | Y         | z         |
|------|-----------|-----------|-----------|
| O    | -4.912202 | 1.585518  | 1.488486  |
| C    | -3.669161 | 1.935627  | 1.027387  |
| C    | -2.506630 | 1.192307  | 1.065503  |
| C    | -1.348807 | 1.765122  | 0.500745  |
| C    | -1.235952 | -0.860491 | -1.013824 |
| C    | -2.360346 | -0.466105 | -1.767963 |
| C    | -3.430894 | -1.334156 | -1.821816 |
| O    | -4.613102 | -1.205602 | -2.517457 |
| C    | -5.439667 | -2.277734 | -2.040875 |
| O    | -4.579070 | -3.238989 | -1.413818 |
| C    | -3.409092 | -2.555675 | -1.158781 |
| C    | -2.315876 | -2.975082 | -0.427552 |
| C    | -1.203111 | -2.109713 | -0.364602 |
| H    | 2.534566  | -3.777185 | -0.069751 |
| H    | 6.010289  | -2.269314 | -3.076157 |
| H    | 6.191110  | -1.424986 | -1.480130 |
| H    | 2.235703  | 0.684545  | -2.331496 |
| H    | 2.427564  | 0.372689  | 1.468983  |
| H    | 6.431798  | 2.968457  | 0.826042  |
| H    | 5.565748  | 3.625461  | 2.277419  |
| H    | 2.214663  | 4.944332  | -0.598153 |
| H    | -2.627630 | 4.774882  | -0.564861 |
| H    | -6.677076 | 2.512083  | 0.916791  |
| H    | -5.839417 | 3.227924  | 2.356914  |
| H    | -2.494049 | 0.198912  | 1.499580  |
| H    | -2.384059 | 0.489197  | -2.281215 |
| H    | -5.951339 | -2.744048 | -2.884378 |
| H    | -6.149319 | -1.885943 | -1.297878 |
| H    | -2.311932 | -3.938039 | 0.066906  |
| S    | 0.130985  | -4.240127 | 0.933142  |
| C    | 0.932765  | -4.070302 | 2.575122  |
| H    | 1.405111  | -5.035133 | 2.781030  |
| H    | 1.728302  | -3.321076 | 2.524805  |
| C    | -0.052272 | -3.729222 | 3.687147  |

|                                                |           |              |          |
|------------------------------------------------|-----------|--------------|----------|
| H                                              | -0.590270 | -2.800331    | 3.447968 |
| H                                              | -0.793870 | -4.533789    | 3.782469 |
| O                                              | 0.707958  | -3.580372    | 4.888691 |
| H                                              | 0.107642  | -3.422282    | 5.628365 |
| H                                              | 0.072027  | -1.911156    | 1.341034 |
| Total energy                                   |           | -2459.996890 |          |
| Number of imaginary<br>vibrational frequencies |           | 0            |          |

**Table S3.** Atom coordinates (Å), total energy (Hartree) and the number of imaginary vibrational frequencies for the geometry of **5b** optimized at the B3LYP/6-311++(d,p) level in the gas phase using Gaussian 09.

| Atom | X         | Y         | Z         |
|------|-----------|-----------|-----------|
| O    | 4.003551  | -2.887588 | -0.068798 |
| C    | 5.127414  | -2.263804 | -0.706813 |
| H    | 5.532462  | -2.934285 | -1.463405 |
| H    | 5.875831  | -2.005209 | 0.052782  |
| O    | 4.652318  | -1.066696 | -1.332568 |
| C    | 2.672433  | 0.331054  | -0.808993 |
| H    | 2.975369  | 1.182700  | -1.402091 |
| C    | 1.445439  | 0.345175  | -0.114939 |
| C    | 1.043898  | -0.763506 | 0.649892  |
| C    | 1.873879  | -1.901510 | 0.732739  |
| H    | 1.578800  | -2.762824 | 1.319850  |
| C    | 3.062110  | -1.892791 | 0.040291  |
| C    | 3.451237  | -0.795764 | -0.717793 |
| C    | 0.600219  | 1.586782  | -0.229141 |
| H    | -0.406597 | 1.429895  | 0.151837  |
| O    | 0.562767  | 2.027703  | -1.567803 |
| C    | 0.094205  | 3.368642  | -1.607538 |
| H    | -0.958877 | 3.411159  | -1.300240 |
| H    | 0.178892  | 3.703620  | -2.642345 |
| C    | 0.962915  | 4.192843  | -0.649270 |
| H    | 1.902274  | 4.490270  | -1.116726 |
| H    | 0.436677  | 5.079701  | -0.294632 |
| S    | 1.299917  | 3.056795  | 0.757260  |
| C    | -0.275931 | -0.810897 | 1.418706  |
| H    | -0.253360 | -1.730777 | 2.024343  |
| O    | -0.430789 | 0.290345  | 2.314258  |
| C    | 0.443556  | 0.260736  | 3.432332  |
| H    | 0.199582  | 1.131307  | 4.040564  |
| H    | 0.292769  | -0.651628 | 4.025762  |
| H    | 1.495547  | 0.318601  | 3.130571  |
| C    | -1.525518 | -0.881328 | 0.540590  |
| C    | -1.487787 | -1.498469 | -0.711344 |
| C    | -2.745479 | -0.388345 | 1.048176  |
| C    | -2.640297 | -1.648613 | -1.500370 |
| H    | -0.545988 | -1.868306 | -1.096071 |



|                                             |           |              |           |
|---------------------------------------------|-----------|--------------|-----------|
| C                                           | -3.864526 | -0.543726    | 0.261968  |
| H                                           | -2.788466 | 0.107058     | 2.007582  |
| C                                           | -3.819070 | -1.160020    | -0.983350 |
| H                                           | -2.600974 | -2.116002    | -2.475894 |
| O                                           | -5.068580 | -1.126733    | -1.559908 |
| O                                           | -5.146951 | -0.103114    | 0.506550  |
| C                                           | -5.948761 | -0.726500    | -0.502630 |
| H                                           | -6.673995 | -0.009921    | -0.885519 |
| H                                           | -6.436752 | -1.615183    | -0.081437 |
| Total energy                                |           | -1584.317859 |           |
| Number of imaginary vibrational frequencies |           | 0            |           |

**Table S4.** Atom coordinates (Å), total energy (Hartree) and the number of imaginary vibrational frequencies for the geometry of **16a** optimized at the B3LYP/6-311++(d,p) level in the gas phase using Gaussian 09.

| Atom | X         | Y         | Z         |
|------|-----------|-----------|-----------|
| C    | 3.976628  | -0.894226 | -0.200932 |
| C    | 2.945527  | -1.590379 | 0.387051  |
| C    | 1.662135  | -1.017971 | 0.329827  |
| C    | 1.455522  | 0.213924  | -0.295718 |
| C    | 2.524757  | 0.912110  | -0.885020 |
| C    | 3.770572  | 0.330929  | -0.824529 |
| C    | 0.075109  | 0.829343  | -0.301008 |
| C    | 0.505287  | -1.732794 | 0.991458  |
| C    | -1.013767 | -0.224323 | -0.349756 |
| C    | -0.809819 | -1.458362 | 0.283395  |
| C    | -1.796146 | -2.459745 | 0.233845  |
| H    | -1.635335 | -3.431859 | 0.684140  |
| C    | -2.967432 | -2.173515 | -0.433692 |
| C    | -3.166976 | -0.954115 | -1.065707 |
| C    | -2.205176 | 0.033057  | -1.053162 |
| H    | 3.116905  | -2.538341 | 0.881829  |
| H    | 2.376190  | 1.873248  | -1.361627 |
| H    | -2.357449 | 0.962873  | -1.587991 |
| H    | -0.024191 | 1.473587  | -1.183886 |
| H    | 0.689707  | -2.817199 | 0.963078  |
| C    | -1.091952 | 2.550765  | 0.983801  |

|                                             |           |              |           |
|---------------------------------------------|-----------|--------------|-----------|
| H                                           | -2.019332 | 2.088928     | 0.626666  |
| H                                           | -1.214613 | 2.751930     | 2.050320  |
| C                                           | -0.815554 | 3.859980     | 0.241327  |
| H                                           | 0.052929  | 4.350541     | 0.680749  |
| H                                           | -0.625422 | 3.676141     | -0.817109 |
| O                                           | 0.507737  | -1.324241    | 2.370385  |
| C                                           | -0.342288 | -2.075113    | 3.217959  |
| H                                           | -0.148789 | -1.729337    | 4.233816  |
| H                                           | -1.402660 | -1.919886    | 2.985736  |
| H                                           | -0.120118 | -3.151249    | 3.159449  |
| O                                           | 5.312107  | -1.218593    | -0.255063 |
| O                                           | 4.969513  | 0.816746     | -1.291617 |
| C                                           | 5.887597  | -0.277066    | -1.169185 |
| H                                           | 6.833401  | 0.085893     | -0.769079 |
| H                                           | 6.015753  | -0.754303    | -2.149080 |
| O                                           | -4.048245 | -2.992460    | -0.662042 |
| O                                           | -4.378532 | -0.965041    | -1.715367 |
| C                                           | -5.048892 | -2.133089    | -1.224553 |
| H                                           | -5.542870 | -2.642596    | -2.050368 |
| H                                           | -5.758601 | -1.841396    | -0.440185 |
| O                                           | 0.005182  | 1.652553     | 0.887332  |
| S                                           | -2.293894 | 4.958642     | 0.401606  |
| H                                           | -1.746105 | 6.036573     | -0.193585 |
| Total energy                                |           | -1584.320012 |           |
| Number of imaginary vibrational frequencies |           | 0            |           |

**Table S5.** Atom coordinates (Å), total energy (Hartree) and the number of imaginary vibrational frequencies for the geometry of **16b** optimized at the B3LYP/6-311++(d,p) level in the gas phase using Gaussian 09.

| Atom | X        | Y         | Z         |
|------|----------|-----------|-----------|
| C    | 3.743403 | 0.332348  | -0.843920 |
| C    | 2.527987 | 0.974423  | -0.822405 |
| C    | 1.436609 | 0.281035  | -0.262365 |
| C    | 1.601248 | -1.005710 | 0.258503  |
| C    | 2.856959 | -1.641020 | 0.230555  |
| C    | 3.905342 | -0.949852 | -0.329331 |
| C    | 0.077881 | 0.940321  | -0.228198 |

|                                             |           |              |           |
|---------------------------------------------|-----------|--------------|-----------|
| C                                           | 0.431888  | -1.708818    | 0.907022  |
| C                                           | -0.884779 | -1.336064    | 0.251651  |
| C                                           | -1.053766 | -0.051340    | -0.285598 |
| C                                           | -2.255571 | 0.301531     | -0.930945 |
| H                                           | -2.391365 | 1.275808     | -1.383835 |
| C                                           | -3.251286 | -0.648513    | -0.993307 |
| C                                           | -3.084818 | -1.918143    | -0.458411 |
| C                                           | -1.912289 | -2.292802    | 0.159424  |
| H                                           | 2.416119  | 1.978304     | -1.212882 |
| H                                           | 2.992926  | -2.632652    | 0.643955  |
| H                                           | -1.783427 | -3.295349    | 0.549154  |
| H                                           | -0.002310 | 1.630049     | -1.069392 |
| H                                           | 0.567753  | -2.796895    | 0.818561  |
| S                                           | 0.037539  | 2.020398     | 1.321258  |
| C                                           | -1.465994 | 3.033282     | 1.074093  |
| H                                           | -2.304450 | 2.396861     | 0.784931  |
| H                                           | -1.696324 | 3.436587     | 2.063012  |
| C                                           | -1.286541 | 4.176962     | 0.086689  |
| H                                           | -0.497761 | 4.849775     | 0.442845  |
| H                                           | -0.984011 | 3.793511     | -0.896801 |
| O                                           | -2.541549 | 4.858064     | -0.008778 |
| H                                           | -2.439676 | 5.621758     | -0.584779 |
| O                                           | 0.490869  | -1.371287    | 2.305019  |
| C                                           | -0.399753 | -2.094342    | 3.135775  |
| H                                           | -0.165390 | -1.808290    | 4.161419  |
| H                                           | -1.448514 | -1.851214    | 2.929704  |
| H                                           | -0.257756 | -3.179989    | 3.026699  |
| O                                           | 4.952302  | 0.798616     | -1.304133 |
| O                                           | 5.222175  | -1.329035    | -0.447146 |
| C                                           | 5.819375  | -0.342701    | -1.297501 |
| H                                           | 5.900160  | -0.742298    | -2.316392 |
| H                                           | 6.791113  | -0.057856    | -0.896355 |
| O                                           | -4.509945 | -0.537332    | -1.534323 |
| O                                           | -4.236158 | -2.649555    | -0.639915 |
| C                                           | -5.027199 | -1.874613    | -1.550002 |
| H                                           | -6.063448 | -1.866789    | -1.215022 |
| H                                           | -4.928007 | -2.289357    | -2.561093 |
| Total energy                                |           | -1584.330880 |           |
| Number of imaginary vibrational frequencies |           | 0            |           |

## References

1. G. M. Sheldrick, Crystal structure refinement with *SHELXL*, *Acta Crystallographica C* 71 (2015) 3-8.
2. E. R. Johnson, S. Keinan, P. Mori-Sanchez, J. Contreras-Garcia, A.J. Cohen, W. Yang, Revealing noncovalent interactions, *Journal of the American Chemical Society* 132 (2010) 6498–6506.
3. T. Lu, F. Chen, Multiwfn: A multifunctional wavefunction analyzer, *Journal Computational Chemistry*, 33 (2012) 580–592.
4. Chemcraft - graphical software for visualization of quantum chemistry computations. <https://www.chemcraftprog.com>
5. W. Humphrey, A. Dalke, K. Schulten, VMD - Visual Molecular Dynamics, *Journal of Molecular Graphics* 14 (1996) 33-38
